# Supplementary material for: Clinical Applicability of Whole-Exome Sequencing Exemplified by a Study in Young Adults with the Advanced Cryptogenic Cholestatic Liver Diseases
Source: Hindawi journal article supplement (doi:10.1155/2017/4761962), 2017-01-01
Supplement: f1 [file 4761962.f1.pdf]

*Table 1. Mean coverage (first row) and fraction of gene (second row) with coverage more than 20x in each patient.*

| gene   | PATIENT#1 | PATIENT#2 | PATIENT#3 | PATIENT#4 | PATIENT#5 | PATIENT#6 |
|--------|-----------|-----------|-----------|-----------|-----------|-----------|
| ABCB11 | 56.02     | 105.70    | 96.93     | 113.28    | 51.76     | 98.20     |
| ABCB11 | 0.82      | 0.93      | 0.91      | 0.92      | 0.78      | 0.88      |
| ABCB4  | 39.85     | 75.06     | 78.27     | 74.39     | 40.36     | 40.76     |
| ABCB4  | 0.76      | 0.89      | 0.89      | 0.87      | 0.78      | 0.67      |
| ATP8B1 | 43.56     | 91.70     | 90.11     | 87.39     | 44.93     | 65.53     |
| ATP8B1 | 0.72      | 0.91      | 0.90      | 0.81      | 0.72      | 0.72      |

Table 2. Rare and novel variants recessive homozygous which are deleterious in silico.

| Family   | Chromosome | Position  | Reference | Alternative | Variant Quality | Variant consequence                    | Gene     | Protein position | Amino acid change | Existing variation                                  | SIFT                           | Polyphen                 | GMAF (1000 genomes) | GMAF (ExAC)             |
|----------|------------|-----------|-----------|-------------|-----------------|----------------------------------------|----------|------------------|-------------------|-----------------------------------------------------|--------------------------------|--------------------------|---------------------|-------------------------|
| Family#1 | chr1       | 147091972 | C         | T           | 884.65          | missense_variant                       | BCL9     | 671              | P/S               |                                                     | deleterious(0.03)              | benign(0.001)            |                     |                         |
| Family#1 | chr2       | 220412282 | T         | G           | 95.54           | missense_variant                       | TMEM198  | 74               | V/G               | rs145979116                                         | tolerated(0.08)                | possibly_damaging(0.637) | G:0.0048            | G:0.01314               |
| Family#1 | chr3       | 10140432  | A         | T           | 126.32          | missense_variant                       | FANCD2   | 1405             | Q/L               | rs746871581                                         | deleterious(0.01)              | benign(0.287)            |                     | T:8.255e-06             |
| Family#1 | chr3       | 128695837 | T         | C           | 83.59           | missense_variant                       | KIAA1257 | 294              | D/G               | rs187885262                                         | deleterious(0.04)              | benign(0.158)            | C:0.0014            | C:0.002786              |
| Family#1 | chr5       | 135288632 | A         | G           | 53.61           | missense_variant                       | LECT2    | 24               | I/T               | rs626237078&COSM1.179695                            | deleterious(0)                 | benign(0.424)            | G:0.0132            | G:0.02976               |
| Family#1 | chr5       | 149772280 | C         | G           | 203.22          | missense_variant                       | TCOF1    | 1176             | P/R               |                                                     | deleterious(0.01)              | possibly_damaging(0.593) |                     |                         |
| Family#1 | chr5       | 150924968 | A         | G           | 226.57          | missense_variant                       | FAT2     | 1907             | I/T               | rs150700679                                         |                                | probably_damaging(0.928) | G:0.0046            | G:0.005284              |
| Family#1 | chr14      | 55169280  | G         | A           | 318.45          | missense_variant                       | SAMD4A   | 233              | G/R               | rs201482871                                         | deleterious(0.02)              | probably_damaging(0.996) | A:0.0022            | A:0.0009163             |
| Family#1 | chr19      | 287703    | G         | A           | 174.18          | missense_variant                       | PPAP2C   | 106              | R/C               | rs61745392                                          | deleterious(0)                 | possibly_damaging(0.888) | A:0.0032            | A:0.00552               |
| Family#1 | chr19      | 5785224   | G         | C           | 407.07          | missense_variant                       | DUS3L    | 648              | A/G               | rs762607568                                         | deleterious(0.01)              | possibly_damaging(0.745) |                     | A:3.203e-05&C:4.804e-05 |
| Family#1 | chr19      | 54080140  | A         | T           | 701.2           | missense_variant                       | ZNF331   | 109              | K/I               | rs112855712                                         | deleterious(0.03)              | benign(0.352)            | T:0.0018            | T:0.007711              |
| Family#1 | chr19      | 55329934  | A         | G           | 107.34          | missense_variant                       | KIR3DL1  | 79               | S/G               | rs62124092                                          | tolerated(0.16)                | benign(0.161)            |                     |                         |
| Family#1 | chr22      | 25425282  | A         | G           | 203.04          | missense_variant                       | KIAA1671 | 439              | K/R               | rs17667531                                          | deleterious(0.01)              | possibly_damaging(0.558) |                     |                         |
| Family#2 | chr5       | 140186980 | G         | A           | 251.13          | missense_variant                       | PCDH44   | 70               | G/S               | COSM37476138&COSM3747612                            | tolerated_low_confidence(0.08) | benign(0.093)            |                     |                         |
| Family#2 | chr6       | 26463574  | G         | T           | 237.25          | missense_variant                       | BTN2A1   | 178              | W/L               | rs13195401                                          | deleterious(0)                 | probably_damaging(1)     |                     | T:0.046                 |
| Family#2 | chr6       | 26463575  | G         | T           | 239.19          | missense_variant                       | BTN2A1   | 178              | W/C               | rs13195402                                          | deleterious(0)                 | probably_damaging(1)     |                     | T:0.046                 |
| Family#2 | chr6       | 27879200  | C         | A           | 423.33          | missense_variant                       | OR2B2    | 300              | A/S               | rs34788973                                          | deleterious(0.02)              | benign(0.196)            |                     | A:0.048                 |
| Family#2 | chr6       | 27879982  | G         | C           | 312.79          | missense_variant                       | OR2B2    | 309              | I/T               | rs61742093                                          | deleterious(0.01)              | benign(0.359)            |                     | G:0.048                 |
| Family#2 | chr9       | 107361439 | G         | C           | 466.51          | missense_variant                       | OR13C5   | 86               | L/V               | rs605739798&COSM1.163181                            | tolerated(0.13)                | probably_damaging(0.996) |                     |                         |
| Family#2 | chr17      | 71468356  | A         | G           | 420.4           | missense_variant&splice_region_variant | SDK2     | 76               | Y/H               | rs117687984                                         | tolerated(0.09)                | probably_damaging(0.999) |                     | G:5.183e-03             |
| Family#2 | chr22      | 50943232  | G         | A           | 266.23          | missense_variant&splice_region_variant | LMF2     | 479              | T/M               | COSM3759305                                         | tolerated(0.09)                | benign(0.378)            |                     |                         |
| Family#2 | chrX       | 55172537  | G         | A           | 875.16          | stop_gained                            | FAM104B  | 111              | R/*               | rs1047054                                           |                                |                          |                     | A:3.270e-03             |
| Family#3 | chr3       | 113955187 | A         | C           | 686.91          | stop_gained                            | ZNF80    | 245              | Y/*               |                                                     |                                |                          |                     |                         |
| Family#3 | chr15      | 23086243  | T         | A           | 149.03          | stop_gained                            | NIPA1    | 57               | K/*               | rs780182552                                         |                                |                          |                     | G:8.530e-06             |
| Family#3 | chr22      | 50685332  | G         | A           | 394.81          | missense_variant                       | HDA10    | 496              | R/W               | rs61748567                                          | deleterious(0.02)              | benign(0.008)            |                     | A:0.013                 |
| Family#3 | chrX       | 55172537  | G         | A           | 778.63          | stop_gained                            | FAM104B  | 111              | R/*               | rs1047054                                           |                                |                          |                     | A:3.270e-03             |
| Family#6 | chr7       | 20762646  | G         | T           | 189.62          | missense_variant                       | ABC5     | 810              | G/V               | COSM37625638&COSM3762562                            | deleterious(0)                 | possibly_damaging(0.882) |                     |                         |
| Family#6 | chr7       | 73085699  | A         | C           | 67.08           | missense_variant                       | VPS37D   | 250              | H/P               |                                                     | deleterious(0.02)              | probably_damaging(0.924) |                     |                         |
| Family#6 | chr7       | 150068605 | G         | A           | 181.15          | missense_variant                       | REP1N    | 149              | R/H               | COSM3762482&COSM3762481                             | tolerated(0.08)                | benign(0.032)            |                     |                         |
| Family#6 | chr8       | 11710888  | G         | C           | 511.46          | missense_variant                       | CTSB     | 26               | L/V               | CM0660158&COSM3763011                               | deleterious(0)                 | benign(0.055)            |                     |                         |
| Family#6 | chr10      | 69934258  | C         | G           | 163.42          | missense_variant                       | MYPN     | 803              | S/R               |                                                     | tolerated(0.06)                | possibly_damaging(0.586) |                     |                         |
| Family#6 | chr11      | 117789345 | G         | C           | 614.14          | missense_variant                       | TMPRSS13 | 77               | A/G               | rs619003478&COSM1.6041538&COSM1.6041548&COSM3749138 | tolerated_low_confidence(0.21) | benign(0.176)            |                     |                         |
| Family#6 | chr19      | 17170885  | C         | T           | 943.71          | missense_variant                       | HAUS8    | 83               | G/R               | COSM3756440                                         | deleterious(0.02)              | possibly_damaging(0.84)  |                     |                         |



**Varscan parameters**

|                 |      |
|-----------------|------|
| Min coverage    | 20   |
| Min reads2      | 4    |
| Min var freq    | 0.2  |
| Min avg qual    | 15   |
| P-value thresh  | 0.05 |
| Adj. min reads2 | 2    |
| Adj. var freq   | 0.05 |
| Adj. p-value    | 0.05 |

**Torrent Variant Caller (TVC) parameteres**

|                              |      |
|------------------------------|------|
| snp_min_allele_freq          | 0.1  |
| snp_strand_bias              | 0.99 |
| snp_strand_bias_pval         | 1    |
| snp_min_variant_score        | 15   |
| mnp_min_variant_score        | 15   |
| hp_max_length                | 25   |
| filter_insertion_predictions | 0.25 |
| indel_min_variant_score      | 20   |
| indel_min_coverage           | 5    |
| heavy_tailed                 | 3    |
| outlier_probability          | 0.01 |
| indel_strand_bias_pval       | 1    |
| data_quality_stringency      | 20   |
| snp_min_cov_each_strand      | 0    |
| mnp_strand_bias              | 0.99 |
| mnp_strand_bias_pval         | 1    |
| indel_strand_bias            | 0.95 |
| downsample_to_coverage       | 400  |
| filter_unusual_predictions   | 0.25 |
| indel_min_allele_freq        | 0.1  |
| mnp_min_allele_freq          | 0.1  |
| do_snp_realignment           | 1    |
| mnp_min_cov_each_strand      | 0    |
| mnp_min_coverage             | 5    |
| prediction_precision         | 1    |
| indel_min_cov_each_strand    | 1    |
| filter_deletion_predictions  | 0.25 |
| suppress_recalibration       | 0    |
| snp_min_coverage             | 5    |

| Reactome Bile Acid Metabolism | Associated.Gene.Name | Description                                                                                                                      |
|-------------------------------|----------------------|----------------------------------------------------------------------------------------------------------------------------------|
| Ensembl.Gene.ID               | Associated.Gene.Name | Description                                                                                                                      |
| ENSG0000001167                | NFYA                 | nuclear transcription factor Y, alpha [Source:HGNC Symbol;Acc:7804]                                                              |
| ENSG0000001630                | CYP51A1              | cytochrome P450, family 51, subfamily A, polypeptide 1 [Source:HGNC Symbol;Acc:2649]                                             |
| ENSG00000005339               | CREBBP               | CREB binding protein [Source:HGNC Symbol;Acc:2348]                                                                               |
| ENSG00000012174               | MBTPS2               | membrane-bound transcription factor peptidase, site 2 [Source:HGNC Symbol;Acc:15455]                                             |
| ENSG00000036530               | CYP46A1              | cytochrome P450, family 46, subfamily A, polypeptide 1 [Source:HGNC Symbol;Acc:2641]                                             |
| ENSG00000052802               | MSMO1                | methylsterol monooxygenase 1 [Source:HGNC Symbol;Acc:10545]                                                                      |
| ENSG00000066136               | NFYC                 | nuclear transcription factor Y, gamma [Source:HGNC Symbol;Acc:7806]                                                              |
| ENSG00000067064               | IDI1                 | isopentenyl-diphosphate delta isomerase 1 [Source:HGNC Symbol;Acc:5387]                                                          |
| ENSG00000072310               | SREBF1               | sterol regulatory element binding transcription factor 1 [Source:HGNC Symbol;Acc:11289]                                          |
| ENSG00000073734               | ABCB11               | ATP-binding cassette, sub-family B (MDR/TAP), member 11 [Source:HGNC Symbol;Acc:42]                                              |
| ENSG00000076555               | ACACB                | acetyl-CoA carboxylase beta [Source:HGNC Symbol;Acc:85]                                                                          |
| ENSG00000079459               | FDFT1                | farnesyl-diphosphate farnesyltransferase 1 [Source:HGNC Symbol;Acc:3629]                                                         |
| ENSG00000082014               | SMARCD3              | SWI/SNF related, matrix associated, actin dependent regulator of chromatin, subfamily d, member 3 [Source:HGNC Symbol;Acc:11108] |
| ENSG00000083807               | SLC27A5              | solute carrier family 27 (fatty acid transporter), member 5 [Source:HGNC Symbol;Acc:10999]                                       |
| ENSG00000084453               | SLCO1A2              | solute carrier organic anion transporter family, member 1A2 [Source:HGNC Symbol;Acc:10956]                                       |
| ENSG00000084676               | NCOA1                | nuclear receptor coactivator 1 [Source:HGNC Symbol;Acc:7668]                                                                     |
| ENSG00000099377               | HSD3B7               | hydroxy-delta-5-steroid dehydrogenase, 3 beta- and steroid delta-isomerase 7 [Source:HGNC Symbol;Acc:18324]                      |
| ENSG00000100652               | SLC10A1              | solute carrier family 10 (sodium/bile acid cotransporter), member 1 [Source:HGNC Symbol;Acc:10905]                               |
| ENSG00000100934               | SEC23A               | Sec23 homolog A (S. cerevisiae) [Source:HGNC Symbol;Acc:10701]                                                                   |
| ENSG00000101473               | ACOT8                | acyl-CoA thioesterase 8 [Source:HGNC Symbol;Acc:15919]                                                                           |
| ENSG00000101849               | TBL1X                | transducin (beta)-like 1X-linked [Source:HGNC Symbol;Acc:11585]                                                                  |
| ENSG00000104549               | SQLE                 | squalene epoxidase [Source:HGNC Symbol;Acc:11279]                                                                                |
| ENSG00000108424               | KPNB1                | karyopherin (importin) beta 1 [Source:HGNC Symbol;Acc:6400]                                                                      |
| ENSG00000108846               | ABCC3                | ATP-binding cassette, sub-family C (CFTR/MRP), member 3 [Source:HGNC Symbol;Acc:54]                                              |
| ENSG00000109929               | SC5D                 | sterol-C5-desaturase [Source:HGNC Symbol;Acc:10547]                                                                              |
| ENSG00000110921               | MVK                  | mevalonate kinase [Source:HGNC Symbol;Acc:7530]                                                                                  |
| ENSG00000111700               | SLCO1B3              | solute carrier organic anion transporter family, member 1B3 [Source:HGNC Symbol;Acc:10961]                                       |
| ENSG00000112972               | HMGCS1               | 3-hydroxy-3-methylglutaryl-CoA synthase 1 (soluble) [Source:HGNC Symbol;Acc:5007]                                                |
| ENSG00000113161               | HMGCR                | 3-hydroxy-3-methylglutaryl-CoA reductase [Source:HGNC Symbol;Acc:5006]                                                           |
| ENSG00000113615               | SEC24A               | SEC24 family member A [Source:HGNC Symbol;Acc:10703]                                                                             |
| ENSG00000114650               | SCAP                 | SREBF chaperone [Source:HGNC Symbol;Acc:30634]                                                                                   |
| ENSG00000116133               | DHCR24               | 24-dehydrocholesterol reductase [Source:HGNC Symbol;Acc:2859]                                                                    |
| ENSG00000116171               | SCP2                 | sterol carrier protein 2 [Source:HGNC Symbol;Acc:10606]                                                                          |
| ENSG00000119927               | GPAM                 | glycerol-3-phosphate acyltransferase, mitochondrial [Source:HGNC Symbol;Acc:24865]                                               |
| ENSG00000120837               | NFYB                 | nuclear transcription factor Y, beta [Source:HGNC Symbol;Acc:7805]                                                               |
| ENSG00000122787               | AKR1D1               | aldo-keto reductase family 1, member D1 [Source:HGNC Symbol;Acc:388]                                                             |
| ENSG00000124212               | PTGIS                | prostaglandin I2 (prostacyclin) synthase [Source:HGNC Symbol;Acc:9603]                                                           |
| ENSG00000125255               | SLC10A2              | solute carrier family 10 (sodium/bile acid cotransporter), member 2 [Source:HGNC Symbol;Acc:10906]                               |
| ENSG00000125629               | INSIG2               | insulin induced gene 2 [Source:HGNC Symbol;Acc:20452]                                                                            |
| ENSG00000125686               | MED1                 | mediator complex subunit 1 [Source:HGNC Symbol;Acc:9234]                                                                         |
| ENSG00000130589               | HELZ2                | helicase with zinc finger 2, transcriptional coactivator [Source:HGNC Symbol;Acc:30021]                                          |
| ENSG00000132142               | ACACA                | acetyl-CoA carboxylase alpha [Source:HGNC Symbol;Acc:84]                                                                         |
| ENSG00000132196               | HSD17B7              | hydroxysteroid (17-beta) dehydrogenase 7 [Source:HGNC Symbol;Acc:5215]                                                           |
| ENSG00000132341               | RAN                  | RAN, member RAS oncogene family [Source:HGNC Symbol;Acc:9846]                                                                    |
| ENSG00000133835               | HSD17B4              | hydroxysteroid (17-beta) dehydrogenase 4 [Source:HGNC Symbol;Acc:5213]                                                           |
| ENSG00000134538               | SLCO1B1              | solute carrier organic anion transporter family, member 1B1 [Source:HGNC Symbol;Acc:10959]                                       |
| ENSG00000135929               | CYP27A1              | cytochrome P450, family 27, subfamily A, polypeptide 1 [Source:HGNC Symbol;Acc:2605]                                             |
| ENSG00000136881               | BAAT                 | bile acid CoA: amino acid N-acyltransferase (glycine N-choloyltransferase) [Source:HGNC Symbol;Acc:932]                          |
| ENSG00000137574               | TGS1                 | trimethylguanosine synthase 1 [Source:HGNC Symbol;Acc:17843]                                                                     |

|                 |         |                                                                                                    |
|-----------------|---------|----------------------------------------------------------------------------------------------------|
| ENSG00000138135 | CH25H   | cholesterol 25-hydroxylase [Source:HGNC Symbol;Acc:1907]                                           |
| ENSG00000138802 | SEC24B  | SEC24 family member B [Source:HGNC Symbol;Acc:10704]                                               |
| ENSG00000140284 | SLC27A2 | solute carrier family 27 (fatty acid transporter), member 2 [Source:HGNC Symbol;Acc:10996]         |
| ENSG00000140396 | NCOA2   | nuclear receptor coactivator 2 [Source:HGNC Symbol;Acc:7669]                                       |
| ENSG00000140943 | MBTPS1  | membrane-bound transcription factor peptidase, site 1 [Source:HGNC Symbol;Acc:15456]               |
| ENSG00000142453 | CARM1   | coactivator-associated arginine methyltransferase 1 [Source:HGNC Symbol;Acc:23393]                 |
| ENSG00000143815 | LBR     | lamin B receptor [Source:HGNC Symbol;Acc:6518]                                                     |
| ENSG00000145283 | SLC10A6 | solute carrier family 10 (sodium/bile acid cotransporter), member 6 [Source:HGNC Symbol;Acc:30603] |
| ENSG00000146233 | CYP39A1 | cytochrome P450, family 39, subfamily A, polypeptide 1 [Source:HGNC Symbol;Acc:17449]              |
| ENSG00000147155 | EBP     | emopamil binding protein (sterol isomerase) [Source:HGNC Symbol;Acc:3133]                          |
| ENSG00000147383 | NSDHL   | NAD(P) dependent steroid dehydrogenase-like [Source:HGNC Symbol;Acc:13398]                         |
| ENSG00000148377 | IDI2    | isopentenyl-diphosphate delta isomerase 2 [Source:HGNC Symbol;Acc:23487]                           |
| ENSG00000149809 | TM7SF2  | transmembrane 7 superfamily member 2 [Source:HGNC Symbol;Acc:11863]                                |
| ENSG00000150961 | SEC24D  | SEC24 family member D [Source:HGNC Symbol;Acc:10706]                                               |
| ENSG00000151632 | AKR1C2  | aldo-keto reductase family 1, member C2 [Source:HGNC Symbol;Acc:385]                               |
| ENSG00000152700 | SAR1B   | SAR1 homolog B ( <i>S. cerevisiae</i> ) [Source:HGNC Symbol;Acc:10535]                             |
| ENSG00000152904 | GGPS1   | geranylgeranyl diphosphate synthase 1 [Source:HGNC Symbol;Acc:4249]                                |
| ENSG00000160285 | LSS     | lanosterol synthase (2,3-oxidosqualene-lanosterol cyclase) [Source:HGNC Symbol;Acc:6708]           |
| ENSG00000160752 | FDPS    | farnesyl diphosphate synthase [Source:HGNC Symbol;Acc:3631]                                        |
| ENSG00000163344 | PMVK    | phosphomevalonate kinase [Source:HGNC Symbol;Acc:9141]                                             |
| ENSG00000163631 | ALB     | albumin [Source:HGNC Symbol;Acc:399]                                                               |
| ENSG00000167508 | MVD     | mevalonate (diphospho) decarboxylase [Source:HGNC Symbol;Acc:7529]                                 |
| ENSG00000167910 | CYP7A1  | cytochrome P450, family 7, subfamily A, polypeptide 1 [Source:HGNC Symbol;Acc:2651]                |
| ENSG00000168306 | ACOX2   | acyl-CoA oxidase 2, branched chain [Source:HGNC Symbol;Acc:120]                                    |
| ENSG00000169710 | FASN    | fatty acid synthase [Source:HGNC Symbol;Acc:3594]                                                  |
| ENSG00000170231 | FABP6   | fatty acid binding protein 6, ileal [Source:HGNC Symbol;Acc:3561]                                  |
| ENSG00000170522 | ELOVL6  | ELOVL fatty acid elongase 6 [Source:HGNC Symbol;Acc:15829]                                         |
| ENSG00000172817 | CYP7B1  | cytochrome P450, family 7, subfamily B, polypeptide 1 [Source:HGNC Symbol;Acc:2652]                |
| ENSG00000172893 | DHCR7   | 7-dehydrocholesterol reductase [Source:HGNC Symbol;Acc:2860]                                       |
| ENSG00000176986 | SEC24C  | SEC24 family member C [Source:HGNC Symbol;Acc:10705]                                               |
| ENSG00000177200 | CHD9    | chromodomain helicase DNA binding protein 9 [Source:HGNC Symbol;Acc:25701]                         |
| ENSG00000177565 | TBL1XR1 | transducin (beta)-like 1 X-linked receptor 1 [Source:HGNC Symbol;Acc:29529]                        |
| ENSG00000180432 | CYP8B1  | cytochrome P450, family 8, subfamily B, polypeptide 1 [Source:HGNC Symbol;Acc:2653]                |
| ENSG00000185591 | SP1     | Sp1 transcription factor [Source:HGNC Symbol;Acc:11205]                                            |
| ENSG00000186350 | RXRA    | retinoid X receptor, alpha [Source:HGNC Symbol;Acc:10477]                                          |
| ENSG00000186480 | INSIG1  | insulin induced gene 1 [Source:HGNC Symbol;Acc:6083]                                               |
| ENSG00000186951 | PPARA   | peroxisome proliferator-activated receptor alpha [Source:HGNC Symbol;Acc:9232]                     |
| ENSG00000187134 | AKR1C1  | aldo-keto reductase family 1, member C1 [Source:HGNC Symbol;Acc:384]                               |
| ENSG00000196139 | AKR1C3  | aldo-keto reductase family 1, member C3 [Source:HGNC Symbol;Acc:386]                               |
| ENSG00000198610 | AKR1C4  | aldo-keto reductase family 1, member C4 [Source:HGNC Symbol;Acc:387]                               |
| ENSG00000198646 | NCOA6   | nuclear receptor coactivator 6 [Source:HGNC Symbol;Acc:15936]                                      |
| ENSG00000198911 | SREBF2  | sterol regulatory element binding transcription factor 2 [Source:HGNC Symbol;Acc:11290]            |
| ENSG00000242110 | AMACR   | alpha-methylacyl-CoA racemase [Source:HGNC Symbol;Acc:451]                                         |
| ENSG00000263298 | ABCB11  | ATP-binding cassette, sub-family B (MDR/TAP), member 11 [Source:HGNC Symbol;Acc:42]                |
| ENSG00000265231 | AKR1C2  | aldo-keto reductase family 1, member C2 [Source:HGNC Symbol;Acc:385]                               |
| ENSG00000265685 | AKR1C3  | aldo-keto reductase family 1, member C3 [Source:HGNC Symbol;Acc:386]                               |
| ENSG00000266359 | AKR1C4  | aldo-keto reductase family 1, member C4 [Source:HGNC Symbol;Acc:387]                               |
| ENSG00000266592 | AKR1C1  | aldo-keto reductase family 1, member C1 [Source:HGNC Symbol;Acc:384]                               |
| ENSG00000268394 | EBP     | emopamil binding protein (sterol isomerase) [Source:HGNC Symbol;Acc:3133]                          |
| ENSG00000269336 | NSDHL   | NAD(P) dependent steroid dehydrogenase-like [Source:HGNC Symbol;Acc:13398]                         |
| ENSG00000269571 | RXRA    | retinoid X receptor, alpha [Source:HGNC Symbol;Acc:10477]                                          |

| KEGG Bile acid secretion |                      |                                                                                                                                 |
|--------------------------|----------------------|---------------------------------------------------------------------------------------------------------------------------------|
| Ensembl.Gene.ID          | Associated.Gene.Name | Description                                                                                                                     |
| ENSG0000001626           | CFTR                 | cystic fibrosis transmembrane conductance regulator (ATP-binding cassette sub-family C, member 7) [Source:HGNC Symbol;Acc:1884] |
| ENSG00000005471          | ABCB4                | ATP-binding cassette, sub-family B (MDR/TAP), member 4 [Source:HGNC Symbol;Acc:45]                                              |
| ENSG00000012504          | NR1H4                | nuclear receptor subfamily 1, group H, member 4 [Source:HGNC Symbol;Acc:7967]                                                   |
| ENSG00000018625          | ATP1A2               | ATPase, Na <sup>+</sup> /K <sup>+</sup> transporting, alpha 2 polypeptide [Source:HGNC Symbol;Acc:800]                          |
| ENSG00000023839          | ABCC2                | ATP-binding cassette, sub-family C (CFTR/MRP), member 2 [Source:HGNC Symbol;Acc:53]                                             |
| ENSG000000066230         | SLC9A3               | solute carrier family 9, subfamily A (NHE3, cation proton antiporter 3), member 3 [Source:HGNC Symbol;Acc:11073]                |
| ENSG00000069849          | ATP1B3               | ATPase, Na <sup>+</sup> /K <sup>+</sup> transporting, beta 3 polypeptide [Source:HGNC Symbol;Acc:806]                           |
| ENSG00000072062          | PRKACA               | protein kinase, cAMP-dependent, catalytic, alpha [Source:HGNC Symbol;Acc:9380]                                                  |
| ENSG00000073060          | SCARB1               | scavenger receptor class B, member 1 [Source:HGNC Symbol;Acc:1664]                                                              |
| ENSG00000073734          | ABCB11               | ATP-binding cassette, sub-family B (MDR/TAP), member 11 [Source:HGNC Symbol;Acc:42]                                             |
| ENSG00000078295          | ADCY2                | adenylate cyclase 2 (brain) [Source:HGNC Symbol;Acc:233]                                                                        |
| ENSG00000080293          | SCTR                 | secretin receptor [Source:HGNC Symbol;Acc:10608]                                                                                |
| ENSG00000080493          | SLC4A4               | solute carrier family 4 (sodium bicarbonate cotransporter), member 4 [Source:HGNC Symbol;Acc:11030]                             |
| ENSG00000080709          | KCNN2                | potassium intermediate/small conductance calcium-activated channel, subfamily N, member 2 [Source:HGNC Symbol;Acc:6291]         |
| ENSG00000083807          | SLC27A5              | solute carrier family 27 (fatty acid transporter), member 5 [Source:HGNC Symbol;Acc:10999]                                      |
| ENSG00000084453          | SLCO1A2              | solute carrier organic anion transporter family, member 1A2 [Source:HGNC Symbol;Acc:10956]                                      |
| ENSG00000085563          | ABCB1                | ATP-binding cassette, sub-family B (MDR/TAP), member 1 [Source:HGNC Symbol;Acc:40]                                              |
| ENSG00000087460          | GNAS                 | GNAS complex locus [Source:HGNC Symbol;Acc:4392]                                                                                |
| ENSG00000090020          | SLC9A1               | solute carrier family 9, subfamily A (NHE1, cation proton antiporter 1), member 1 [Source:HGNC Symbol;Acc:11071]                |
| ENSG00000100170          | SLC5A1               | solute carrier family 5 (sodium/glucose cotransporter), member 1 [Source:HGNC Symbol;Acc:11036]                                 |
| ENSG00000100652          | SLC10A1              | solute carrier family 10 (sodium/bile acid cotransporter), member 1 [Source:HGNC Symbol;Acc:10905]                              |
| ENSG00000101892          | ATP1B4               | ATPase, Na <sup>+</sup> /K <sup>+</sup> transporting, beta 4 polypeptide [Source:HGNC Symbol;Acc:808]                           |
| ENSG00000103375          | AQP8                 | aquaporin 8 [Source:HGNC Symbol;Acc:642]                                                                                        |
| ENSG00000103569          | AQP9                 | aquaporin 9 [Source:HGNC Symbol;Acc:643]                                                                                        |
| ENSG00000104267          | CA2                  | carbonic anhydrase II [Source:HGNC Symbol;Acc:1373]                                                                             |
| ENSG00000105398          | SULT2A1              | sulfotransferase family, cytosolic, 2A, dehydroepiandrosterone (DHEA)-preferring, member 1 [Source:HGNC Symbol;Acc:11458]       |
| ENSG00000105409          | ATP1A3               | ATPase, Na <sup>+</sup> /K <sup>+</sup> transporting, alpha 3 polypeptide [Source:HGNC Symbol;Acc:801]                          |
| ENSG00000108846          | ABCC3                | ATP-binding cassette, sub-family C (CFTR/MRP), member 3 [Source:HGNC Symbol;Acc:54]                                             |
| ENSG00000111700          | SLCO1B3              | solute carrier organic anion transporter family, member 1B3 [Source:HGNC Symbol;Acc:10961]                                      |
| ENSG00000113161          | HMGCR                | 3-hydroxy-3-methylglutaryl-CoA reductase [Source:HGNC Symbol;Acc:5006]                                                          |
| ENSG00000117394          | SLC2A1               | solute carrier family 2 (facilitated glucose transporter), member 1 [Source:HGNC Symbol;Acc:11005]                              |
| ENSG00000118777          | ABCG2                | ATP-binding cassette, sub-family G (WHITE), member 2 [Source:HGNC Symbol;Acc:74]                                                |
| ENSG00000121281          | ADCY7                | adenylate cyclase 7 [Source:HGNC Symbol;Acc:238]                                                                                |
| ENSG00000125255          | SLC10A2              | solute carrier family 10 (sodium/bile acid cotransporter), member 2 [Source:HGNC Symbol;Acc:10906]                              |
| ENSG00000125257          | ABCC4                | ATP-binding cassette, sub-family C (CFTR/MRP), member 4 [Source:HGNC Symbol;Acc:55]                                             |
| ENSG00000129244          | ATP1B2               | ATPase, Na <sup>+</sup> /K <sup>+</sup> transporting, beta 2 polypeptide [Source:HGNC Symbol;Acc:805]                           |
| ENSG00000129467          | ADCY4                | adenylate cyclase 4 [Source:HGNC Symbol;Acc:235]                                                                                |
| ENSG00000130164          | LDLR                 | low density lipoprotein receptor [Source:HGNC Symbol;Acc:6547]                                                                  |
| ENSG00000131910          | NR0B2                | nuclear receptor subfamily 0, group B, member 2 [Source:HGNC Symbol;Acc:7961]                                                   |
| ENSG00000132681          | ATP1A4               | ATPase, Na <sup>+</sup> /K <sup>+</sup> transporting, alpha 4 polypeptide [Source:HGNC Symbol;Acc:14073]                        |

|                 |              |                                                                                                             |
|-----------------|--------------|-------------------------------------------------------------------------------------------------------------|
| ENSG00000134538 | SLCO1B1      | solute carrier organic anion transporter family, member 1B1 [Source:HGNC Symbol;Acc:10959]                  |
| ENSG00000136881 | BAAT         | bile acid CoA: amino acid N-acyltransferase (glycine N-choloyltransferase) [Source:HGNC Symbol;Acc:932]     |
| ENSG00000137204 | SLC22A7      | solute carrier family 22 (organic anion transporter), member 7 [Source:HGNC Symbol;Acc:10971]               |
| ENSG00000137731 | FXYP2        | FXYP domain containing ion transport regulator 2 [Source:HGNC Symbol;Acc:4026]                              |
| ENSG00000138031 | ADCY3        | adenylate cyclase 3 [Source:HGNC Symbol;Acc:234]                                                            |
| ENSG00000138075 | ABCG5        | ATP-binding cassette, sub-family G (WHITE), member 5 [Source:HGNC Symbol;Acc:13886]                         |
| ENSG00000142875 | PRKACB       | protein kinase, cAMP-dependent, catalytic, beta [Source:HGNC Symbol;Acc:9381]                               |
| ENSG00000143153 | ATP1B1       | ATPase, Na <sup>+</sup> /K <sup>+</sup> transporting, beta 1 polypeptide [Source:HGNC Symbol;Acc:804]       |
| ENSG00000143819 | EPHX1        | epoxide hydrolase 1, microsomal (xenobiotic) [Source:HGNC Symbol;Acc:3401]                                  |
| ENSG00000143921 | ABCG8        | ATP-binding cassette, sub-family G (WHITE), member 8 [Source:HGNC Symbol;Acc:13887]                         |
| ENSG00000144959 | NCEH1        | neutral cholesterol ester hydrolase 1 [Source:HGNC Symbol;Acc:29260]                                        |
| ENSG00000149452 | SLC22A8      | solute carrier family 22 (organic anion transporter), member 8 [Source:HGNC Symbol;Acc:10972]               |
| ENSG00000155897 | ADCY8        | adenylate cyclase 8 (brain) [Source:HGNC Symbol;Acc:239]                                                    |
| ENSG00000156096 | UGT2B4       | UDP glucuronosyltransferase 2 family, polypeptide B4 [Source:HGNC Symbol;Acc:12553]                         |
| ENSG00000160868 | CYP3A4       | cytochrome P450, family 3, subfamily A, polypeptide 4 [Source:HGNC Symbol;Acc:2637]                         |
| ENSG00000162104 | ADCY9        | adenylate cyclase 9 [Source:HGNC Symbol;Acc:240]                                                            |
| ENSG00000163399 | ATP1A1       | ATPase, Na <sup>+</sup> /K <sup>+</sup> transporting, alpha 1 polypeptide [Source:HGNC Symbol;Acc:799]      |
| ENSG00000163959 | SLC51A       | solute carrier family 51, alpha subunit [Source:HGNC Symbol;Acc:29955]                                      |
| ENSG00000164742 | ADCY1        | adenylate cyclase 1 (brain) [Source:HGNC Symbol;Acc:232]                                                    |
| ENSG00000164889 | SLC4A2       | solute carrier family 4 (anion exchanger), member 2 [Source:HGNC Symbol;Acc:11028]                          |
| ENSG00000165059 | PRKACG       | protein kinase, cAMP-dependent, catalytic, gamma [Source:HGNC Symbol;Acc:9382]                              |
| ENSG00000167910 | CYP7A1       | cytochrome P450, family 7, subfamily A, polypeptide 1 [Source:HGNC Symbol;Acc:2651]                         |
| ENSG00000171885 | AQP4         | aquaporin 4 [Source:HGNC Symbol;Acc:637]                                                                    |
| ENSG00000173175 | ADCY5        | adenylate cyclase 5 [Source:HGNC Symbol;Acc:236]                                                            |
| ENSG00000174233 | ADCY6        | adenylate cyclase 6 [Source:HGNC Symbol;Acc:237]                                                            |
| ENSG00000175003 | SLC22A1      | solute carrier family 22 (organic cation transporter), member 1 [Source:HGNC Symbol;Acc:10963]              |
| ENSG00000183943 | PRKX         | protein kinase, X-linked [Source:HGNC Symbol;Acc:9441]                                                      |
| ENSG00000186198 | SLC51B       | solute carrier family 51, beta subunit [Source:HGNC Symbol;Acc:29956]                                       |
| ENSG00000186350 | RXRA         | retinoid X receptor, alpha [Source:HGNC Symbol;Acc:10477]                                                   |
| ENSG00000188687 | SLC4A5       | solute carrier family 4 (sodium bicarbonate cotransporter), member 5 [Source:HGNC Symbol;Acc:18168]         |
| ENSG00000205754 | SLCO1B7      | solute carrier organic anion transporter family, member 1B7 (non-functional) [Source:HGNC Symbol;Acc:32934] |
| ENSG00000240583 | AQP1         | aquaporin 1 (Colton blood group) [Source:HGNC Symbol;Acc:633]                                               |
| ENSG00000263298 | ABCB11       | ATP-binding cassette, sub-family B (MDR/TAP), member 11 [Source:HGNC Symbol;Acc:42]                         |
| ENSG00000264324 | RP11-287D1.3 | Uncharacterized protein [Source:UniProtKB/TrEMBL;Acc:E7EWF7]                                                |
| ENSG00000269571 | RXRA         | retinoid X receptor, alpha [Source:HGNC Symbol;Acc:10477]                                                   |
| ENSG00000272584 | ATP1A3       | ATPase, Na <sup>+</sup> /K <sup>+</sup> transporting, alpha 3 polypeptide [Source:HGNC Symbol;Acc:801]      |
| LRG_274         | LRG_274      | low density lipoprotein receptor [Source:HGNC Symbol;Acc:6547]                                              |
| LRG_6           | LRG_6        | ATPase, Na <sup>+</sup> /K <sup>+</sup> transporting, alpha 2 polypeptide [Source:HGNC Symbol;Acc:800]      |



| Malacards Cholestatic disease genes |                      |                                                                                                                                                |
|-------------------------------------|----------------------|------------------------------------------------------------------------------------------------------------------------------------------------|
| Ensembl.Gene.ID                     | Associated.Gene.Name | Description                                                                                                                                    |
| ENSG0000001036                      | FUCA2                | fucosidase, alpha-L- 2, plasma [Source:HGNC Symbol;Acc:4008]                                                                                   |
| ENSG00000002549                     | LAP3                 | leucine aminopeptidase 3 [Source:HGNC Symbol;Acc:18449]                                                                                        |
| ENSG00000004864                     | SLC25A13             | solute carrier family 25 (aspartate/glutamate carrier), member 13 [Source:HGNC Symbol;Acc:10983]                                               |
| ENSG00000005381                     | MPO                  | myeloperoxidase [Source:HGNC Symbol;Acc:7218]                                                                                                  |
| ENSG00000005471                     | ABCB4                | ATP-binding cassette, sub-family B (MDR/TAP), member 4 [Source:HGNC Symbol;Acc:45]                                                             |
| ENSG00000006128                     | TAC1                 | tachykinin, precursor 1 [Source:HGNC Symbol;Acc:11517]                                                                                         |
| ENSG00000012504                     | NR1H4                | nuclear receptor subfamily 1, group H, member 4 [Source:HGNC Symbol;Acc:7967]                                                                  |
| ENSG00000017427                     | IGF1                 | insulin-like growth factor 1 (somatomedin C) [Source:HGNC Symbol;Acc:5464]                                                                     |
| ENSG00000021461                     | CYP3A43              | cytochrome P450, family 3, subfamily A, polypeptide 43 [Source:HGNC Symbol;Acc:17450]                                                          |
| ENSG00000023839                     | ABCC2                | ATP-binding cassette, sub-family C (CFTR/MRP), member 2 [Source:HGNC Symbol;Acc:53]                                                            |
| ENSG00000047457                     | CP                   | ceruloplasmin (ferroxidase) [Source:HGNC Symbol;Acc:2295]                                                                                      |
| ENSG00000050748                     | MAPK9                | mitogen-activated protein kinase 9 [Source:HGNC Symbol;Acc:6886]                                                                               |
| ENSG00000070031                     | SCT                  | secretin [Source:HGNC Symbol;Acc:10607]                                                                                                        |
| ENSG00000070444                     | MNT                  | MAX network transcriptional repressor [Source:HGNC Symbol;Acc:7188]                                                                            |
| ENSG00000073734                     | ABCB11               | ATP-binding cassette, sub-family B (MDR/TAP), member 11 [Source:HGNC Symbol;Acc:42]                                                            |
| ENSG00000074582                     | BCS1L                | BC1 (ubiquinol-cytochrome c reductase) synthesis-like [Source:HGNC Symbol;Acc:1020]                                                            |
| ENSG00000078401                     | EDN1                 | endothelin 1 [Source:HGNC Symbol;Acc:3176]                                                                                                     |
| ENSG00000079739                     | PGM1                 | phosphoglucomutase 1 [Source:HGNC Symbol;Acc:8905]                                                                                             |
| ENSG00000081051                     | AFP                  | alpha-fetoprotein [Source:HGNC Symbol;Acc:317]                                                                                                 |
| ENSG00000081923                     | ATP8B1               | ATPase, aminophospholipid transporter, class I, type 8B, member 1 [Source:HGNC Symbol;Acc:3706]                                                |
| ENSG00000082556                     | OPRK1                | opioid receptor, kappa 1 [Source:HGNC Symbol;Acc:8154]                                                                                         |
| ENSG00000084453                     | SLCO1A2              | solute carrier organic anion transporter family, member 1A2 [Source:HGNC Symbol;Acc:10956]                                                     |
| ENSG00000084754                     | HADHA                | hydroxyacyl-CoA dehydrogenase/3-ketoacyl-CoA thiolase/enoyl-CoA hydratase (trifunctional protein), alpha subunit [Source:HGNC Symbol;Acc:4801] |
| ENSG00000085563                     | ABCB1                | ATP-binding cassette, sub-family B (MDR/TAP), member 1 [Source:HGNC Symbol;Acc:40]                                                             |
| ENSG00000087088                     | BAX                  | BCL2-associated X protein [Source:HGNC Symbol;Acc:959]                                                                                         |
| ENSG00000087237                     | CETP                 | cholesteryl ester transfer protein, plasma [Source:HGNC Symbol;Acc:1869]                                                                       |
| ENSG00000089057                     | SLC23A2              | solute carrier family 23 (ascorbic acid transporter), member 2 [Source:HGNC Symbol;Acc:10973]                                                  |
| ENSG00000090382                     | LYZ                  | lysozyme [Source:HGNC Symbol;Acc:6740]                                                                                                         |
| ENSG00000091831                     | ESR1                 | estrogen receptor 1 [Source:HGNC Symbol;Acc:3467]                                                                                              |
| ENSG00000092969                     | TGFB2                | transforming growth factor, beta 2 [Source:HGNC Symbol;Acc:11768]                                                                              |
| ENSG00000099377                     | HSD3B7               | hydroxy-delta-5-steroid dehydrogenase, 3 beta- and steroid delta-isomerase 7 [Source:HGNC Symbol;Acc:18324]                                    |
| ENSG00000099991                     | CABIN1               | calcineurin binding protein 1 [Source:HGNC Symbol;Acc:24187]                                                                                   |
| ENSG00000100031                     | GGT1                 | gamma-glutamyltransferase 1 [Source:HGNC Symbol;Acc:4250]                                                                                      |
| ENSG00000100385                     | IL2RB                | interleukin 2 receptor, beta [Source:HGNC Symbol;Acc:6009]                                                                                     |
| ENSG00000100644                     | HIF1A                | hypoxia inducible factor 1, alpha subunit (basic helix-loop-helix transcription factor) [Source:HGNC Symbol;Acc:4910]                          |
| ENSG00000100652                     | SLC10A1              | solute carrier family 10 (sodium/bile acid cotransporter), member 1 [Source:HGNC Symbol;Acc:10905]                                             |
| ENSG00000100813                     | ACIN1                | apoptotic chromatin condensation inducer 1 [Source:HGNC Symbol;Acc:17066]                                                                      |
| ENSG00000101076                     | HNF4A                | hepatocyte nuclear factor 4, alpha [Source:HGNC Symbol;Acc:5024]                                                                               |
| ENSG00000101187                     | SLCO4A1              | solute carrier organic anion transporter family, member 4A1 [Source:HGNC Symbol;Acc:10953]                                                     |
| ENSG00000101200                     | AVP                  | arginine vasopressin [Source:HGNC Symbol;Acc:894]                                                                                              |
| ENSG00000101384                     | JAG1                 | jagged 1 [Source:HGNC Symbol;Acc:6188]                                                                                                         |
| ENSG00000101665                     | SMAD7                | SMAD family member 7 [Source:HGNC Symbol;Acc:6773]                                                                                             |
| ENSG00000103222                     | ABCC1                | ATP-binding cassette, sub-family C (CFTR/MRP), member 1 [Source:HGNC Symbol;Acc:51]                                                            |
| ENSG00000103375                     | AQP8                 | aquaporin 8 [Source:HGNC Symbol;Acc:642]                                                                                                       |

|                 |           |                                                                                                                                         |
|-----------------|-----------|-----------------------------------------------------------------------------------------------------------------------------------------|
| ENSG00000103769 | RAB11A    | RAB11A, member RAS oncogene family [Source:HGNC Symbol;Acc:9760]                                                                        |
| ENSG00000104043 | ATP8B4    | ATPase, class I, type 8B, member 4 [Source:HGNC Symbol;Acc:13536]                                                                       |
| ENSG00000104067 | TJP1      | tight junction protein 1 [Source:HGNC Symbol;Acc:11827]                                                                                 |
| ENSG00000104324 | CPQ       | carboxypeptidase Q [Source:HGNC Symbol;Acc:16910]                                                                                       |
| ENSG00000105388 | CEACAM5   | carcinoembryonic antigen-related cell adhesion molecule 5 [Source:HGNC Symbol;Acc:1817]                                                 |
| ENSG00000105697 | HAMP      | hepcidin antimicrobial peptide [Source:HGNC Symbol;Acc:15598]                                                                           |
| ENSG00000106258 | CYP3A5    | cytochrome P450, family 3, subfamily A, polypeptide 5 [Source:HGNC Symbol;Acc:2638]                                                     |
| ENSG00000106605 | BLVRA     | biliverdin reductase A [Source:HGNC Symbol;Acc:1062]                                                                                    |
| ENSG00000108064 | TFAM      | transcription factor A, mitochondrial [Source:HGNC Symbol;Acc:11741]                                                                    |
| ENSG00000108753 | HNF1B     | HNF1 homeobox B [Source:HGNC Symbol;Acc:11630]                                                                                          |
| ENSG00000108846 | ABCC3     | ATP-binding cassette, sub-family C (CFTR/MRP), member 3 [Source:HGNC Symbol;Acc:54]                                                     |
| ENSG00000109618 | SEPSECS   | Sep (O-phosphoserine) tRNA:Sec (selenocysteine) tRNA synthase [Source:HGNC Symbol;Acc:30605]                                            |
| ENSG00000110092 | CCND1     | cyclin D1 [Source:HGNC Symbol;Acc:1582]                                                                                                 |
| ENSG00000110680 | CALCA     | calcitonin-related polypeptide alpha [Source:HGNC Symbol;Acc:1437]                                                                      |
| ENSG00000111700 | SLCO1B3   | solute carrier organic anion transporter family, member 1B3 [Source:HGNC Symbol;Acc:10961]                                              |
| ENSG00000112164 | GLP1R     | glucagon-like peptide 1 receptor [Source:HGNC Symbol;Acc:4324]                                                                          |
| ENSG00000112499 | SLC22A2   | solute carrier family 22 (organic cation transporter), member 2 [Source:HGNC Symbol;Acc:10966]                                          |
| ENSG00000112697 | TMEM30A   | transmembrane protein 30A [Source:HGNC Symbol;Acc:16667]                                                                                |
| ENSG00000112715 | VEGFA     | vascular endothelial growth factor A [Source:HGNC Symbol;Acc:12680]                                                                     |
| ENSG00000113302 | IL12B     | interleukin 12B (natural killer cell stimulatory factor 2, cytotoxic lymphocyte maturation factor 2, p40) [Source:HGNC Symbol;Acc:5970] |
| ENSG00000113494 | PRLR      | prolactin receptor [Source:HGNC Symbol;Acc:9446]                                                                                        |
| ENSG00000113594 | LIFR      | leukemia inhibitory factor receptor alpha [Source:HGNC Symbol;Acc:6597]                                                                 |
| ENSG00000114200 | BCHE      | butyrylcholinesterase [Source:HGNC Symbol;Acc:983]                                                                                      |
| ENSG00000115138 | POMC      | proopiomelanocortin [Source:HGNC Symbol;Acc:9201]                                                                                       |
| ENSG00000115221 | ITGB6     | integrin, beta 6 [Source:HGNC Symbol;Acc:6161]                                                                                          |
| ENSG00000115263 | GCG       | glucagon [Source:HGNC Symbol;Acc:4191]                                                                                                  |
| ENSG00000115657 | ABCB6     | ATP-binding cassette, sub-family B (MDR/TAP), member 6 [Source:HGNC Symbol;Acc:47]                                                      |
| ENSG00000116016 | EPAS1     | endothelial PAS domain protein 1 [Source:HGNC Symbol;Acc:3374]                                                                          |
| ENSG00000116044 | NFE2L2    | nuclear factor, erythroid 2-like 2 [Source:HGNC Symbol;Acc:7782]                                                                        |
| ENSG00000116329 | OPRD1     | opioid receptor, delta 1 [Source:HGNC Symbol;Acc:8153]                                                                                  |
| ENSG00000116649 | SRM       | spermidine synthase [Source:HGNC Symbol;Acc:11296]                                                                                      |
| ENSG00000117281 | CD160     | CD160 molecule [Source:HGNC Symbol;Acc:17013]                                                                                           |
| ENSG00000117525 | F3        | coagulation factor III (thromboplastin, tissue factor) [Source:HGNC Symbol;Acc:3541]                                                    |
| ENSG00000117601 | SERPINC1  | serpin peptidase inhibitor, clade C (antithrombin), member 1 [Source:HGNC Symbol;Acc:775]                                               |
| ENSG00000118137 | APOA1     | apolipoprotein A-I [Source:HGNC Symbol;Acc:600]                                                                                         |
| ENSG00000118271 | TTR       | transthyretin [Source:HGNC Symbol;Acc:12405]                                                                                            |
| ENSG00000118432 | CNR1      | cannabinoid receptor 1 (brain) [Source:HGNC Symbol;Acc:2159]                                                                            |
| ENSG00000118777 | ABCG2     | ATP-binding cassette, sub-family G (WHITE), member 2 [Source:HGNC Symbol;Acc:74]                                                        |
| ENSG00000119139 | TJP2      | tight junction protein 2 [Source:HGNC Symbol;Acc:11828]                                                                                 |
| ENSG00000119688 | ABCD4     | ATP-binding cassette, sub-family D (ALD), member 4 [Source:HGNC Symbol;Acc:68]                                                          |
| ENSG00000119899 | SLC17A5   | solute carrier family 17 (acidic sugar transporter), member 5 [Source:HGNC Symbol;Acc:10933]                                            |
| ENSG00000120053 | GOT1      | glutamic-oxaloacetic transaminase 1, soluble [Source:HGNC Symbol;Acc:4432]                                                              |
| ENSG00000120885 | CLU       | clusterin [Source:HGNC Symbol;Acc:2095]                                                                                                 |
| ENSG00000120889 | TNFRSF10B | tumor necrosis factor receptor superfamily, member 10b [Source:HGNC Symbol;Acc:11905]                                                   |
| ENSG00000122787 | AKR1D1    | aldo-keto reductase family 1, member D1 [Source:HGNC Symbol;Acc:388]                                                                    |
| ENSG00000124107 | SLPI      | secretory leukocyte peptidase inhibitor [Source:HGNC Symbol;Acc:11092]                                                                  |

|                 |          |                                                                                                                  |
|-----------------|----------|------------------------------------------------------------------------------------------------------------------|
| ENSG00000124406 | ATP8A1   | ATPase, aminophospholipid transporter (APLT), class I, type 8A, member 1 [Source:HGNC Symbol;Acc:13531]          |
| ENSG00000124721 | DNAH8    | dynein, axonemal, heavy chain 8 [Source:HGNC Symbol;Acc:2952]                                                    |
| ENSG00000125166 | GOT2     | glutamic-oxaloacetic transaminase 2, mitochondrial [Source:HGNC Symbol;Acc:4433]                                 |
| ENSG00000125255 | SLC10A2  | solute carrier family 10 (sodium/bile acid cotransporter), member 2 [Source:HGNC Symbol;Acc:10906]               |
| ENSG00000125257 | ABCC4    | ATP-binding cassette, sub-family C (CFTR/MRP), member 4 [Source:HGNC Symbol;Acc:55]                              |
| ENSG00000125952 | MAX      | MYC associated factor X [Source:HGNC Symbol;Acc:6913]                                                            |
| ENSG00000127831 | VIL1     | villin 1 [Source:HGNC Symbol;Acc:12690]                                                                          |
| ENSG00000129214 | SHBG     | sex hormone-binding globulin [Source:HGNC Symbol;Acc:10839]                                                      |
| ENSG00000130203 | APOE     | apolipoprotein E [Source:HGNC Symbol;Acc:613]                                                                    |
| ENSG00000130707 | ASS1     | argininosuccinate synthase 1 [Source:HGNC Symbol;Acc:758]                                                        |
| ENSG00000131269 | ABCB7    | ATP-binding cassette, sub-family B (MDR/TAP), member 7 [Source:HGNC Symbol;Acc:48]                               |
| ENSG00000131408 | NR1H2    | nuclear receptor subfamily 1, group H, member 2 [Source:HGNC Symbol;Acc:7965]                                    |
| ENSG00000131910 | NR0B2    | nuclear receptor subfamily 0, group B, member 2 [Source:HGNC Symbol;Acc:7961]                                    |
| ENSG00000132646 | PCNA     | proliferating cell nuclear antigen [Source:HGNC Symbol;Acc:8729]                                                 |
| ENSG00000133475 | GGT2     | gamma-glutamyltransferase 2 [Source:HGNC Symbol;Acc:4251]                                                        |
| ENSG00000134250 | NOTCH2   | notch 2 [Source:HGNC Symbol;Acc:7882]                                                                            |
| ENSG00000134460 | IL2RA    | interleukin 2 receptor, alpha [Source:HGNC Symbol;Acc:6008]                                                      |
| ENSG00000134538 | SLCO1B1  | solute carrier organic anion transporter family, member 1B1 [Source:HGNC Symbol;Acc:10959]                       |
| ENSG00000134716 | CYP2J2   | cytochrome P450, family 2, subfamily J, polypeptide 2 [Source:HGNC Symbol;Acc:2634]                              |
| ENSG00000135318 | NT5E     | 5'-nucleotidase, ecto (CD73) [Source:HGNC Symbol;Acc:8021]                                                       |
| ENSG00000135480 | KRT7     | keratin 7 [Source:HGNC Symbol;Acc:6445]                                                                          |
| ENSG00000135929 | CYP27A1  | cytochrome P450, family 27, subfamily A, polypeptide 1 [Source:HGNC Symbol;Acc:2605]                             |
| ENSG00000136244 | IL6      | interleukin 6 (interferon, beta 2) [Source:HGNC Symbol;Acc:6018]                                                 |
| ENSG00000136997 | MYC      | v-myc avian myelocytomatosis viral oncogene homolog [Source:HGNC Symbol;Acc:7553]                                |
| ENSG00000137710 | RDX      | radixin [Source:HGNC Symbol;Acc:9944]                                                                            |
| ENSG00000138061 | CYP1B1   | cytochrome P450, family 1, subfamily B, polypeptide 1 [Source:HGNC Symbol;Acc:2597]                              |
| ENSG00000138207 | RBP4     | retinol binding protein 4, plasma [Source:HGNC Symbol;Acc:9922]                                                  |
| ENSG00000138448 | ITGAV    | integrin, alpha V [Source:HGNC Symbol;Acc:6150]                                                                  |
| ENSG00000139155 | SLCO1C1  | solute carrier organic anion transporter family, member 1C1 [Source:HGNC Symbol;Acc:13819]                       |
| ENSG00000140009 | ESR2     | estrogen receptor 2 (ER beta) [Source:HGNC Symbol;Acc:3468]                                                      |
| ENSG00000140465 | CYP1A1   | cytochrome P450, family 1, subfamily A, polypeptide 1 [Source:HGNC Symbol;Acc:2595]                              |
| ENSG00000141076 | CIRH1A   | cirrhosis, autosomal recessive 1A (cirhin) [Source:HGNC Symbol;Acc:1983]                                         |
| ENSG00000141510 | TP53     | tumor protein p53 [Source:HGNC Symbol;Acc:11998]                                                                 |
| ENSG00000143257 | NR1I3    | nuclear receptor subfamily 1, group I, member 3 [Source:HGNC Symbol;Acc:7969]                                    |
| ENSG00000143515 | ATP8B2   | ATPase, aminophospholipid transporter, class I, type 8B, member 2 [Source:HGNC Symbol;Acc:13534]                 |
| ENSG00000144852 | NR1I2    | nuclear receptor subfamily 1, group I, member 2 [Source:HGNC Symbol;Acc:7968]                                    |
| ENSG00000145192 | AHSG     | alpha-2-HS-glycoprotein [Source:HGNC Symbol;Acc:349]                                                             |
| ENSG00000145495 | MARCH6   | membrane-associated ring finger (C3HC4) 6, E3 ubiquitin protein ligase [Source:HGNC Symbol;Acc:30550]            |
| ENSG00000146477 | SLC22A3  | solute carrier family 22 (organic cation transporter), member 3 [Source:HGNC Symbol;Acc:10967]                   |
| ENSG00000147454 | SLC25A37 | solute carrier family 25 (mitochondrial iron transporter), member 37 [Source:HGNC Symbol;Acc:29786]              |
| ENSG00000147571 | CRH      | corticotropin releasing hormone [Source:HGNC Symbol;Acc:2355]                                                    |
| ENSG00000148773 | MKI67    | marker of proliferation Ki-67 [Source:HGNC Symbol;Acc:7107]                                                      |
| ENSG00000148795 | CYP17A1  | cytochrome P450, family 17, subfamily A, polypeptide 1 [Source:HGNC Symbol;Acc:2593]                             |
| ENSG00000149452 | SLC22A8  | solute carrier family 22 (organic anion transporter), member 8 [Source:HGNC Symbol;Acc:10972]                    |
| ENSG00000150782 | IL18     | interleukin 18 (interferon-gamma-inducing factor) [Source:HGNC Symbol;Acc:5986]                                  |
| ENSG00000151445 | VIPAS39  | VPS33B interacting protein, apical-basolateral polarity regulator, spe-39 homolog [Source:HGNC Symbol;Acc:20347] |

|                 |          |                                                                                                                 |
|-----------------|----------|-----------------------------------------------------------------------------------------------------------------|
| ENSG00000151623 | NR3C2    | nuclear receptor subfamily 3, group C, member 2 [Source:HGNC Symbol;Acc:7979]                                   |
| ENSG00000159640 | ACE      | angiotensin I converting enzyme [Source:HGNC Symbol;Acc:2707]                                                   |
| ENSG00000160211 | G6PD     | glucose-6-phosphate dehydrogenase [Source:HGNC Symbol;Acc:4057]                                                 |
| ENSG00000160868 | CYP3A4   | cytochrome P450, family 3, subfamily A, polypeptide 4 [Source:HGNC Symbol;Acc:2637]                             |
| ENSG00000162344 | FGF19    | fibroblast growth factor 19 [Source:HGNC Symbol;Acc:3675]                                                       |
| ENSG00000162409 | PRKAA2   | protein kinase, AMP-activated, alpha 2 catalytic subunit [Source:HGNC Symbol;Acc:9377]                          |
| ENSG00000162551 | ALPL     | alkaline phosphatase, liver/bone/kidney [Source:HGNC Symbol;Acc:438]                                            |
| ENSG00000163017 | ACTG2    | actin, gamma 2, smooth muscle, enteric [Source:HGNC Symbol;Acc:145]                                             |
| ENSG00000163283 | ALPP     | alkaline phosphatase, placental [Source:HGNC Symbol;Acc:439]                                                    |
| ENSG00000163286 | ALPPL2   | alkaline phosphatase, placental-like 2 [Source:HGNC Symbol;Acc:441]                                             |
| ENSG00000163631 | ALB      | albumin [Source:HGNC Symbol;Acc:399]                                                                            |
| ENSG00000163959 | SLC51A   | solute carrier family 51, alpha subunit [Source:HGNC Symbol;Acc:29955]                                          |
| ENSG00000164062 | APEH     | acylaminoacyl-peptide hydrolase [Source:HGNC Symbol;Acc:586]                                                    |
| ENSG00000164251 | F2RL1    | coagulation factor II (thrombin) receptor-like 1 [Source:HGNC Symbol;Acc:3538]                                  |
| ENSG00000164889 | SLC4A2   | solute carrier family 4 (anion exchanger), member 2 [Source:HGNC Symbol;Acc:11028]                              |
| ENSG00000165841 | CYP2C19  | cytochrome P450, family 2, subfamily C, polypeptide 19 [Source:HGNC Symbol;Acc:2621]                            |
| ENSG00000166035 | LIPC     | lipase, hepatic [Source:HGNC Symbol;Acc:6619]                                                                   |
| ENSG00000166147 | FBN1     | fibrillin 1 [Source:HGNC Symbol;Acc:3603]                                                                       |
| ENSG00000166736 | HTR3A    | 5-hydroxytryptamine (serotonin) receptor 3A, ionotropic [Source:HGNC Symbol;Acc:5297]                           |
| ENSG00000166825 | ANPEP    | alanyl (membrane) aminopeptidase [Source:HGNC Symbol;Acc:500]                                                   |
| ENSG00000166986 | MARS     | methionyl-tRNA synthetase [Source:HGNC Symbol;Acc:6898]                                                         |
| ENSG00000167701 | GPT      | glutamic-pyruvate transaminase (alanine aminotransferase) [Source:HGNC Symbol;Acc:4552]                         |
| ENSG00000167910 | CYP7A1   | cytochrome P450, family 7, subfamily A, polypeptide 1 [Source:HGNC Symbol;Acc:2651]                             |
| ENSG00000168036 | CTNNA1   | catenin (cadherin-associated protein), beta 1, 88kDa [Source:HGNC Symbol;Acc:2514]                              |
| ENSG00000168384 | HLA-DPA1 | major histocompatibility complex, class II, DP alpha 1 [Source:HGNC Symbol;Acc:4938]                            |
| ENSG00000168610 | STAT3    | signal transducer and activator of transcription 3 (acute-phase response factor) [Source:HGNC Symbol;Acc:11364] |
| ENSG00000169856 | ONECUT1  | one cut homeobox 1 [Source:HGNC Symbol;Acc:8138]                                                                |
| ENSG00000170231 | FABP6    | fatty acid binding protein 6, ileal [Source:HGNC Symbol;Acc:3561]                                               |
| ENSG00000170458 | CD14     | CD14 molecule [Source:HGNC Symbol;Acc:1628]                                                                     |
| ENSG00000170482 | SLC23A1  | solute carrier family 23 (ascorbic acid transporter), member 1 [Source:HGNC Symbol;Acc:10974]                   |
| ENSG00000170956 | CEACAM3  | carcinoembryonic antigen-related cell adhesion molecule 3 [Source:HGNC Symbol;Acc:1815]                         |
| ENSG00000171560 | FGA      | fibrinogen alpha chain [Source:HGNC Symbol;Acc:3661]                                                            |
| ENSG00000171791 | BCL2     | B-cell CLL/lymphoma 2 [Source:HGNC Symbol;Acc:990]                                                              |
| ENSG00000172817 | CYP7B1   | cytochrome P450, family 7, subfamily B, polypeptide 1 [Source:HGNC Symbol;Acc:2652]                             |
| ENSG00000172893 | DHCR7    | 7-dehydrocholesterol reductase [Source:HGNC Symbol;Acc:2860]                                                    |
| ENSG00000173391 | OLR1     | oxidized low density lipoprotein (lectin-like) receptor 1 [Source:HGNC Symbol;Acc:8133]                         |
| ENSG00000174951 | FUT1     | fucosyltransferase 1 (galactoside 2-alpha-L-fucosyltransferase, H blood group) [Source:HGNC Symbol;Acc:4012]    |
| ENSG00000175003 | SLC22A1  | solute carrier family 22 (organic cation transporter), member 1 [Source:HGNC Symbol;Acc:10963]                  |
| ENSG00000175387 | SMAD2    | SMAD family member 2 [Source:HGNC Symbol;Acc:6768]                                                              |
| ENSG00000175445 | LPL      | lipoprotein lipase [Source:HGNC Symbol;Acc:6677]                                                                |
| ENSG00000176387 | HSD11B2  | hydroxysteroid (11-beta) dehydrogenase 2 [Source:HGNC Symbol;Acc:5209]                                          |
| ENSG00000179344 | HLA-DQB1 | major histocompatibility complex, class II, DQ beta 1 [Source:HGNC Symbol;Acc:4944]                             |
| ENSG00000180210 | F2       | coagulation factor II (thrombin) [Source:HGNC Symbol;Acc:3535]                                                  |
| ENSG00000180432 | CYP8B1   | cytochrome P450, family 8, subfamily B, polypeptide 1 [Source:HGNC Symbol;Acc:2653]                             |
| ENSG00000181092 | ADIPOQ   | adiponectin, C1Q and collagen domain containing [Source:HGNC Symbol;Acc:13633]                                  |
| ENSG00000181104 | F2R      | coagulation factor II (thrombin) receptor [Source:HGNC Symbol;Acc:3537]                                         |

|                 |          |                                                                                                                   |
|-----------------|----------|-------------------------------------------------------------------------------------------------------------------|
| ENSG00000182107 | TMEM30B  | transmembrane protein 30B [Source:HGNC Symbol;Acc:27254]                                                          |
| ENSG00000184056 | VPS33B   | vacuolar protein sorting 33 homolog B (yeast) [Source:HGNC Symbol;Acc:12712]                                      |
| ENSG00000184557 | SOCS3    | suppressor of cytokine signaling 3 [Source:HGNC Symbol;Acc:19391]                                                 |
| ENSG00000185591 | SP1      | Sp1 transcription factor [Source:HGNC Symbol;Acc:11205]                                                           |
| ENSG00000185896 | LAMP1    | lysosomal-associated membrane protein 1 [Source:HGNC Symbol;Acc:6499]                                             |
| ENSG00000186198 | SLC51B   | solute carrier family 51, beta subunit [Source:HGNC Symbol;Acc:29956]                                             |
| ENSG00000186350 | RXRA     | retinoid X receptor, alpha [Source:HGNC Symbol;Acc:10477]                                                         |
| ENSG00000186377 | CYP4X1   | cytochrome P450, family 4, subfamily X, polypeptide 1 [Source:HGNC Symbol;Acc:20244]                              |
| ENSG00000186951 | PPARA    | peroxisome proliferator-activated receptor alpha [Source:HGNC Symbol;Acc:9232]                                    |
| ENSG00000187094 | CCK      | cholecystokinin [Source:HGNC Symbol;Acc:1569]                                                                     |
| ENSG00000188379 | IFNA2    | interferon, alpha 2 [Source:HGNC Symbol;Acc:5423]                                                                 |
| ENSG00000196126 | HLA-DRB1 | major histocompatibility complex, class II, DR beta 1 [Source:HGNC Symbol;Acc:4948]                               |
| ENSG00000196735 | HLA-DQA1 | major histocompatibility complex, class II, DQ alpha 1 [Source:HGNC Symbol;Acc:4942]                              |
| ENSG00000197249 | SERPINA1 | serpin peptidase inhibitor, clade A (alpha-1 antiproteinase, antitrypsin), member 1 [Source:HGNC Symbol;Acc:8941] |
| ENSG00000197408 | CYP2B6   | cytochrome P450, family 2, subfamily B, polypeptide 6 [Source:HGNC Symbol;Acc:2615]                               |
| ENSG00000197421 | GGT3P    | gamma-glutamyltransferase 3 pseudogene [Source:HGNC Symbol;Acc:4252]                                              |
| ENSG00000197635 | DPP4     | dipeptidyl-peptidase 4 [Source:HGNC Symbol;Acc:3009]                                                              |
| ENSG00000197901 | SLC22A6  | solute carrier family 22 (organic anion transporter), member 6 [Source:HGNC Symbol;Acc:10970]                     |
| ENSG00000198646 | NCOA6    | nuclear receptor coactivator 6 [Source:HGNC Symbol;Acc:15936]                                                     |
| ENSG00000198734 | F5       | coagulation factor V (proaccelerin, labile factor) [Source:HGNC Symbol;Acc:3542]                                  |
| ENSG00000198848 | CES1     | carboxylesterase 1 [Source:HGNC Symbol;Acc:1863]                                                                  |
| ENSG00000204490 | TNF      | tumor necrosis factor [Source:HGNC Symbol;Acc:11892]                                                              |
| ENSG00000204592 | HLA-E    | major histocompatibility complex, class I, E [Source:HGNC Symbol;Acc:4962]                                        |
| ENSG00000204632 | HLA-G    | major histocompatibility complex, class I, G [Source:HGNC Symbol;Acc:4964]                                        |
| ENSG00000206237 | HLA-DQB1 | major histocompatibility complex, class II, DQ beta 1 [Source:HGNC Symbol;Acc:4944]                               |
| ENSG00000206240 | HLA-DRB1 | major histocompatibility complex, class II, DR beta 1 [Source:HGNC Symbol;Acc:4948]                               |
| ENSG00000206291 | HLA-DPA1 | major histocompatibility complex, class II, DP alpha 1 [Source:HGNC Symbol;Acc:4938]                              |
| ENSG00000206302 | HLA-DQB1 | major histocompatibility complex, class II, DQ beta 1 [Source:HGNC Symbol;Acc:4944]                               |
| ENSG00000206305 | HLA-DQA1 | major histocompatibility complex, class II, DQ alpha 1 [Source:HGNC Symbol;Acc:4942]                              |
| ENSG00000206306 | HLA-DRB1 | major histocompatibility complex, class II, DR beta 1 [Source:HGNC Symbol;Acc:4948]                               |
| ENSG00000206439 | TNF      | tumor necrosis factor [Source:HGNC Symbol;Acc:11892]                                                              |
| ENSG00000206450 | HLA-B    | major histocompatibility complex, class I, B [Source:HGNC Symbol;Acc:4932]                                        |
| ENSG00000206493 | HLA-E    | major histocompatibility complex, class I, E [Source:HGNC Symbol;Acc:4962]                                        |
| ENSG00000206506 | HLA-G    | major histocompatibility complex, class I, G [Source:HGNC Symbol;Acc:4964]                                        |
| ENSG00000213398 | LCAT     | lecithin-cholesterol acyltransferase [Source:HGNC Symbol;Acc:6522]                                                |
| ENSG00000223532 | HLA-B    | major histocompatibility complex, class I, B [Source:HGNC Symbol;Acc:4932]                                        |
| ENSG00000223952 | TNF      | tumor necrosis factor [Source:HGNC Symbol;Acc:11892]                                                              |
| ENSG00000224103 | HLA-DPA1 | major histocompatibility complex, class II, DP alpha 1 [Source:HGNC Symbol;Acc:4938]                              |
| ENSG00000224608 | HLA-B    | major histocompatibility complex, class I, B [Source:HGNC Symbol;Acc:4932]                                        |
| ENSG00000225201 | HLA-E    | major histocompatibility complex, class I, E [Source:HGNC Symbol;Acc:4962]                                        |
| ENSG00000225824 | HLA-DQB1 | major histocompatibility complex, class II, DQ beta 1 [Source:HGNC Symbol;Acc:4944]                               |
| ENSG00000225890 | HLA-DQA1 | major histocompatibility complex, class II, DQ alpha 1 [Source:HGNC Symbol;Acc:4942]                              |
| ENSG00000228080 | HLA-DRB1 | major histocompatibility complex, class II, DR beta 1 [Source:HGNC Symbol;Acc:4948]                               |
| ENSG00000228163 | HLA-DPA1 | major histocompatibility complex, class II, DP alpha 1 [Source:HGNC Symbol;Acc:4938]                              |
| ENSG00000228284 | HLA-DQA1 | major histocompatibility complex, class II, DQ alpha 1 [Source:HGNC Symbol;Acc:4942]                              |
| ENSG00000228321 | TNF      | tumor necrosis factor [Source:HGNC Symbol;Acc:11892]                                                              |

|                 |          |                                                                                                                                         |
|-----------------|----------|-----------------------------------------------------------------------------------------------------------------------------------------|
| ENSG00000228849 | TNF      | tumor necrosis factor [Source:HGNC Symbol;Acc:11892]                                                                                    |
| ENSG00000228964 | HLA-B    | major histocompatibility complex, class I, B [Source:HGNC Symbol;Acc:4932]                                                              |
| ENSG00000228978 | TNF      | tumor necrosis factor [Source:HGNC Symbol;Acc:11892]                                                                                    |
| ENSG00000229074 | HLA-DRB1 | major histocompatibility complex, class II, DR beta 1 [Source:HGNC Symbol;Acc:4948]                                                     |
| ENSG00000229252 | HLA-E    | major histocompatibility complex, class I, E [Source:HGNC Symbol;Acc:4962]                                                              |
| ENSG00000229685 | HLA-DPA1 | major histocompatibility complex, class II, DP alpha 1 [Source:HGNC Symbol;Acc:4938]                                                    |
| ENSG00000230108 | TNF      | tumor necrosis factor [Source:HGNC Symbol;Acc:11892]                                                                                    |
| ENSG00000230254 | HLA-E    | major histocompatibility complex, class I, E [Source:HGNC Symbol;Acc:4962]                                                              |
| ENSG00000230413 | HLA-G    | major histocompatibility complex, class I, G [Source:HGNC Symbol;Acc:4964]                                                              |
| ENSG00000231286 | HLA-DQB1 | major histocompatibility complex, class II, DQ beta 1 [Source:HGNC Symbol;Acc:4944]                                                     |
| ENSG00000231389 | HLA-DPA1 | major histocompatibility complex, class II, DP alpha 1 [Source:HGNC Symbol;Acc:4938]                                                    |
| ENSG00000231939 | HLA-DQB1 | major histocompatibility complex, class II, DQ beta 1 [Source:HGNC Symbol;Acc:4944]                                                     |
| ENSG00000232062 | HLA-DQA1 | major histocompatibility complex, class II, DQ alpha 1 [Source:HGNC Symbol;Acc:4942]                                                    |
| ENSG00000232126 | HLA-B    | major histocompatibility complex, class I, B [Source:HGNC Symbol;Acc:4932]                                                              |
| ENSG00000232810 | TNF      | tumor necrosis factor [Source:HGNC Symbol;Acc:11892]                                                                                    |
| ENSG00000233095 | HLA-G    | major histocompatibility complex, class I, G [Source:HGNC Symbol;Acc:4964]                                                              |
| ENSG00000233209 | HLA-DQB1 | major histocompatibility complex, class II, DQ beta 1 [Source:HGNC Symbol;Acc:4944]                                                     |
| ENSG00000233904 | HLA-E    | major histocompatibility complex, class I, E [Source:HGNC Symbol;Acc:4962]                                                              |
| ENSG00000234745 | HLA-B    | major histocompatibility complex, class I, B [Source:HGNC Symbol;Acc:4932]                                                              |
| ENSG00000235346 | HLA-G    | major histocompatibility complex, class I, G [Source:HGNC Symbol;Acc:4964]                                                              |
| ENSG00000235680 | HLA-G    | major histocompatibility complex, class I, G [Source:HGNC Symbol;Acc:4964]                                                              |
| ENSG00000235844 | HLA-DPA1 | major histocompatibility complex, class II, DP alpha 1 [Source:HGNC Symbol;Acc:4938]                                                    |
| ENSG00000236177 | HLA-DPA1 | major histocompatibility complex, class II, DP alpha 1 [Source:HGNC Symbol;Acc:4938]                                                    |
| ENSG00000236418 | HLA-DQA1 | major histocompatibility complex, class II, DQ alpha 1 [Source:HGNC Symbol;Acc:4942]                                                    |
| ENSG00000236632 | HLA-E    | major histocompatibility complex, class I, E [Source:HGNC Symbol;Acc:4962]                                                              |
| ENSG00000236884 | HLA-DRB1 | major histocompatibility complex, class II, DR beta 1 [Source:HGNC Symbol;Acc:4948]                                                     |
| ENSG00000237216 | HLA-G    | major histocompatibility complex, class I, G [Source:HGNC Symbol;Acc:4964]                                                              |
| ENSG00000242110 | AMACR    | alpha-methylacyl-CoA racemase [Source:HGNC Symbol;Acc:451]                                                                              |
| ENSG00000242252 | BGLAP    | bone gamma-carboxyglutamate (gla) protein [Source:HGNC Symbol;Acc:1043]                                                                 |
| ENSG00000243135 | UGT1A3   | UDP glucuronosyltransferase 1 family, polypeptide A3 [Source:HGNC Symbol;Acc:12535]                                                     |
| ENSG00000250361 | GYPB     | glycophorin B (MNS blood group) [Source:HGNC Symbol;Acc:4703]                                                                           |
| ENSG00000255974 | CYP2A6   | cytochrome P450, family 2, subfamily A, polypeptide 6 [Source:HGNC Symbol;Acc:2610]                                                     |
| ENSG00000262243 | CES1     | carboxylesterase 1 [Source:HGNC Symbol;Acc:1863]                                                                                        |
| ENSG00000262788 | CIRH1A   | cirrhosis, autosomal recessive 1A (cirhin) [Source:HGNC Symbol;Acc:1983]                                                                |
| ENSG00000262933 | CALCA    | calcitonin-related polypeptide alpha [Source:HGNC Symbol;Acc:1437]                                                                      |
| ENSG00000263298 | ABCB11   | ATP-binding cassette, sub-family B (MDR/TAP), member 11 [Source:HGNC Symbol;Acc:42]                                                     |
| ENSG00000269087 | G6PD     | glucose-6-phosphate dehydrogenase [Source:HGNC Symbol;Acc:4057]                                                                         |
| ENSG00000269571 | RXRA     | retinoid X receptor, alpha [Source:HGNC Symbol;Acc:10477]                                                                               |
| ENSG00000272611 | CEACAM3  | carcinoembryonic antigen-related cell adhesion molecule 3 [Source:HGNC Symbol;Acc:1815]                                                 |
| ENSG00000272743 | CEACAM5  | carcinoembryonic antigen-related cell adhesion molecule 5 [Source:HGNC Symbol;Acc:1817]                                                 |
| LRG_112         | LRG_112  | signal transducer and activator of transcription 3 (acute-phase response factor) [Source:HGNC Symbol;Acc:11364]                         |
| LRG_13          | LRG_13   | calcitonin-related polypeptide alpha [Source:HGNC Symbol;Acc:1437]                                                                      |
| LRG_148         | LRG_148  | glucose-6-phosphate dehydrogenase [Source:HGNC Symbol;Acc:4057]                                                                         |
| LRG_321         | LRG_321  | tumor protein p53 [Source:HGNC Symbol;Acc:11998]                                                                                        |
| LRG_340         | LRG_340  | 7-dehydrocholesterol reductase [Source:HGNC Symbol;Acc:2860]                                                                            |
| LRG_71          | LRG_71   | interleukin 12B (natural killer cell stimulatory factor 2, cytotoxic lymphocyte maturation factor 2, p40) [Source:HGNC Symbol;Acc:5970] |

|         |         |                                                             |
|---------|---------|-------------------------------------------------------------|
| LRG_715 | LRG_715 | arginine vasopressin [Source:HGNC Symbol;Acc:894]           |
| LRG_73  | LRG_73  | interleukin 2 receptor, alpha [Source:HGNC Symbol;Acc:6008] |
| LRG_84  | LRG_84  | myeloperoxidase [Source:HGNC Symbol;Acc:7218]               |

| Reactome lipid metabolism |                      |                                                                                                         |
|---------------------------|----------------------|---------------------------------------------------------------------------------------------------------|
| Ensembl.Gene.ID           | Associated.Gene.Name | Description                                                                                             |
| ENSG00000001167           | NFYA                 | nuclear transcription factor Y, alpha [Source:HGNC Symbol;Acc:7804]                                     |
| ENSG00000001630           | CYP51A1              | cytochrome P450, family 51, subfamily A, polypeptide 1 [Source:HGNC Symbol;Acc:2649]                    |
| ENSG00000003987           | MTMR7                | myotubularin related protein 7 [Source:HGNC Symbol;Acc:7454]                                            |
| ENSG00000005339           | CREBBP               | CREB binding protein [Source:HGNC Symbol;Acc:2348]                                                      |
| ENSG00000005469           | CROT                 | carnitine O-octanoyltransferase [Source:HGNC Symbol;Acc:2366]                                           |
| ENSG00000005471           | ABCB4                | ATP-binding cassette, sub-family B (MDR/TAP), member 4 [Source:HGNC Symbol;Acc:45]                      |
| ENSG00000006756           | ARSD                 | arylsulfatase D [Source:HGNC Symbol;Acc:717]                                                            |
| ENSG00000007866           | TEAD3                | TEA domain family member 3 [Source:HGNC Symbol;Acc:11716]                                               |
| ENSG00000008838           | MED24                | mediator complex subunit 24 [Source:HGNC Symbol;Acc:22963]                                              |
| ENSG00000011198           | ABHD5                | abhydrolase domain containing 5 [Source:HGNC Symbol;Acc:21396]                                          |
| ENSG00000011405           | PIK3C2A              | phosphatidylinositol-4-phosphate 3-kinase, catalytic subunit type 2 alpha [Source:HGNC Symbol;Acc:8971] |
| ENSG00000012174           | MBTPS2               | membrane-bound transcription factor peptidase, site 2 [Source:HGNC Symbol;Acc:15455]                    |
| ENSG00000012660           | ELOVL5               | ELOVL fatty acid elongase 5 [Source:HGNC Symbol;Acc:21308]                                              |
| ENSG00000012779           | ALOX5                | arachidonate 5-lipoxygenase [Source:HGNC Symbol;Acc:435]                                                |
| ENSG00000015413           | DPEP1                | dipeptidase 1 (renal) [Source:HGNC Symbol;Acc:3002]                                                     |
| ENSG00000015520           | NPC1L1               | NPC1-like 1 [Source:HGNC Symbol;Acc:7898]                                                               |
| ENSG00000018408           | WWTR1                | WW domain containing transcription regulator 1 [Source:HGNC Symbol;Acc:24042]                           |
| ENSG00000018510           | AGPS                 | alkylglycerone phosphate synthase [Source:HGNC Symbol;Acc:327]                                          |
| ENSG00000019186           | CYP24A1              | cytochrome P450, family 24, subfamily A, polypeptide 1 [Source:HGNC Symbol;Acc:2602]                    |
| ENSG00000023330           | ALAS1                | aminolevulinic acid, delta-, synthase 1 [Source:HGNC Symbol;Acc:396]                                    |
| ENSG00000026652           | AGPAT4               | 1-acylglycerol-3-phosphate O-acyltransferase 4 [Source:HGNC Symbol;Acc:20885]                           |
| ENSG00000036530           | CYP46A1              | cytochrome P450, family 46, subfamily A, polypeptide 1 [Source:HGNC Symbol;Acc:2641]                    |
| ENSG00000038210           | PI4K2B               | phosphatidylinositol 4-kinase type 2 beta [Source:HGNC Symbol;Acc:18215]                                |
| ENSG00000040933           | INPP4A               | inositol polyphosphate-4-phosphatase, type I, 107kDa [Source:HGNC Symbol;Acc:6074]                      |
| ENSG00000042429           | MED17                | mediator complex subunit 17 [Source:HGNC Symbol;Acc:2375]                                               |
| ENSG00000049860           | HEXB                 | hexosaminidase B (beta polypeptide) [Source:HGNC Symbol;Acc:4879]                                       |
| ENSG00000051382           | PIK3CB               | phosphatidylinositol-4,5-bisphosphate 3-kinase, catalytic subunit beta [Source:HGNC Symbol;Acc:8976]    |
| ENSG00000052802           | MSMO1                | methylsterol monooxygenase 1 [Source:HGNC Symbol;Acc:10545]                                             |
| ENSG00000054983           | GALC                 | galactosylceramidase [Source:HGNC Symbol;Acc:4115]                                                      |
| ENSG00000059377           | TBXAS1               | thromboxane A synthase 1 (platelet) [Source:HGNC Symbol;Acc:11609]                                      |
| ENSG00000060971           | ACAA1                | acetyl-CoA acyltransferase 1 [Source:HGNC Symbol;Acc:82]                                                |
| ENSG00000062096           | ARSF                 | arylsulfatase F [Source:HGNC Symbol;Acc:721]                                                            |
| ENSG00000062282           | DGAT2                | diacylglycerol O-acyltransferase 2 [Source:HGNC Symbol;Acc:16940]                                       |
| ENSG00000063176           | SPHK2                | sphingosine kinase 2 [Source:HGNC Symbol;Acc:18859]                                                     |
| ENSG00000063322           | MED29                | mediator complex subunit 29 [Source:HGNC Symbol;Acc:23074]                                              |
| ENSG00000063601           | MTMR1                | myotubularin related protein 1 [Source:HGNC Symbol;Acc:7449]                                            |
| ENSG00000064601           | CTSA                 | cathepsin A [Source:HGNC Symbol;Acc:9251]                                                               |
| ENSG00000064763           | FAR2                 | fatty acyl CoA reductase 2 [Source:HGNC Symbol;Acc:25531]                                               |
| ENSG00000065833           | ME1                  | malic enzyme 1, NADP(+)-dependent, cytosolic [Source:HGNC Symbol;Acc:6983]                              |
| ENSG00000066136           | NFYC                 | nuclear transcription factor Y, gamma [Source:HGNC Symbol;Acc:7806]                                     |
| ENSG00000066322           | ELOVL1               | ELOVL fatty acid elongase 1 [Source:HGNC Symbol;Acc:14418]                                              |
| ENSG00000067064           | IDI1                 | isopentenyl-diphosphate delta isomerase 1 [Source:HGNC Symbol;Acc:5387]                                 |
| ENSG00000067113           | PPAP2A               | phosphatidic acid phosphatase type 2A [Source:HGNC Symbol;Acc:9228]                                     |
| ENSG00000068366           | ACSL4                | acyl-CoA synthetase long-chain family member 4 [Source:HGNC Symbol;Acc:3571]                            |



|                |         |                                                                                                                                                |
|----------------|---------|------------------------------------------------------------------------------------------------------------------------------------------------|
| ENSG0000069667 | RORA    | RAR-related orphan receptor A [Source:HGNC Symbol;Acc:10258]                                                                                   |
| ENSG0000069764 | PLA2G10 | phospholipase A2, group X [Source:HGNC Symbol;Acc:9029]                                                                                        |
| ENSG0000070214 | SLC44A1 | solute carrier family 44 (choline transporter), member 1 [Source:HGNC Symbol;Acc:18798]                                                        |
| ENSG0000070610 | GBA2    | glucosidase, beta (bile acid) 2 [Source:HGNC Symbol;Acc:18986]                                                                                 |
| ENSG0000070748 | CHAT    | choline O-acetyltransferase [Source:HGNC Symbol;Acc:1912]                                                                                      |
| ENSG0000072062 | PRKACA  | protein kinase, cAMP-dependent, catalytic, alpha [Source:HGNC Symbol;Acc:9380]                                                                 |
| ENSG0000072310 | SREBF1  | sterol regulatory element binding transcription factor 1 [Source:HGNC Symbol;Acc:11289]                                                        |
| ENSG0000072444 | ASAH2C  | N-acylsphingosine amidohydrolase (non-lysosomal ceramidase) 2C [Source:HGNC Symbol;Acc:23457]                                                  |
| ENSG0000072778 | ACADVL  | acyl-CoA dehydrogenase, very long chain [Source:HGNC Symbol;Acc:92]                                                                            |
| ENSG0000073060 | SCARB1  | scavenger receptor class B, member 1 [Source:HGNC Symbol;Acc:1664]                                                                             |
| ENSG0000073734 | ABCB11  | ATP-binding cassette, sub-family B (MDR/TAP), member 11 [Source:HGNC Symbol;Acc:42]                                                            |
| ENSG0000073756 | PTGS2   | prostaglandin-endoperoxide synthase 2 (prostaglandin G/H synthase and cyclooxygenase) [Source:HGNC Symbol;Acc:9605]                            |
| ENSG0000074219 | TEAD2   | TEA domain family member 2 [Source:HGNC Symbol;Acc:11715]                                                                                      |
| ENSG0000074416 | MGLL    | monoglyceride lipase [Source:HGNC Symbol;Acc:17038]                                                                                            |
| ENSG0000075239 | ACAT1   | acetyl-CoA acetyltransferase 1 [Source:HGNC Symbol;Acc:93]                                                                                     |
| ENSG0000075651 | PLD1    | phospholipase D1, phosphatidylcholine-specific [Source:HGNC Symbol;Acc:9067]                                                                   |
| ENSG0000076555 | ACACB   | acetyl-CoA carboxylase beta [Source:HGNC Symbol;Acc:85]                                                                                        |
| ENSG0000078124 | ACER3   | alkaline ceramidase 3 [Source:HGNC Symbol;Acc:16066]                                                                                           |
| ENSG0000078142 | PIK3C3  | phosphatidylinositol 3-kinase, catalytic subunit type 3 [Source:HGNC Symbol;Acc:8974]                                                          |
| ENSG0000078269 | SYNJ2   | synaptojanin 2 [Source:HGNC Symbol;Acc:11504]                                                                                                  |
| ENSG0000079435 | LIPE    | lipase, hormone-sensitive [Source:HGNC Symbol;Acc:6621]                                                                                        |
| ENSG0000079459 | FDFT1   | farnesyl-diphosphate farnesyltransferase 1 [Source:HGNC Symbol;Acc:3629]                                                                       |
| ENSG0000081479 | LRP2    | low density lipoprotein receptor-related protein 2 [Source:HGNC Symbol;Acc:6694]                                                               |
| ENSG0000082014 | SMARCD3 | SWI/SNF related, matrix associated, actin dependent regulator of chromatin, subfamily d, member 3 [Source:HGNC Symbol;Acc:11108]               |
| ENSG0000083720 | OXCT1   | 3-oxoacid CoA transferase 1 [Source:HGNC Symbol;Acc:8527]                                                                                      |
| ENSG0000083807 | SLC27A5 | solute carrier family 27 (fatty acid transporter), member 5 [Source:HGNC Symbol;Acc:10999]                                                     |
| ENSG0000084453 | SLCO1A2 | solute carrier organic anion transporter family, member 1A2 [Source:HGNC Symbol;Acc:10956]                                                     |
| ENSG0000084674 | APOB    | apolipoprotein B [Source:HGNC Symbol;Acc:603]                                                                                                  |
| ENSG0000084676 | NCOA1   | nuclear receptor coactivator 1 [Source:HGNC Symbol;Acc:7668]                                                                                   |
| ENSG0000084754 | HADHA   | hydroxyacyl-CoA dehydrogenase/3-ketoacyl-CoA thiolase/enoyl-CoA hydratase (trifunctional protein), alpha subunit [Source:HGNC Symbol;Acc:4801] |
| ENSG0000085662 | AKR1B1  | aldo-keto reductase family 1, member B1 (aldose reductase) [Source:HGNC Symbol;Acc:381]                                                        |
| ENSG0000087008 | ACOX3   | acyl-CoA oxidase 3, pristanoyl [Source:HGNC Symbol;Acc:121]                                                                                    |
| ENSG0000087053 | MTMR2   | myotubularin related protein 2 [Source:HGNC Symbol;Acc:7450]                                                                                   |
| ENSG0000087085 | ACHE    | acetylcholinesterase (Yt blood group) [Source:HGNC Symbol;Acc:108]                                                                             |
| ENSG0000087157 | PGS1    | phosphatidylglycerophosphate synthase 1 [Source:HGNC Symbol;Acc:30029]                                                                         |
| ENSG0000087237 | CETP    | cholesteryl ester transfer protein, plasma [Source:HGNC Symbol;Acc:1869]                                                                       |
| ENSG0000087253 | LPCAT2  | lysophosphatidylcholine acyltransferase 2 [Source:HGNC Symbol;Acc:26032]                                                                       |
| ENSG0000088766 | CRLS1   | cardiolipin synthase 1 [Source:HGNC Symbol;Acc:16148]                                                                                          |
| ENSG0000090054 | SPTLC1  | serine palmitoyltransferase, long chain base subunit 1 [Source:HGNC Symbol;Acc:11277]                                                          |
| ENSG0000090661 | CERS4   | ceramide synthase 4 [Source:HGNC Symbol;Acc:23747]                                                                                             |
| ENSG0000095303 | PTGS1   | prostaglandin-endoperoxide synthase 1 (prostaglandin G/H synthase and cyclooxygenase) [Source:HGNC Symbol;Acc:9604]                            |
| ENSG0000095321 | CRAT    | carnitine O-acetyltransferase [Source:HGNC Symbol;Acc:2342]                                                                                    |
| ENSG0000099377 | HSD3B7  | hydroxy-delta-5-steroid dehydrogenase, 3 beta- and steroid delta-isomerase 7 [Source:HGNC Symbol;Acc:18324]                                    |
| ENSG0000099797 | TECR    | trans-2,3-enoyl-CoA reductase [Source:HGNC Symbol;Acc:4551]                                                                                    |
| ENSG0000099917 | MED15   | mediator complex subunit 15 [Source:HGNC Symbol;Acc:14248]                                                                                     |
| ENSG0000099998 | GGT5    | gamma-glutamyltransferase 5 [Source:HGNC Symbol;Acc:4260]                                                                                      |

|                 |          |                                                                                                                                 |
|-----------------|----------|---------------------------------------------------------------------------------------------------------------------------------|
| ENSG00000100031 | GGT1     | gamma-glutamyltransferase 1 [Source:HGNC Symbol;Acc:4250]                                                                       |
| ENSG00000100075 | SLC25A1  | solute carrier family 25 (mitochondrial carrier; citrate transporter), member 1 [Source:HGNC Symbol;Acc:10979]                  |
| ENSG00000100078 | PLA2G3   | phospholipase A2, group III [Source:HGNC Symbol;Acc:17934]                                                                      |
| ENSG00000100288 | CHKB     | choline kinase beta [Source:HGNC Symbol;Acc:1938]                                                                               |
| ENSG00000100299 | ARSA     | arylsulfatase A [Source:HGNC Symbol;Acc:713]                                                                                    |
| ENSG00000100330 | MTMR3    | myotubularin related protein 3 [Source:HGNC Symbol;Acc:7451]                                                                    |
| ENSG00000100344 | PNPLA3   | patatin-like phospholipase domain containing 3 [Source:HGNC Symbol;Acc:18590]                                                   |
| ENSG00000100372 | SLC25A17 | solute carrier family 25 (mitochondrial carrier; peroxisomal membrane protein, 34kDa), member 17 [Source:HGNC Symbol;Acc:10987] |
| ENSG00000100393 | EP300    | E1A binding protein p300 [Source:HGNC Symbol;Acc:3373]                                                                          |
| ENSG00000100422 | CERK     | ceramide kinase [Source:HGNC Symbol;Acc:19256]                                                                                  |
| ENSG00000100596 | SPTLC2   | serine palmitoyltransferase, long chain base subunit 2 [Source:HGNC Symbol;Acc:11278]                                           |
| ENSG00000100600 | LGMN     | legumain [Source:HGNC Symbol;Acc:9472]                                                                                          |
| ENSG00000100652 | SLC10A1  | solute carrier family 10 (sodium/bile acid cotransporter), member 1 [Source:HGNC Symbol;Acc:10905]                              |
| ENSG00000100934 | SEC23A   | Sec23 homolog A (S. cerevisiae) [Source:HGNC Symbol;Acc:10701]                                                                  |
| ENSG00000100979 | PLTP     | phospholipid transfer protein [Source:HGNC Symbol;Acc:9093]                                                                     |
| ENSG00000101255 | TRIB3    | tribbles pseudokinase 3 [Source:HGNC Symbol;Acc:16228]                                                                          |
| ENSG00000101290 | CDS2     | CDP-diacylglycerol synthase (phosphatidate cytidyltransferase) 2 [Source:HGNC Symbol;Acc:1801]                                  |
| ENSG00000101473 | ACOT8    | acyl-CoA thioesterase 8 [Source:HGNC Symbol;Acc:15919]                                                                          |
| ENSG00000101558 | VAPA     | VAMP (vesicle-associated membrane protein)-associated protein A, 33kDa [Source:HGNC Symbol;Acc:12648]                           |
| ENSG00000101577 | LPIN2    | lipin 2 [Source:HGNC Symbol;Acc:14450]                                                                                          |
| ENSG00000101846 | STS      | steroid sulfatase (microsomal), isozyme S [Source:HGNC Symbol;Acc:11425]                                                        |
| ENSG00000101849 | TBL1X    | transducin (beta)-like 1X-linked [Source:HGNC Symbol;Acc:11585]                                                                 |
| ENSG00000101986 | ABCD1    | ATP-binding cassette, sub-family D (ALD), member 1 [Source:HGNC Symbol;Acc:61]                                                  |
| ENSG00000102125 | TAZ      | tafazzin [Source:HGNC Symbol;Acc:11577]                                                                                         |
| ENSG00000102230 | PCYT1B   | phosphate cytidyltransferase 1, choline, beta [Source:HGNC Symbol;Acc:8755]                                                     |
| ENSG00000102393 | GLA      | galactosidase, alpha [Source:HGNC Symbol;Acc:4296]                                                                              |
| ENSG00000103043 | VAC14    | Vac14 homolog (S. cerevisiae) [Source:HGNC Symbol;Acc:25507]                                                                    |
| ENSG00000103056 | SMPD3    | sphingomyelin phosphodiesterase 3, neutral membrane (neutral sphingomyelinase II) [Source:HGNC Symbol;Acc:14240]                |
| ENSG00000103150 | MLYCD    | malonyl-CoA decarboxylase [Source:HGNC Symbol;Acc:7150]                                                                         |
| ENSG00000103222 | ABCC1    | ATP-binding cassette, sub-family C (CFTR/MRP), member 1 [Source:HGNC Symbol;Acc:51]                                             |
| ENSG00000103502 | CDIPT    | CDP-diacylglycerol--inositol 3-phosphatidyltransferase [Source:HGNC Symbol;Acc:1769]                                            |
| ENSG00000104325 | DECR1    | 2,4-dienoyl CoA reductase 1, mitochondrial [Source:HGNC Symbol;Acc:2753]                                                        |
| ENSG00000104549 | SQLE     | squalene epoxidase [Source:HGNC Symbol;Acc:11279]                                                                               |
| ENSG00000104763 | ASAH1    | N-acylsphingosine amidohydrolase (acid ceramidase) 1 [Source:HGNC Symbol;Acc:735]                                               |
| ENSG00000104826 | LHB      | luteinizing hormone beta polypeptide [Source:HGNC Symbol;Acc:6584]                                                              |
| ENSG00000104973 | MED25    | mediator complex subunit 25 [Source:HGNC Symbol;Acc:28845]                                                                      |
| ENSG00000105085 | MED26    | mediator complex subunit 26 [Source:HGNC Symbol;Acc:2376]                                                                       |
| ENSG00000105223 | PLD3     | phospholipase D family, member 3 [Source:HGNC Symbol;Acc:17158]                                                                 |
| ENSG00000105398 | SULT2A1  | sulfotransferase family, cytosolic, 2A, dehydroepiandrosterone (DHEA)-preferring, member 1 [Source:HGNC Symbol;Acc:11458]       |
| ENSG00000105499 | PLA2G4C  | phospholipase A2, group IVC (cytosolic, calcium-independent) [Source:HGNC Symbol;Acc:9037]                                      |
| ENSG00000105647 | PIK3R2   | phosphoinositide-3-kinase, regulatory subunit 2 (beta) [Source:HGNC Symbol;Acc:8980]                                            |
| ENSG00000105851 | PIK3CG   | phosphatidylinositol-4,5-bisphosphate 3-kinase, catalytic subunit gamma [Source:HGNC Symbol;Acc:8978]                           |
| ENSG00000105974 | CAV1     | caveolin 1, caveolae protein, 22kDa [Source:HGNC Symbol;Acc:1527]                                                               |
| ENSG00000106459 | NRF1     | nuclear respiratory factor 1 [Source:HGNC Symbol;Acc:7996]                                                                      |
| ENSG00000106617 | PRKAG2   | protein kinase, AMP-activated, gamma 2 non-catalytic subunit [Source:HGNC Symbol;Acc:9386]                                      |
| ENSG00000106853 | PTGR1    | prostaglandin reductase 1 [Source:HGNC Symbol;Acc:18429]                                                                        |

|                 |          |                                                                                                                |
|-----------------|----------|----------------------------------------------------------------------------------------------------------------|
| ENSG00000107242 | PIP5K1B  | phosphatidylinositol-4-phosphate 5-kinase, type I, beta [Source:HGNC Symbol;Acc:8995]                          |
| ENSG00000107317 | PTGDS    | prostaglandin D2 synthase 21kDa (brain) [Source:HGNC Symbol;Acc:9592]                                          |
| ENSG00000107537 | PHYH     | phytanoyl-CoA 2-hydroxylase [Source:HGNC Symbol;Acc:8940]                                                      |
| ENSG00000107611 | CUBN     | cubilin (intrinsic factor-cobalamin receptor) [Source:HGNC Symbol;Acc:2548]                                    |
| ENSG00000108389 | MTMR4    | myotubularin related protein 4 [Source:HGNC Symbol;Acc:7452]                                                   |
| ENSG00000108424 | KPNB1    | karyopherin (importin) beta 1 [Source:HGNC Symbol;Acc:6400]                                                    |
| ENSG00000108510 | MED13    | mediator complex subunit 13 [Source:HGNC Symbol;Acc:22474]                                                     |
| ENSG00000108590 | MED31    | mediator complex subunit 31 [Source:HGNC Symbol;Acc:24260]                                                     |
| ENSG00000108786 | HSD17B1  | hydroxysteroid (17-beta) dehydrogenase 1 [Source:HGNC Symbol;Acc:5210]                                         |
| ENSG00000108839 | ALOX12   | arachidonate 12-lipoxygenase [Source:HGNC Symbol;Acc:429]                                                      |
| ENSG00000108846 | ABCC3    | ATP-binding cassette, sub-family C (CFTR/MRP), member 3 [Source:HGNC Symbol;Acc:54]                            |
| ENSG00000109452 | INPP4B   | inositol polyphosphate-4-phosphatase, type II, 105kDa [Source:HGNC Symbol;Acc:6075]                            |
| ENSG00000109819 | PPARGC1A | peroxisome proliferator-activated receptor gamma, coactivator 1 alpha [Source:HGNC Symbol;Acc:9237]            |
| ENSG00000109929 | SC5D     | sterol-C5-desaturase [Source:HGNC Symbol;Acc:10547]                                                            |
| ENSG00000110048 | OSBP     | oxysterol binding protein [Source:HGNC Symbol;Acc:8503]                                                        |
| ENSG00000110090 | CPT1A    | carnitine palmitoyltransferase 1A (liver) [Source:HGNC Symbol;Acc:2328]                                        |
| ENSG00000110243 | APOA5    | apolipoprotein A-V [Source:HGNC Symbol;Acc:17288]                                                              |
| ENSG00000110244 | APOA4    | apolipoprotein A-IV [Source:HGNC Symbol;Acc:602]                                                               |
| ENSG00000110245 | APOC3    | apolipoprotein C-III [Source:HGNC Symbol;Acc:610]                                                              |
| ENSG00000110536 | PTPMT1   | protein tyrosine phosphatase, mitochondrial 1 [Source:HGNC Symbol;Acc:26965]                                   |
| ENSG00000110721 | CHKA     | choline kinase alpha [Source:HGNC Symbol;Acc:1937]                                                             |
| ENSG00000110871 | COQ5     | coenzyme Q5 homolog, methyltransferase ( <i>S. cerevisiae</i> ) [Source:HGNC Symbol;Acc:28722]                 |
| ENSG00000110921 | MVK      | mevalonate kinase [Source:HGNC Symbol;Acc:7530]                                                                |
| ENSG00000110958 | PTGES3   | prostaglandin E synthase 3 (cytosolic) [Source:HGNC Symbol;Acc:16049]                                          |
| ENSG00000111012 | CYP27B1  | cytochrome P450, family 27, subfamily B, polypeptide 1 [Source:HGNC Symbol;Acc:2606]                           |
| ENSG00000111144 | LTA4H    | leukotriene A4 hydrolase [Source:HGNC Symbol;Acc:6710]                                                         |
| ENSG00000111666 | CHPT1    | choline phosphotransferase 1 [Source:HGNC Symbol;Acc:17852]                                                    |
| ENSG00000111684 | LPCAT3   | lysophosphatidylcholine acyltransferase 3 [Source:HGNC Symbol;Acc:30244]                                       |
| ENSG00000111700 | SLCO1B3  | solute carrier organic anion transporter family, member 1B3 [Source:HGNC Symbol;Acc:10961]                     |
| ENSG00000112237 | CCNC     | cyclin C [Source:HGNC Symbol;Acc:1581]                                                                         |
| ENSG00000112282 | MED23    | mediator complex subunit 23 [Source:HGNC Symbol;Acc:2372]                                                      |
| ENSG00000112367 | FIG4     | FIG4 homolog, SAC1 lipid phosphatase domain containing ( <i>S. cerevisiae</i> ) [Source:HGNC Symbol;Acc:16873] |
| ENSG00000112972 | HMGCS1   | 3-hydroxy-3-methylglutaryl-CoA synthase 1 (soluble) [Source:HGNC Symbol;Acc:5007]                              |
| ENSG00000113161 | HMGCR    | 3-hydroxy-3-methylglutaryl-CoA reductase [Source:HGNC Symbol;Acc:5006]                                         |
| ENSG00000113163 | COL4A3BP | collagen, type IV, alpha 3 (Goodpasture antigen) binding protein [Source:HGNC Symbol;Acc:2205]                 |
| ENSG00000113273 | ARSB     | arylsulfatase B [Source:HGNC Symbol;Acc:714]                                                                   |
| ENSG00000113615 | SEC24A   | SEC24 family member A [Source:HGNC Symbol;Acc:10703]                                                           |
| ENSG00000114054 | PCCB     | propionyl CoA carboxylase, beta polypeptide [Source:HGNC Symbol;Acc:8654]                                      |
| ENSG00000114200 | BCHE     | butyrylcholinesterase [Source:HGNC Symbol;Acc:983]                                                             |
| ENSG00000114650 | SCAP     | SREBF chaperone [Source:HGNC Symbol;Acc:30634]                                                                 |
| ENSG00000115020 | PIKFYVE  | phosphoinositide kinase, FYVE finger containing [Source:HGNC Symbol;Acc:23785]                                 |
| ENSG00000115138 | POMC     | proopiomelanocortin [Source:HGNC Symbol;Acc:9201]                                                              |
| ENSG00000115159 | GPD2     | glycerol-3-phosphate dehydrogenase 2 (mitochondrial) [Source:HGNC Symbol;Acc:4456]                             |
| ENSG00000115361 | ACADL    | acyl-CoA dehydrogenase, long chain [Source:HGNC Symbol;Acc:88]                                                 |
| ENSG00000115488 | NEU2     | sialidase 2 (cytosolic sialidase) [Source:HGNC Symbol;Acc:7759]                                                |
| ENSG00000115641 | FHL2     | four and a half LIM domains 2 [Source:HGNC Symbol;Acc:3703]                                                    |

|                 |          |                                                                                                       |
|-----------------|----------|-------------------------------------------------------------------------------------------------------|
| ENSG00000115884 | SDC1     | syndecane 1 [Source:HGNC Symbol;Acc:10658]                                                            |
| ENSG00000116133 | DHCR24   | 24-dehydrocholesterol reductase [Source:HGNC Symbol;Acc:2859]                                         |
| ENSG00000116171 | SCP2     | sterol carrier protein 2 [Source:HGNC Symbol;Acc:10606]                                               |
| ENSG00000116711 | PLA2G4A  | phospholipase A2, group IVA (cytosolic, calcium-dependent) [Source:HGNC Symbol;Acc:9035]              |
| ENSG00000116906 | GNPAT    | glyceronephosphate O-acyltransferase [Source:HGNC Symbol;Acc:4416]                                    |
| ENSG00000117054 | ACADM    | acyl-CoA dehydrogenase, C-4 to C-12 straight chain [Source:HGNC Symbol;Acc:89]                        |
| ENSG00000117215 | PLA2G2D  | phospholipase A2, group IID [Source:HGNC Symbol;Acc:9033]                                             |
| ENSG00000117305 | HMGCL    | 3-hydroxymethyl-3-methylglutaryl-CoA lyase [Source:HGNC Symbol;Acc:5005]                              |
| ENSG00000117461 | PIK3R3   | phosphoinositide-3-kinase, regulatory subunit 3 (gamma) [Source:HGNC Symbol;Acc:8981]                 |
| ENSG00000117594 | HSD11B1  | hydroxysteroid (11-beta) dehydrogenase 1 [Source:HGNC Symbol;Acc:5208]                                |
| ENSG00000118137 | APOA1    | apolipoprotein A-I [Source:HGNC Symbol;Acc:600]                                                       |
| ENSG00000118402 | ELOVL4   | ELOVL fatty acid elongase 4 [Source:HGNC Symbol;Acc:14415]                                            |
| ENSG00000118523 | CTGF     | connective tissue growth factor [Source:HGNC Symbol;Acc:2500]                                         |
| ENSG00000119537 | KDSR     | 3-ketodihydroshingosine reductase [Source:HGNC Symbol;Acc:4021]                                       |
| ENSG00000119723 | COQ6     | coenzyme Q6 monooxygenase [Source:HGNC Symbol;Acc:20233]                                              |
| ENSG00000119915 | ELOVL3   | ELOVL fatty acid elongase 3 [Source:HGNC Symbol;Acc:18047]                                            |
| ENSG00000119927 | GPAM     | glycerol-3-phosphate acyltransferase, mitochondrial [Source:HGNC Symbol;Acc:24865]                    |
| ENSG00000120837 | NFYB     | nuclear transcription factor Y, beta [Source:HGNC Symbol;Acc:7805]                                    |
| ENSG00000120915 | EPHX2    | epoxide hydrolase 2, cytoplasmic [Source:HGNC Symbol;Acc:3402]                                        |
| ENSG00000121316 | PLBD1    | phospholipase B domain containing 1 [Source:HGNC Symbol;Acc:26215]                                    |
| ENSG00000121879 | PIK3CA   | phosphatidylinositol-4,5-bisphosphate 3-kinase, catalytic subunit alpha [Source:HGNC Symbol;Acc:8975] |
| ENSG00000122126 | OCRL     | oculocerebrorenal syndrome of Lowe [Source:HGNC Symbol;Acc:8108]                                      |
| ENSG00000122787 | AKR1D1   | aldo-keto reductase family 1, member D1 [Source:HGNC Symbol;Acc:388]                                  |
| ENSG00000122971 | ACADS    | acyl-CoA dehydrogenase, C-2 to C-3 short chain [Source:HGNC Symbol;Acc:90]                            |
| ENSG00000123066 | MED13L   | mediator complex subunit 13-like [Source:HGNC Symbol;Acc:22962]                                       |
| ENSG00000123684 | LPGAT1   | lysophosphatidylglycerol acyltransferase 1 [Source:HGNC Symbol;Acc:28985]                             |
| ENSG00000123689 | G0S2     | G0/G1 switch 2 [Source:HGNC Symbol;Acc:30229]                                                         |
| ENSG00000123739 | PLA2G12A | phospholipase A2, group XIIA [Source:HGNC Symbol;Acc:18554]                                           |
| ENSG00000123983 | ACSL3    | acyl-CoA synthetase long-chain family member 3 [Source:HGNC Symbol;Acc:3570]                          |
| ENSG00000124151 | NCOA3    | nuclear receptor coactivator 3 [Source:HGNC Symbol;Acc:7670]                                          |
| ENSG00000124164 | VAPB     | VAMP (vesicle-associated membrane protein)-associated protein B and C [Source:HGNC Symbol;Acc:12649]  |
| ENSG00000124212 | PTGIS    | prostaglandin I2 (prostacyclin) synthase [Source:HGNC Symbol;Acc:9603]                                |
| ENSG00000124370 | MCEE     | methylmalonyl CoA epimerase [Source:HGNC Symbol;Acc:16732]                                            |
| ENSG00000124641 | MED20    | mediator complex subunit 20 [Source:HGNC Symbol;Acc:16840]                                            |
| ENSG00000125255 | SLC10A2  | solute carrier family 10 (sodium/bile acid cotransporter), member 2 [Source:HGNC Symbol;Acc:10906]    |
| ENSG00000125505 | MBOAT7   | membrane bound O-acyltransferase domain containing 7 [Source:HGNC Symbol;Acc:15505]                   |
| ENSG00000125629 | INSIG2   | insulin induced gene 2 [Source:HGNC Symbol;Acc:20452]                                                 |
| ENSG00000125686 | MED1     | mediator complex subunit 1 [Source:HGNC Symbol;Acc:9234]                                              |
| ENSG00000125772 | GPCPD1   | glycerophosphocholine phosphodiesterase GDE1 homolog (S. cerevisiae) [Source:HGNC Symbol;Acc:26957]   |
| ENSG00000126368 | NR1D1    | nuclear receptor subfamily 1, group D, member 1 [Source:HGNC Symbol;Acc:7962]                         |
| ENSG00000126821 | SGPP1    | sphingosine-1-phosphate phosphatase 1 [Source:HGNC Symbol;Acc:17720]                                  |
| ENSG00000127472 | PLA2G5   | phospholipase A2, group V [Source:HGNC Symbol;Acc:9038]                                               |
| ENSG00000127511 | SIN3B    | SIN3 transcription regulator family member B [Source:HGNC Symbol;Acc:19354]                           |
| ENSG00000127884 | ECHS1    | enoyl CoA hydratase, short chain, 1, mitochondrial [Source:HGNC Symbol;Acc:3151]                      |
| ENSG00000128039 | SRD5A3   | steroid 5 alpha-reductase 3 [Source:HGNC Symbol;Acc:25812]                                            |
| ENSG00000128242 | GAL3ST1  | galactose-3-O-sulfotransferase 1 [Source:HGNC Symbol;Acc:24240]                                       |

|                 |         |                                                                                                                 |
|-----------------|---------|-----------------------------------------------------------------------------------------------------------------|
| ENSG00000129103 | SUMF2   | sulfatase modifying factor 2 [Source:HGNC Symbol;Acc:20415]                                                     |
| ENSG00000129219 | PLD2    | phospholipase D2 [Source:HGNC Symbol;Acc:9068]                                                                  |
| ENSG00000129353 | SLC44A2 | solute carrier family 44 (choline transporter), member 2 [Source:HGNC Symbol;Acc:17292]                         |
| ENSG00000130164 | LDLR    | low density lipoprotein receptor [Source:HGNC Symbol;Acc:6547]                                                  |
| ENSG00000130203 | APOE    | apolipoprotein E [Source:HGNC Symbol;Acc:613]                                                                   |
| ENSG00000130304 | SLC27A1 | solute carrier family 27 (fatty acid transporter), member 1 [Source:HGNC Symbol;Acc:10995]                      |
| ENSG00000130589 | HELZ2   | helicase with zinc finger 2, transcriptional coactivator [Source:HGNC Symbol;Acc:30021]                         |
| ENSG00000130772 | MED18   | mediator complex subunit 18 [Source:HGNC Symbol;Acc:25944]                                                      |
| ENSG00000130948 | HSD17B3 | hydroxysteroid (17-beta) dehydrogenase 3 [Source:HGNC Symbol;Acc:5212]                                          |
| ENSG00000131373 | HACL1   | 2-hydroxyacyl-CoA lyase 1 [Source:HGNC Symbol;Acc:17856]                                                        |
| ENSG00000131473 | ACLY    | ATP citrate lyase [Source:HGNC Symbol;Acc:115]                                                                  |
| ENSG00000131791 | PRKAB2  | protein kinase, AMP-activated, beta 2 non-catalytic subunit [Source:HGNC Symbol;Acc:9379]                       |
| ENSG00000132142 | ACACA   | acetyl-CoA carboxylase alpha [Source:HGNC Symbol;Acc:84]                                                        |
| ENSG00000132170 | PPARG   | peroxisome proliferator-activated receptor gamma [Source:HGNC Symbol;Acc:9236]                                  |
| ENSG00000132196 | HSD17B7 | hydroxysteroid (17-beta) dehydrogenase 7 [Source:HGNC Symbol;Acc:5215]                                          |
| ENSG00000132341 | RAN     | RAN, member RAS oncogene family [Source:HGNC Symbol;Acc:9846]                                                   |
| ENSG00000132376 | INPP5K  | inositol polyphosphate-5-phosphatase K [Source:HGNC Symbol;Acc:33882]                                           |
| ENSG00000132423 | COQ3    | coenzyme Q3 methyltransferase [Source:HGNC Symbol;Acc:18175]                                                    |
| ENSG00000132793 | LPIN3   | lipin 3 [Source:HGNC Symbol;Acc:14451]                                                                          |
| ENSG00000132958 | TPTE2   | transmembrane phosphoinositide 3-phosphatase and tensin homolog 2 [Source:HGNC Symbol;Acc:17299]                |
| ENSG00000132964 | CDK8    | cyclin-dependent kinase 8 [Source:HGNC Symbol;Acc:1779]                                                         |
| ENSG00000132965 | ALOX5AP | arachidonate 5-lipoxygenase-activating protein [Source:HGNC Symbol;Acc:436]                                     |
| ENSG00000133027 | PEMT    | phosphatidylethanolamine N-methyltransferase [Source:HGNC Symbol;Acc:8830]                                      |
| ENSG00000133056 | PIK3C2B | phosphatidylinositol-4-phosphate 3-kinase, catalytic subunit type 2 beta [Source:HGNC Symbol;Acc:8972]          |
| ENSG00000133275 | CSNK1G2 | casein kinase 1, gamma 2 [Source:HGNC Symbol;Acc:2455]                                                          |
| ENSG00000133398 | MED10   | mediator complex subunit 10 [Source:HGNC Symbol;Acc:28760]                                                      |
| ENSG00000133794 | ARNTL   | aryl hydrocarbon receptor nuclear translocator-like [Source:HGNC Symbol;Acc:701]                                |
| ENSG00000133835 | HSD17B4 | hydroxysteroid (17-beta) dehydrogenase 4 [Source:HGNC Symbol;Acc:5213]                                          |
| ENSG00000133997 | MED6    | mediator complex subunit 6 [Source:HGNC Symbol;Acc:19970]                                                       |
| ENSG00000134240 | HMGCS2  | 3-hydroxy-3-methylglutaryl-CoA synthase 2 (mitochondrial) [Source:HGNC Symbol;Acc:5008]                         |
| ENSG00000134255 | CEPT1   | choline/ethanolamine phosphotransferase 1 [Source:HGNC Symbol;Acc:24289]                                        |
| ENSG00000134287 | ARF3    | ADP-ribosylation factor 3 [Source:HGNC Symbol;Acc:654]                                                          |
| ENSG00000134317 | GRHL1   | grainyhead-like 1 (Drosophila) [Source:HGNC Symbol;Acc:17923]                                                   |
| ENSG00000134324 | LPIN1   | lipin 1 [Source:HGNC Symbol;Acc:13345]                                                                          |
| ENSG00000134538 | SLCO1B1 | solute carrier organic anion transporter family, member 1B1 [Source:HGNC Symbol;Acc:10959]                      |
| ENSG00000134716 | CYP2J2  | cytochrome P450, family 2, subfamily J, polypeptide 2 [Source:HGNC Symbol;Acc:2634]                             |
| ENSG00000134824 | FADS2   | fatty acid desaturase 2 [Source:HGNC Symbol;Acc:3575]                                                           |
| ENSG00000134852 | CLOCK   | clock circadian regulator [Source:HGNC Symbol;Acc:2082]                                                         |
| ENSG00000135218 | CD36    | CD36 molecule (thrombospondin receptor) [Source:HGNC Symbol;Acc:1663]                                           |
| ENSG00000135241 | PNPLA8  | patatin-like phospholipase domain containing 8 [Source:HGNC Symbol;Acc:28900]                                   |
| ENSG00000135346 | CGA     | glycoprotein hormones, alpha polypeptide [Source:HGNC Symbol;Acc:1885]                                          |
| ENSG00000135587 | SMPD2   | sphingomyelin phosphodiesterase 2, neutral membrane (neutral sphingomyelinase) [Source:HGNC Symbol;Acc:11121]   |
| ENSG00000135744 | AGT     | angiotensinogen (serpin peptidase inhibitor, clade A, member 8) [Source:HGNC Symbol;Acc:333]                    |
| ENSG00000135929 | CYP27A1 | cytochrome P450, family 27, subfamily A, polypeptide 1 [Source:HGNC Symbol;Acc:2605]                            |
| ENSG00000136146 | MED4    | mediator complex subunit 4 [Source:HGNC Symbol;Acc:17903]                                                       |
| ENSG00000136699 | SMPD4   | sphingomyelin phosphodiesterase 4, neutral membrane (neutral sphingomyelinase-3) [Source:HGNC Symbol;Acc:32949] |

|                 |         |                                                                                                                                               |
|-----------------|---------|-----------------------------------------------------------------------------------------------------------------------------------------------|
| ENSG00000136881 | BAAT    | bile acid CoA: amino acid N-acyltransferase (glycine N-choloyltransferase) [Source:HGNC Symbol;Acc:932]                                       |
| ENSG00000137392 | CLPS    | colipase, pancreatic [Source:HGNC Symbol;Acc:2085]                                                                                            |
| ENSG00000137574 | TGS1    | trimethylguanosine synthase 1 [Source:HGNC Symbol;Acc:17843]                                                                                  |
| ENSG00000137693 | YAP1    | Yes-associated protein 1 [Source:HGNC Symbol;Acc:16262]                                                                                       |
| ENSG00000137869 | CYP19A1 | cytochrome P450, family 19, subfamily A, polypeptide 1 [Source:HGNC Symbol;Acc:2594]                                                          |
| ENSG00000137968 | SLC44A5 | solute carrier family 44, member 5 [Source:HGNC Symbol;Acc:28524]                                                                             |
| ENSG00000138018 | EPT1    | ethanolaminephosphotransferase 1 (CDP-ethanolamine-specific) [Source:HGNC Symbol;Acc:29361]                                                   |
| ENSG00000138029 | HADHB   | hydroxyacyl-CoA dehydrogenase/3-ketoacyl-CoA thiolase/enoyl-CoA hydratase (trifunctional protein), beta subunit [Source:HGNC Symbol;Acc:4803] |
| ENSG00000138061 | CYP1B1  | cytochrome P450, family 1, subfamily B, polypeptide 1 [Source:HGNC Symbol;Acc:2597]                                                           |
| ENSG00000138075 | ABCG5   | ATP-binding cassette, sub-family G (WHITE), member 5 [Source:HGNC Symbol;Acc:13886]                                                           |
| ENSG00000138109 | CYP2C9  | cytochrome P450, family 2, subfamily C, polypeptide 9 [Source:HGNC Symbol;Acc:2623]                                                           |
| ENSG00000138115 | CYP2C8  | cytochrome P450, family 2, subfamily C, polypeptide 8 [Source:HGNC Symbol;Acc:2622]                                                           |
| ENSG00000138135 | CH25H   | cholesterol 25-hydroxylase [Source:HGNC Symbol;Acc:1907]                                                                                      |
| ENSG00000138413 | IDH1    | isocitrate dehydrogenase 1 (NADP+), soluble [Source:HGNC Symbol;Acc:5382]                                                                     |
| ENSG00000138678 | AGPAT9  | 1-acylglycerol-3-phosphate O-acyltransferase 9 [Source:HGNC Symbol;Acc:28157]                                                                 |
| ENSG00000138796 | HADH    | hydroxyacyl-CoA dehydrogenase [Source:HGNC Symbol;Acc:4799]                                                                                   |
| ENSG00000138802 | SEC24B  | SEC24 family member B [Source:HGNC Symbol;Acc:10704]                                                                                          |
| ENSG00000138823 | MTTP    | microsomal triglyceride transfer protein [Source:HGNC Symbol;Acc:7467]                                                                        |
| ENSG00000139144 | PIK3C2G | phosphatidylinositol-4-phosphate 3-kinase, catalytic subunit type 2 gamma [Source:HGNC Symbol;Acc:8973]                                       |
| ENSG00000139163 | ETNK1   | ethanolamine kinase 1 [Source:HGNC Symbol;Acc:24649]                                                                                          |
| ENSG00000139278 | GLIPR1  | GLI pathogenesis-related 1 [Source:HGNC Symbol;Acc:17001]                                                                                     |
| ENSG00000139505 | MTMR6   | myotubularin related protein 6 [Source:HGNC Symbol;Acc:7453]                                                                                  |
| ENSG00000139624 | CERS5   | ceramide synthase 5 [Source:HGNC Symbol;Acc:23749]                                                                                            |
| ENSG00000140284 | SLC27A2 | solute carrier family 27 (fatty acid transporter), member 2 [Source:HGNC Symbol;Acc:10996]                                                    |
| ENSG00000140396 | NCOA2   | nuclear receptor coactivator 2 [Source:HGNC Symbol;Acc:7669]                                                                                  |
| ENSG00000140459 | CYP11A1 | cytochrome P450, family 11, subfamily A, polypeptide 1 [Source:HGNC Symbol;Acc:2590]                                                          |
| ENSG00000140465 | CYP1A1  | cytochrome P450, family 1, subfamily A, polypeptide 1 [Source:HGNC Symbol;Acc:2595]                                                           |
| ENSG00000140505 | CYP1A2  | cytochrome P450, family 1, subfamily A, polypeptide 2 [Source:HGNC Symbol;Acc:2596]                                                           |
| ENSG00000140943 | MBTPS1  | membrane-bound transcription factor peptidase, site 1 [Source:HGNC Symbol;Acc:15456]                                                          |
| ENSG00000141026 | MED9    | mediator complex subunit 9 [Source:HGNC Symbol;Acc:25487]                                                                                     |
| ENSG00000141027 | NCOR1   | nuclear receptor corepressor 1 [Source:HGNC Symbol;Acc:7672]                                                                                  |
| ENSG00000141337 | ARSG    | arylsulfatase G [Source:HGNC Symbol;Acc:24102]                                                                                                |
| ENSG00000141506 | PIK3R5  | phosphoinositide-3-kinase, regulatory subunit 5 [Source:HGNC Symbol;Acc:30035]                                                                |
| ENSG00000141720 | PIP4K2B | phosphatidylinositol-5-phosphate 4-kinase, type II, beta [Source:HGNC Symbol;Acc:8998]                                                        |
| ENSG00000141934 | PPAP2C  | phosphatidic acid phosphatase type 2C [Source:HGNC Symbol;Acc:9230]                                                                           |
| ENSG00000142453 | CARM1   | coactivator-associated arginine methyltransferase 1 [Source:HGNC Symbol;Acc:23393]                                                            |
| ENSG00000142798 | HSPG2   | heparan sulfate proteoglycan 2 [Source:HGNC Symbol;Acc:5273]                                                                                  |
| ENSG00000142875 | PRKACB  | protein kinase, cAMP-dependent, catalytic, beta [Source:HGNC Symbol;Acc:9381]                                                                 |
| ENSG00000142973 | CYP4B1  | cytochrome P450, family 4, subfamily B, polypeptide 1 [Source:HGNC Symbol;Acc:2644]                                                           |
| ENSG00000143036 | SLC44A3 | solute carrier family 44, member 3 [Source:HGNC Symbol;Acc:28689]                                                                             |
| ENSG00000143344 | RGL1    | ral guanine nucleotide dissociation stimulator-like 1 [Source:HGNC Symbol;Acc:30281]                                                          |
| ENSG00000143393 | PI4KB   | phosphatidylinositol 4-kinase, catalytic, beta [Source:HGNC Symbol;Acc:8984]                                                                  |
| ENSG00000143398 | PIP5K1A | phosphatidylinositol-4-phosphate 5-kinase, type I, alpha [Source:HGNC Symbol;Acc:8994]                                                        |
| ENSG00000143418 | CERS2   | ceramide synthase 2 [Source:HGNC Symbol;Acc:14076]                                                                                            |
| ENSG00000143753 | DEGS1   | delta(4)-desaturase, sphingolipid 1 [Source:HGNC Symbol;Acc:13709]                                                                            |
| ENSG00000143761 | ARF1    | ADP-ribosylation factor 1 [Source:HGNC Symbol;Acc:652]                                                                                        |

|                 |          |                                                                                                                                     |
|-----------------|----------|-------------------------------------------------------------------------------------------------------------------------------------|
| ENSG00000143797 | MBOAT2   | membrane bound O-acyltransferase domain containing 2 [Source:HGNC Symbol;Acc:25193]                                                 |
| ENSG00000143815 | LBR      | lamin B receptor [Source:HGNC Symbol;Acc:6518]                                                                                      |
| ENSG00000143845 | ETNK2    | ethanolamine kinase 2 [Source:HGNC Symbol;Acc:25575]                                                                                |
| ENSG00000143921 | ABCG8    | ATP-binding cassette, sub-family G (WHITE), member 8 [Source:HGNC Symbol;Acc:13887]                                                 |
| ENSG00000144455 | SUMF1    | sulfatase modifying factor 1 [Source:HGNC Symbol;Acc:20376]                                                                         |
| ENSG00000145283 | SLC10A6  | solute carrier family 10 (sodium/bile acid cotransporter), member 6 [Source:HGNC Symbol;Acc:30603]                                  |
| ENSG00000145321 | GC       | group-specific component (vitamin D binding protein) [Source:HGNC Symbol;Acc:4187]                                                  |
| ENSG00000145545 | SRD5A1   | steroid-5-alpha-reductase, alpha polypeptide 1 (3-oxo-5 alpha-steroid delta 4-dehydrogenase alpha 1) [Source:HGNC Symbol;Acc:11284] |
| ENSG00000145675 | PIK3R1   | phosphoinositide-3-kinase, regulatory subunit 1 (alpha) [Source:HGNC Symbol;Acc:8979]                                               |
| ENSG00000146072 | TNFRSF21 | tumor necrosis factor receptor superfamily, member 21 [Source:HGNC Symbol;Acc:13469]                                                |
| ENSG00000146085 | MUT      | methylmalonyl CoA mutase [Source:HGNC Symbol;Acc:7526]                                                                              |
| ENSG00000146233 | CYP39A1  | cytochrome P450, family 39, subfamily A, polypeptide 1 [Source:HGNC Symbol;Acc:17449]                                               |
| ENSG00000146426 | TIAM2    | T-cell lymphoma invasion and metastasis 2 [Source:HGNC Symbol;Acc:11806]                                                            |
| ENSG00000147155 | EBP      | emopamil binding protein (sterol isomerase) [Source:HGNC Symbol;Acc:3133]                                                           |
| ENSG00000147383 | NSDHL    | NAD(P) dependent steroid dehydrogenase-like [Source:HGNC Symbol;Acc:13398]                                                          |
| ENSG00000147465 | STAR     | steroidogenic acute regulatory protein [Source:HGNC Symbol;Acc:11359]                                                               |
| ENSG00000147872 | PLIN2    | perilipin 2 [Source:HGNC Symbol;Acc:248]                                                                                            |
| ENSG00000148154 | UGCG     | UDP-glucose ceramide glucosyltransferase [Source:HGNC Symbol;Acc:12524]                                                             |
| ENSG00000148297 | MED22    | mediator complex subunit 22 [Source:HGNC Symbol;Acc:11477]                                                                          |
| ENSG00000148344 | PTGES    | prostaglandin E synthase [Source:HGNC Symbol;Acc:9599]                                                                              |
| ENSG00000148377 | IDI2     | isopentenyl-diphosphate delta isomerase 2 [Source:HGNC Symbol;Acc:23487]                                                            |
| ENSG00000148384 | INPP5E   | inositol polyphosphate-5-phosphatase, 72 kDa [Source:HGNC Symbol;Acc:21474]                                                         |
| ENSG00000148459 | PDSS1    | prenyl (decaprenyl) diphosphate synthase, subunit 1 [Source:HGNC Symbol;Acc:17759]                                                  |
| ENSG00000148677 | ANKRD1   | ankyrin repeat domain 1 (cardiac muscle) [Source:HGNC Symbol;Acc:15819]                                                             |
| ENSG00000148795 | CYP17A1  | cytochrome P450, family 17, subfamily A, polypeptide 1 [Source:HGNC Symbol;Acc:2593]                                                |
| ENSG00000149084 | HSD17B12 | hydroxysteroid (17-beta) dehydrogenase 12 [Source:HGNC Symbol;Acc:18646]                                                            |
| ENSG00000149485 | FADS1    | fatty acid desaturase 1 [Source:HGNC Symbol;Acc:3574]                                                                               |
| ENSG00000149809 | TM7SF2   | transmembrane 7 superfamily member 2 [Source:HGNC Symbol;Acc:11863]                                                                 |
| ENSG00000150867 | PIP4K2A  | phosphatidylinositol-5-phosphate 4-kinase, type II, alpha [Source:HGNC Symbol;Acc:8997]                                             |
| ENSG00000150961 | SEC24D   | SEC24 family member D [Source:HGNC Symbol;Acc:10706]                                                                                |
| ENSG00000151611 | MMAA     | methylmalonic aciduria (cobalamin deficiency) cblA type [Source:HGNC Symbol;Acc:18871]                                              |
| ENSG00000151632 | AKR1C2   | aldo-keto reductase family 1, member C2 [Source:HGNC Symbol;Acc:385]                                                                |
| ENSG00000151726 | ACSL1    | acyl-CoA synthetase long-chain family member 1 [Source:HGNC Symbol;Acc:3569]                                                        |
| ENSG00000152642 | GPD1L    | glycerol-3-phosphate dehydrogenase 1-like [Source:HGNC Symbol;Acc:28956]                                                            |
| ENSG00000152700 | SAR1B    | SAR1 homolog B (S. cerevisiae) [Source:HGNC Symbol;Acc:10535]                                                                       |
| ENSG00000152904 | GGPS1    | geranylgeranyl diphosphate synthase 1 [Source:HGNC Symbol;Acc:4249]                                                                 |
| ENSG00000152944 | MED21    | mediator complex subunit 21 [Source:HGNC Symbol;Acc:11473]                                                                          |
| ENSG00000153395 | LPCAT1   | lysophosphatidylcholine acyltransferase 1 [Source:HGNC Symbol;Acc:25718]                                                            |
| ENSG00000154227 | CERS3    | ceramide synthase 3 [Source:HGNC Symbol;Acc:23752]                                                                                  |
| ENSG00000155016 | CYP2U1   | cytochrome P450, family 2, subfamily U, polypeptide 1 [Source:HGNC Symbol;Acc:20582]                                                |
| ENSG00000155111 | CDK19    | cyclin-dependent kinase 19 [Source:HGNC Symbol;Acc:19338]                                                                           |
| ENSG00000155189 | AGPAT5   | 1-acylglycerol-3-phosphate O-acyltransferase 5 [Source:HGNC Symbol;Acc:20886]                                                       |
| ENSG00000155252 | PI4K2A   | phosphatidylinositol 4-kinase type 2 alpha [Source:HGNC Symbol;Acc:30031]                                                           |
| ENSG00000155846 | PPARGC1B | peroxisome proliferator-activated receptor gamma, coactivator 1 beta [Source:HGNC Symbol;Acc:30022]                                 |
| ENSG00000155868 | MED7     | mediator complex subunit 7 [Source:HGNC Symbol;Acc:2378]                                                                            |
| ENSG00000156471 | PTDSS1   | phosphatidylserine synthase 1 [Source:HGNC Symbol;Acc:9587]                                                                         |

|                 |          |                                                                                                      |
|-----------------|----------|------------------------------------------------------------------------------------------------------|
| ENSG00000156603 | MED19    | mediator complex subunit 19 [Source:HGNC Symbol;Acc:29600]                                           |
| ENSG00000157184 | CPT2     | carnitine palmitoyltransferase 2 [Source:HGNC Symbol;Acc:2330]                                       |
| ENSG00000157399 | ARSE     | arylsulfatase E (chondrodysplasia punctata 1) [Source:HGNC Symbol;Acc:719]                           |
| ENSG00000157870 | FAM213B  | family with sequence similarity 213, member B [Source:HGNC Symbol;Acc:28390]                         |
| ENSG00000157978 | LDLRAP1  | low density lipoprotein receptor adaptor protein 1 [Source:HGNC Symbol;Acc:18640]                    |
| ENSG00000158669 | AGPAT6   | 1-acylglycerol-3-phosphate O-acyltransferase 6 [Source:HGNC Symbol;Acc:20880]                        |
| ENSG00000158786 | PLA2G2F  | phospholipase A2, group IIF [Source:HGNC Symbol;Acc:30040]                                           |
| ENSG00000158874 | APOA2    | apolipoprotein A-II [Source:HGNC Symbol;Acc:601]                                                     |
| ENSG00000159082 | SYNJ1    | synaptojanin 1 [Source:HGNC Symbol;Acc:11503]                                                        |
| ENSG00000159228 | CBR1     | carbonyl reductase 1 [Source:HGNC Symbol;Acc:1548]                                                   |
| ENSG00000159337 | PLA2G4D  | phospholipase A2, group IVD (cytosolic) [Source:HGNC Symbol;Acc:30038]                               |
| ENSG00000159479 | MED8     | mediator complex subunit 8 [Source:HGNC Symbol;Acc:19971]                                            |
| ENSG00000160179 | ABCG1    | ATP-binding cassette, sub-family G (WHITE), member 1 [Source:HGNC Symbol;Acc:73]                     |
| ENSG00000160216 | AGPAT3   | 1-acylglycerol-3-phosphate O-acyltransferase 3 [Source:HGNC Symbol;Acc:326]                          |
| ENSG00000160285 | LSS      | lanosterol synthase (2,3-oxidosqualene-lanosterol cyclase) [Source:HGNC Symbol;Acc:6708]             |
| ENSG00000160563 | MED27    | mediator complex subunit 27 [Source:HGNC Symbol;Acc:2377]                                            |
| ENSG00000160752 | FDPS     | farnesyl diphosphate synthase [Source:HGNC Symbol;Acc:3631]                                          |
| ENSG00000160882 | CYP11B1  | cytochrome P450, family 11, subfamily B, polypeptide 1 [Source:HGNC Symbol;Acc:2591]                 |
| ENSG00000161217 | PCYT1A   | phosphate cytidylyltransferase 1, choline, alpha [Source:HGNC Symbol;Acc:8754]                       |
| ENSG00000161267 | BDH1     | 3-hydroxybutyrate dehydrogenase, type 1 [Source:HGNC Symbol;Acc:1027]                                |
| ENSG00000161533 | ACOX1    | acyl-CoA oxidase 1, palmitoyl [Source:HGNC Symbol;Acc:119]                                           |
| ENSG00000161905 | ALOX15   | arachidonate 15-lipoxygenase [Source:HGNC Symbol;Acc:433]                                            |
| ENSG00000161920 | MED11    | mediator complex subunit 11 [Source:HGNC Symbol;Acc:32687]                                           |
| ENSG00000162139 | NEU3     | sialidase 3 (membrane sialidase) [Source:HGNC Symbol;Acc:7760]                                       |
| ENSG00000162365 | CYP4A22  | cytochrome P450, family 4, subfamily A, polypeptide 22 [Source:HGNC Symbol;Acc:20575]                |
| ENSG00000162407 | PPAP2B   | phosphatidic acid phosphatase type 2B [Source:HGNC Symbol;Acc:9229]                                  |
| ENSG00000162409 | PRKAA2   | protein kinase, AMP-activated, alpha 2 catalytic subunit [Source:HGNC Symbol;Acc:9377]               |
| ENSG00000162889 | MAPKAPK2 | mitogen-activated protein kinase-activated protein kinase 2 [Source:HGNC Symbol;Acc:6887]            |
| ENSG00000163082 | SGPP2    | sphingosine-1-phosphate phosphatase 2 [Source:HGNC Symbol;Acc:19953]                                 |
| ENSG00000163106 | HPGDS    | hematopoietic prostaglandin D synthase [Source:HGNC Symbol;Acc:17890]                                |
| ENSG00000163344 | PMVK     | phosphomevalonate kinase [Source:HGNC Symbol;Acc:9141]                                               |
| ENSG00000163521 | GLB1L    | galactosidase, beta 1-like [Source:HGNC Symbol;Acc:28129]                                            |
| ENSG00000163586 | FABP1    | fatty acid binding protein 1, liver [Source:HGNC Symbol;Acc:3555]                                    |
| ENSG00000163590 | PPM1L    | protein phosphatase, Mg <sup>2+</sup> /Mn <sup>2+</sup> dependent, 1L [Source:HGNC Symbol;Acc:16381] |
| ENSG00000163624 | CDS1     | CDP-diacylglycerol synthase (phosphatidate cytidylyltransferase) 1 [Source:HGNC Symbol;Acc:1800]     |
| ENSG00000163631 | ALB      | albumin [Source:HGNC Symbol;Acc:399]                                                                 |
| ENSG00000163719 | MTMR14   | myotubularin related protein 14 [Source:HGNC Symbol;Acc:26190]                                       |
| ENSG00000163803 | PLB1     | phospholipase B1 [Source:HGNC Symbol;Acc:30041]                                                      |
| ENSG00000164023 | SGMS2    | sphingomyelin synthase 2 [Source:HGNC Symbol;Acc:28395]                                              |
| ENSG00000164120 | HPGD     | hydroxyprostaglandin dehydrogenase 15-(NAD) [Source:HGNC Symbol;Acc:5154]                            |
| ENSG00000164181 | ELOVL7   | ELOVL fatty acid elongase 7 [Source:HGNC Symbol;Acc:26292]                                           |
| ENSG00000164211 | STARD4   | StAR-related lipid transfer (START) domain containing 4 [Source:HGNC Symbol;Acc:18058]               |
| ENSG00000164291 | ARSK     | arylsulfatase family, member K [Source:HGNC Symbol;Acc:25239]                                        |
| ENSG00000164398 | ACSL6    | acyl-CoA synthetase long-chain family member 6 [Source:HGNC Symbol;Acc:16496]                        |
| ENSG00000164494 | PDSS2    | prenyl (decaprenyl) diphosphate synthase, subunit 2 [Source:HGNC Symbol;Acc:23041]                   |
| ENSG00000164758 | MED30    | mediator complex subunit 30 [Source:HGNC Symbol;Acc:23032]                                           |



|                 |         |                                                                                                       |
|-----------------|---------|-------------------------------------------------------------------------------------------------------|
| ENSG00000165029 | ABCA1   | ATP-binding cassette, sub-family A (ABC1), member 1 [Source:HGNC Symbol;Acc:29]                       |
| ENSG00000165059 | PRKACG  | protein kinase, cAMP-dependent, catalytic, gamma [Source:HGNC Symbol;Acc:9382]                        |
| ENSG00000165458 | INPPL1  | inositol polyphosphate phosphatase-like 1 [Source:HGNC Symbol;Acc:6080]                               |
| ENSG00000165841 | CYP2C19 | cytochrome P450, family 2, subfamily C, polypeptide 19 [Source:HGNC Symbol;Acc:2621]                  |
| ENSG00000166035 | LIPC    | lipase, hepatic [Source:HGNC Symbol;Acc:6619]                                                         |
| ENSG00000166126 | AMN     | amnion associated transmembrane protein [Source:HGNC Symbol;Acc:14604]                                |
| ENSG00000166157 | TPTE    | transmembrane phosphatase with tensin homology [Source:HGNC Symbol;Acc:12023]                         |
| ENSG00000166224 | SGPL1   | sphingosine-1-phosphate lyase 1 [Source:HGNC Symbol;Acc:10817]                                        |
| ENSG00000166311 | SMPD1   | sphingomyelin phosphodiesterase 1, acid lysosomal [Source:HGNC Symbol;Acc:11120]                      |
| ENSG00000166428 | PLD4    | phospholipase D family, member 4 [Source:HGNC Symbol;Acc:23792]                                       |
| ENSG00000166819 | PLIN1   | perilipin 1 [Source:HGNC Symbol;Acc:9076]                                                             |
| ENSG00000166821 | PEX11A  | peroxisomal biogenesis factor 11 alpha [Source:HGNC Symbol;Acc:8852]                                  |
| ENSG00000167186 | COQ7    | coenzyme Q7 homolog, ubiquinone (yeast) [Source:HGNC Symbol;Acc:2244]                                 |
| ENSG00000167261 | DPEP2   | dipeptidase 2 [Source:HGNC Symbol;Acc:23028]                                                          |
| ENSG00000167468 | GPX4    | glutathione peroxidase 4 [Source:HGNC Symbol;Acc:4556]                                                |
| ENSG00000167508 | MVD     | mevalonate (diphospho) decarboxylase [Source:HGNC Symbol;Acc:7529]                                    |
| ENSG00000167588 | GPD1    | glycerol-3-phosphate dehydrogenase 1 (soluble) [Source:HGNC Symbol;Acc:4455]                          |
| ENSG00000167769 | ACER1   | alkaline ceramidase 1 [Source:HGNC Symbol;Acc:18356]                                                  |
| ENSG00000167772 | ANGPTL4 | angiopoietin-like 4 [Source:HGNC Symbol;Acc:16039]                                                    |
| ENSG00000167910 | CYP7A1  | cytochrome P450, family 7, subfamily A, polypeptide 1 [Source:HGNC Symbol;Acc:2651]                   |
| ENSG00000167969 | EC11    | enoyl-CoA delta isomerase 1 [Source:HGNC Symbol;Acc:2703]                                             |
| ENSG00000168306 | ACOX2   | acyl-CoA oxidase 2, branched chain [Source:HGNC Symbol;Acc:120]                                       |
| ENSG00000168350 | DEGS2   | delta(4)-desaturase, sphingolipid 2 [Source:HGNC Symbol;Acc:20113]                                    |
| ENSG00000168487 | BMP1    | bone morphogenetic protein 1 [Source:HGNC Symbol;Acc:1067]                                            |
| ENSG00000168907 | PLA2G4F | phospholipase A2, group IVF [Source:HGNC Symbol;Acc:27396]                                            |
| ENSG00000168918 | INPP5D  | inositol polyphosphate-5-phosphatase, 145kDa [Source:HGNC Symbol;Acc:6079]                            |
| ENSG00000169375 | SIN3A   | SIN3 transcription regulator family member A [Source:HGNC Symbol;Acc:19353]                           |
| ENSG00000169692 | AGPAT2  | 1-acylglycerol-3-phosphate O-acyltransferase 2 [Source:HGNC Symbol;Acc:325]                           |
| ENSG00000169710 | FASN    | fatty acid synthase [Source:HGNC Symbol;Acc:3594]                                                     |
| ENSG00000170231 | FABP6   | fatty acid binding protein 6, ileal [Source:HGNC Symbol;Acc:3561]                                     |
| ENSG00000170266 | GLB1    | galactosidase, beta 1 [Source:HGNC Symbol;Acc:4298]                                                   |
| ENSG00000170323 | FABP4   | fatty acid binding protein 4, adipocyte [Source:HGNC Symbol;Acc:3559]                                 |
| ENSG00000170485 | NPAS2   | neuronal PAS domain protein 2 [Source:HGNC Symbol;Acc:7895]                                           |
| ENSG00000170522 | ELOVL6  | ELOVL fatty acid elongase 6 [Source:HGNC Symbol;Acc:15829]                                            |
| ENSG00000170835 | CEL     | carboxyl ester lipase [Source:HGNC Symbol;Acc:1848]                                                   |
| ENSG00000170890 | PLA2G1B | phospholipase A2, group IB (pancreas) [Source:HGNC Symbol;Acc:9030]                                   |
| ENSG00000171100 | MTM1    | myotubularin 1 [Source:HGNC Symbol;Acc:7448]                                                          |
| ENSG00000171608 | PIK3CD  | phosphatidylinositol-4,5-bisphosphate 3-kinase, catalytic subunit delta [Source:HGNC Symbol;Acc:8977] |
| ENSG00000171720 | HDAC3   | histone deacetylase 3 [Source:HGNC Symbol;Acc:4854]                                                   |
| ENSG00000171862 | PTEN    | phosphatase and tensin homolog [Source:HGNC Symbol;Acc:9588]                                          |
| ENSG00000171903 | CYP4F11 | cytochrome P450, family 4, subfamily F, polypeptide 11 [Source:HGNC Symbol;Acc:13265]                 |
| ENSG00000171954 | CYP4F22 | cytochrome P450, family 4, subfamily F, polypeptide 22 [Source:HGNC Symbol;Acc:26820]                 |
| ENSG00000172197 | MBOAT1  | membrane bound O-acyltransferase domain containing 1 [Source:HGNC Symbol;Acc:21579]                   |
| ENSG00000172292 | CERS6   | ceramide synthase 6 [Source:HGNC Symbol;Acc:23826]                                                    |
| ENSG00000172296 | SPTLC3  | serine palmitoyltransferase, long chain base subunit 3 [Source:HGNC Symbol;Acc:16253]                 |
| ENSG00000172345 | STARD5  | StAR-related lipid transfer (START) domain containing 5 [Source:HGNC Symbol;Acc:18065]                |

|                 |          |                                                                                                         |
|-----------------|----------|---------------------------------------------------------------------------------------------------------|
| ENSG00000172531 | PPP1CA   | protein phosphatase 1, catalytic subunit, alpha isozyme [Source:HGNC Symbol;Acc:9281]                   |
| ENSG00000172817 | CYP7B1   | cytochrome P450, family 7, subfamily B, polypeptide 1 [Source:HGNC Symbol;Acc:2652]                     |
| ENSG00000172893 | DHCR7    | 7-dehydrocholesterol reductase [Source:HGNC Symbol;Acc:2860]                                            |
| ENSG00000172954 | LCLAT1   | lysocardiolipin acyltransferase 1 [Source:HGNC Symbol;Acc:26756]                                        |
| ENSG00000173085 | COQ2     | coenzyme Q2 4-hydroxybenzoate polyprenyltransferase [Source:HGNC Symbol;Acc:25223]                      |
| ENSG00000173153 | ESRRA    | estrogen-related receptor alpha [Source:HGNC Symbol;Acc:3471]                                           |
| ENSG00000173868 | PHOSPHO1 | phosphatase, orphan 1 [Source:HGNC Symbol;Acc:16815]                                                    |
| ENSG00000174083 | PIK3R6   | phosphoinositide-3-kinase, regulatory subunit 6 [Source:HGNC Symbol;Acc:27101]                          |
| ENSG00000174448 | STARDB6  | StAR-related lipid transfer (START) domain containing 6 [Source:HGNC Symbol;Acc:18066]                  |
| ENSG00000174915 | PTDSS2   | phosphatidylserine synthase 2 [Source:HGNC Symbol;Acc:15463]                                            |
| ENSG00000175198 | PCCA     | propionyl CoA carboxylase, alpha polypeptide [Source:HGNC Symbol;Acc:8653]                              |
| ENSG00000175221 | MED16    | mediator complex subunit 16 [Source:HGNC Symbol;Acc:17556]                                              |
| ENSG00000175336 | APOF     | apolipoprotein F [Source:HGNC Symbol;Acc:615]                                                           |
| ENSG00000175445 | LPL      | lipoprotein lipase [Source:HGNC Symbol;Acc:6677]                                                        |
| ENSG00000175535 | PNLIP    | pancreatic lipase [Source:HGNC Symbol;Acc:9155]                                                         |
| ENSG00000175899 | A2M      | alpha-2-macroglobulin [Source:HGNC Symbol;Acc:7]                                                        |
| ENSG00000176153 | GPX2     | glutathione peroxidase 2 (gastrointestinal) [Source:HGNC Symbol;Acc:4554]                               |
| ENSG00000176170 | SPHK1    | sphingosine kinase 1 [Source:HGNC Symbol;Acc:11240]                                                     |
| ENSG00000176454 | LPCAT4   | lysophosphatidylcholine acyltransferase 4 [Source:HGNC Symbol;Acc:30059]                                |
| ENSG00000176485 | PLA2G16  | phospholipase A2, group XVI [Source:HGNC Symbol;Acc:17825]                                              |
| ENSG00000176986 | SEC24C   | SEC24 family member C [Source:HGNC Symbol;Acc:10705]                                                    |
| ENSG00000177076 | ACER2    | alkaline ceramidase 2 [Source:HGNC Symbol;Acc:23675]                                                    |
| ENSG00000177200 | CHD9     | chromodomain helicase DNA binding protein 9 [Source:HGNC Symbol;Acc:25701]                              |
| ENSG00000177565 | TBL1XR1  | transducin (beta)-like 1 X-linked receptor 1 [Source:HGNC Symbol;Acc:29529]                             |
| ENSG00000177628 | GBA      | glucosidase, beta, acid [Source:HGNC Symbol;Acc:4177]                                                   |
| ENSG00000177666 | PNPLA2   | patatin-like phospholipase domain containing 2 [Source:HGNC Symbol;Acc:30802]                           |
| ENSG00000178537 | SLC25A20 | solute carrier family 25 (carnitine/acylcarnitine translocase), member 20 [Source:HGNC Symbol;Acc:1421] |
| ENSG00000179142 | CYP11B2  | cytochrome P450, family 11, subfamily B, polypeptide 2 [Source:HGNC Symbol;Acc:2592]                    |
| ENSG00000179477 | ALOX12B  | arachidonate 12-lipoxygenase, 12R type [Source:HGNC Symbol;Acc:430]                                     |
| ENSG00000179593 | ALOX15B  | arachidonate 15-lipoxygenase, type B [Source:HGNC Symbol;Acc:434]                                       |
| ENSG00000179598 | PLD6     | phospholipase D family, member 6 [Source:HGNC Symbol;Acc:30447]                                         |
| ENSG00000180182 | MED14    | mediator complex subunit 14 [Source:HGNC Symbol;Acc:2370]                                               |
| ENSG00000180432 | CYP8B1   | cytochrome P450, family 8, subfamily B, polypeptide 1 [Source:HGNC Symbol;Acc:2653]                     |
| ENSG00000180801 | ARSJ     | arylsulfatase family, member J [Source:HGNC Symbol;Acc:26286]                                           |
| ENSG00000180957 | PITPNB   | phosphatidylinositol transfer protein, beta [Source:HGNC Symbol;Acc:9002]                               |
| ENSG00000182156 | ENPP7    | ectonucleotide pyrophosphatase/phosphodiesterase 7 [Source:HGNC Symbol;Acc:23764]                       |
| ENSG00000183876 | ARSI     | arylsulfatase family, member I [Source:HGNC Symbol;Acc:32521]                                           |
| ENSG00000184304 | PRKD1    | protein kinase D1 [Source:HGNC Symbol;Acc:9407]                                                         |
| ENSG00000184381 | PLA2G6   | phospholipase A2, group VI (cytosolic, calcium-independent) [Source:HGNC Symbol;Acc:9039]               |
| ENSG00000184494 | NEU1     | sialidase 1 (lysosomal sialidase) [Source:HGNC Symbol;Acc:7758]                                         |
| ENSG00000184634 | MED12    | mediator complex subunit 12 [Source:HGNC Symbol;Acc:11957]                                              |
| ENSG00000185000 | DGAT1    | diacylglycerol O-acyltransferase 1 [Source:HGNC Symbol;Acc:2843]                                        |
| ENSG00000185133 | INPP5J   | inositol polyphosphate-5-phosphatase J [Source:HGNC Symbol;Acc:8956]                                    |
| ENSG00000185591 | SP1      | Sp1 transcription factor [Source:HGNC Symbol;Acc:11205]                                                 |
| ENSG00000185624 | P4HB     | prolyl 4-hydroxylase, beta polypeptide [Source:HGNC Symbol;Acc:8548]                                    |
| ENSG00000185813 | PCYT2    | phosphate cytidylyltransferase 2, ethanolamine [Source:HGNC Symbol;Acc:8756]                            |

|                 |          |                                                                                                            |
|-----------------|----------|------------------------------------------------------------------------------------------------------------|
| ENSG00000186104 | CYP2R1   | cytochrome P450, family 2, subfamily R, polypeptide 1 [Source:HGNC Symbol;Acc:20580]                       |
| ENSG00000186111 | PIP5K1C  | phosphatidylinositol-4-phosphate 5-kinase, type I, gamma [Source:HGNC Symbol;Acc:8996]                     |
| ENSG00000186115 | CYP4F2   | cytochrome P450, family 4, subfamily F, polypeptide 2 [Source:HGNC Symbol;Acc:2645]                        |
| ENSG00000186281 | GPAT2    | glycerol-3-phosphate acyltransferase 2, mitochondrial [Source:HGNC Symbol;Acc:27168]                       |
| ENSG00000186298 | PPP1CC   | protein phosphatase 1, catalytic subunit, gamma isozyme [Source:HGNC Symbol;Acc:9283]                      |
| ENSG00000186350 | RXRA     | retinoid X receptor, alpha [Source:HGNC Symbol;Acc:10477]                                                  |
| ENSG00000186480 | INSIG1   | insulin induced gene 1 [Source:HGNC Symbol;Acc:6083]                                                       |
| ENSG00000186529 | CYP4F3   | cytochrome P450, family 4, subfamily F, polypeptide 3 [Source:HGNC Symbol;Acc:2646]                        |
| ENSG00000186951 | PPARA    | peroxisome proliferator-activated receptor alpha [Source:HGNC Symbol;Acc:9232]                             |
| ENSG00000187021 | PNLIPRP1 | pancreatic lipase-related protein 1 [Source:HGNC Symbol;Acc:9156]                                          |
| ENSG00000187048 | CYP4A11  | cytochrome P450, family 4, subfamily A, polypeptide 11 [Source:HGNC Symbol;Acc:2642]                       |
| ENSG00000187079 | TEAD1    | TEA domain family member 1 (SV40 transcriptional enhancer factor) [Source:HGNC Symbol;Acc:11714]           |
| ENSG00000187134 | AKR1C1   | aldo-keto reductase family 1, member C1 [Source:HGNC Symbol;Acc:384]                                       |
| ENSG00000188257 | PLA2G2A  | phospholipase A2, group IIA (platelets, synovial fluid) [Source:HGNC Symbol;Acc:9031]                      |
| ENSG00000188611 | ASAH2    | N-acylsphingosine amidohydrolase (non-lysosomal ceramidase) 2 [Source:HGNC Symbol;Acc:18860]               |
| ENSG00000188784 | PLA2G2E  | phospholipase A2, group IIE [Source:HGNC Symbol;Acc:13414]                                                 |
| ENSG00000196139 | AKR1C3   | aldo-keto reductase family 1, member C3 [Source:HGNC Symbol;Acc:386]                                       |
| ENSG00000196455 | PIK3R4   | phosphoinositide-3-kinase, regulatory subunit 4 [Source:HGNC Symbol;Acc:8982]                              |
| ENSG00000196475 | GK2      | glycerol kinase 2 [Source:HGNC Symbol;Acc:4291]                                                            |
| ENSG00000196498 | NCOR2    | nuclear receptor corepressor 2 [Source:HGNC Symbol;Acc:7673]                                               |
| ENSG00000196743 | GM2A     | GM2 ganglioside activator [Source:HGNC Symbol;Acc:4367]                                                    |
| ENSG00000197142 | ACSL5    | acyl-CoA synthetase long-chain family member 5 [Source:HGNC Symbol;Acc:16526]                              |
| ENSG00000197601 | FAR1     | fatty acyl CoA reductase 1 [Source:HGNC Symbol;Acc:26222]                                                  |
| ENSG00000197746 | PSAP     | prosaposin [Source:HGNC Symbol;Acc:9498]                                                                   |
| ENSG00000197905 | TEAD4    | TEA domain family member 4 [Source:HGNC Symbol;Acc:11717]                                                  |
| ENSG00000197977 | ELOVL2   | ELOVL fatty acid elongase 2 [Source:HGNC Symbol;Acc:14416]                                                 |
| ENSG00000198431 | TXNRD1   | thioredoxin reductase 1 [Source:HGNC Symbol;Acc:12437]                                                     |
| ENSG00000198457 | CYP21A2  | cytochrome P450, family 21, subfamily A, polypeptide 2 [Source:HGNC Symbol;Acc:2600]                       |
| ENSG00000198610 | AKR1C4   | aldo-keto reductase family 1, member C4 [Source:HGNC Symbol;Acc:387]                                       |
| ENSG00000198646 | NCOA6    | nuclear receptor coactivator 6 [Source:HGNC Symbol;Acc:15936]                                              |
| ENSG00000198670 | LPA      | lipoprotein, Lp(a) [Source:HGNC Symbol;Acc:6667]                                                           |
| ENSG00000198814 | GK       | glycerol kinase [Source:HGNC Symbol;Acc:4289]                                                              |
| ENSG00000198911 | SREBF2   | sterol regulatory element binding transcription factor 2 [Source:HGNC Symbol;Acc:11290]                    |
| ENSG00000198964 | SGMS1    | sphingomyelin synthase 1 [Source:HGNC Symbol;Acc:29799]                                                    |
| ENSG00000203857 | HSD3B1   | hydroxy-delta-5-steroid dehydrogenase, 3 beta- and steroid delta-isomerase 1 [Source:HGNC Symbol;Acc:5217] |
| ENSG00000203859 | HSD3B2   | hydroxy-delta-5-steroid dehydrogenase, 3 beta- and steroid delta-isomerase 2 [Source:HGNC Symbol;Acc:5218] |
| ENSG00000204099 | NEU4     | sialidase 4 [Source:HGNC Symbol;Acc:21328]                                                                 |
| ENSG00000204310 | AGPAT1   | 1-acylglycerol-3-phosphate O-acyltransferase 1 [Source:HGNC Symbol;Acc:324]                                |
| ENSG00000204385 | SLC44A4  | solute carrier family 44, member 4 [Source:HGNC Symbol;Acc:13941]                                          |
| ENSG00000204386 | NEU1     | sialidase 1 (lysosomal sialidase) [Source:HGNC Symbol;Acc:7758]                                            |
| ENSG00000205560 | CPT1B    | carnitine palmitoyltransferase 1B (muscle) [Source:HGNC Symbol;Acc:2329]                                   |
| ENSG00000205667 | ARSH     | arylsulfatase family, member H [Source:HGNC Symbol;Acc:32488]                                              |
| ENSG00000205678 | TECRL    | trans-2,3-enoyl-CoA reductase-like [Source:HGNC Symbol;Acc:27365]                                          |
| ENSG00000206324 | AGPAT1   | 1-acylglycerol-3-phosphate O-acyltransferase 1 [Source:HGNC Symbol;Acc:324]                                |
| ENSG00000206338 | CYP21A2  | cytochrome P450, family 21, subfamily A, polypeptide 2 [Source:HGNC Symbol;Acc:2600]                       |
| ENSG00000206378 | SLC44A4  | solute carrier family 44, member 4 [Source:HGNC Symbol;Acc:13941]                                          |

|                 |          |                                                                                      |
|-----------------|----------|--------------------------------------------------------------------------------------|
| ENSG00000211456 | SACM1L   | SAC1 suppressor of actin mutations 1-like (yeast) [Source:HGNC Symbol;Acc:17059]     |
| ENSG00000213316 | LTC4S    | leukotriene C4 synthase [Source:HGNC Symbol;Acc:6719]                                |
| ENSG00000213398 | LCAT     | lecithin-cholesterol acyltransferase [Source:HGNC Symbol;Acc:6522]                   |
| ENSG00000213614 | HEXA     | hexosaminidase A (alpha polypeptide) [Source:HGNC Symbol;Acc:4878]                   |
| ENSG00000213639 | PPP1CB   | protein phosphatase 1, catalytic subunit, beta isozyme [Source:HGNC Symbol;Acc:9282] |
| ENSG00000223802 | CERS1    | ceramide synthase 1 [Source:HGNC Symbol;Acc:14253]                                   |
| ENSG00000223957 | NEU1     | sialidase 1 (lysosomal sialidase) [Source:HGNC Symbol;Acc:7758]                      |
| ENSG00000226467 | AGPAT1   | 1-acylglycerol-3-phosphate O-acyltransferase 1 [Source:HGNC Symbol;Acc:324]          |
| ENSG00000227129 | NEU1     | sialidase 1 (lysosomal sialidase) [Source:HGNC Symbol;Acc:7758]                      |
| ENSG00000227315 | NEU1     | sialidase 1 (lysosomal sialidase) [Source:HGNC Symbol;Acc:7758]                      |
| ENSG00000227642 | AGPAT1   | 1-acylglycerol-3-phosphate O-acyltransferase 1 [Source:HGNC Symbol;Acc:324]          |
| ENSG00000228263 | SLC44A4  | solute carrier family 44, member 4 [Source:HGNC Symbol;Acc:13941]                    |
| ENSG00000228691 | NEU1     | sialidase 1 (lysosomal sialidase) [Source:HGNC Symbol;Acc:7758]                      |
| ENSG00000228892 | AGPAT1   | 1-acylglycerol-3-phosphate O-acyltransferase 1 [Source:HGNC Symbol;Acc:324]          |
| ENSG00000229077 | SLC44A4  | solute carrier family 44, member 4 [Source:HGNC Symbol;Acc:13941]                    |
| ENSG00000231479 | SLC44A4  | solute carrier family 44, member 4 [Source:HGNC Symbol;Acc:13941]                    |
| ENSG00000231852 | CYP21A2  | cytochrome P450, family 21, subfamily A, polypeptide 2 [Source:HGNC Symbol;Acc:2600] |
| ENSG00000232180 | SLC44A4  | solute carrier family 44, member 4 [Source:HGNC Symbol;Acc:13941]                    |
| ENSG00000232414 | CYP21A2  | cytochrome P450, family 21, subfamily A, polypeptide 2 [Source:HGNC Symbol;Acc:2600] |
| ENSG00000233151 | CYP21A2  | cytochrome P450, family 21, subfamily A, polypeptide 2 [Source:HGNC Symbol;Acc:2600] |
| ENSG00000233276 | GPX1     | glutathione peroxidase 1 [Source:HGNC Symbol;Acc:4553]                               |
| ENSG00000234343 | NEU1     | sialidase 1 (lysosomal sialidase) [Source:HGNC Symbol;Acc:7758]                      |
| ENSG00000234846 | NEU1     | sialidase 1 (lysosomal sialidase) [Source:HGNC Symbol;Acc:7758]                      |
| ENSG00000234906 | APOC2    | apolipoprotein C-II [Source:HGNC Symbol;Acc:609]                                     |
| ENSG00000235134 | CYP21A2  | cytochrome P450, family 21, subfamily A, polypeptide 2 [Source:HGNC Symbol;Acc:2600] |
| ENSG00000235336 | SLC44A4  | solute carrier family 44, member 4 [Source:HGNC Symbol;Acc:13941]                    |
| ENSG00000235758 | AGPAT1   | 1-acylglycerol-3-phosphate O-acyltransferase 1 [Source:HGNC Symbol;Acc:324]          |
| ENSG00000236873 | AGPAT1   | 1-acylglycerol-3-phosphate O-acyltransferase 1 [Source:HGNC Symbol;Acc:324]          |
| ENSG00000241119 | UGT1A9   | UDP glucuronosyltransferase 1 family, polypeptide A9 [Source:HGNC Symbol;Acc:12541]  |
| ENSG00000241878 | PISD     | phosphatidylserine decarboxylase [Source:HGNC Symbol;Acc:8999]                       |
| ENSG00000241973 | PI4KA    | phosphatidylinositol 4-kinase, catalytic, alpha [Source:HGNC Symbol;Acc:8983]        |
| ENSG00000242110 | AMACR    | alpha-methylacyl-CoA racemase [Source:HGNC Symbol;Acc:451]                           |
| ENSG00000243708 | PLA2G4B  | phospholipase A2, group IVB (cytosolic) [Source:HGNC Symbol;Acc:9036]                |
| ENSG00000260245 | ACLY     | ATP citrate lyase [Source:HGNC Symbol;Acc:115]                                       |
| ENSG00000261579 | MED22    | mediator complex subunit 22 [Source:HGNC Symbol;Acc:11477]                           |
| ENSG00000261698 | DGAT1    | diacylglycerol O-acyltransferase 1 [Source:HGNC Symbol;Acc:2843]                     |
| ENSG00000261917 | MBOAT7   | membrane bound O-acyltransferase domain containing 7 [Source:HGNC Symbol;Acc:15505]  |
| ENSG00000261981 | ENPP7    | ectonucleotide pyrophosphatase/phosphodiesterase 7 [Source:HGNC Symbol;Acc:23764]    |
| ENSG00000262053 | MBOAT7   | membrane bound O-acyltransferase domain containing 7 [Source:HGNC Symbol;Acc:15505]  |
| ENSG00000262273 | PNLIPRP1 | pancreatic lipase-related protein 1 [Source:HGNC Symbol;Acc:9156]                    |
| ENSG00000262552 | ALOX5    | arachidonate 5-lipoxygenase [Source:HGNC Symbol;Acc:435]                             |
| ENSG00000262968 | CYP2R1   | cytochrome P450, family 2, subfamily R, polypeptide 1 [Source:HGNC Symbol;Acc:20580] |
| ENSG00000262970 | ACER3    | alkaline ceramidase 3 [Source:HGNC Symbol;Acc:16066]                                 |
| ENSG00000263074 | ARSG     | arylsulfatase G [Source:HGNC Symbol;Acc:24102]                                       |
| ENSG00000263298 | ABCB11   | ATP-binding cassette, sub-family B (MDR/TAP), member 11 [Source:HGNC Symbol;Acc:42]  |
| ENSG00000265231 | AKR1C2   | aldo-keto reductase family 1, member C2 [Source:HGNC Symbol;Acc:385]                 |

|                 |          |                                                                                                                |
|-----------------|----------|----------------------------------------------------------------------------------------------------------------|
| ENSG00000265685 | AKR1C3   | aldo-keto reductase family 1, member C3 [Source:HGNC Symbol;Acc:386]                                           |
| ENSG00000266198 | PRKAB2   | protein kinase, AMP-activated, beta 2 non-catalytic subunit [Source:HGNC Symbol;Acc:9379]                      |
| ENSG00000266359 | AKR1C4   | aldo-keto reductase family 1, member C4 [Source:HGNC Symbol;Acc:387]                                           |
| ENSG00000266592 | AKR1C1   | aldo-keto reductase family 1, member C1 [Source:HGNC Symbol;Acc:384]                                           |
| ENSG00000266641 | MAPKAPK2 | mitogen-activated protein kinase-activated protein kinase 2 [Source:HGNC Symbol;Acc:6887]                      |
| ENSG00000268394 | EBP      | emopamil binding protein (sterol isomerase) [Source:HGNC Symbol;Acc:3133]                                      |
| ENSG00000268757 | ABCD1    | ATP-binding cassette, sub-family D (ALD), member 1 [Source:HGNC Symbol;Acc:61]                                 |
| ENSG00000268815 | GLA      | galactosidase, alpha [Source:HGNC Symbol;Acc:4296]                                                             |
| ENSG00000268928 | SLC25A1  | solute carrier family 25 (mitochondrial carrier; citrate transporter), member 1 [Source:HGNC Symbol;Acc:10979] |
| ENSG00000269031 | MTM1     | myotubularin 1 [Source:HGNC Symbol;Acc:7448]                                                                   |
| ENSG00000269336 | NSDHL    | NAD(P) dependent steroid dehydrogenase-like [Source:HGNC Symbol;Acc:13398]                                     |
| ENSG00000269571 | RXRA     | retinoid X receptor, alpha [Source:HGNC Symbol;Acc:10477]                                                      |
| ENSG00000269759 | MTMR1    | myotubularin related protein 1 [Source:HGNC Symbol;Acc:7449]                                                   |
| ENSG00000271019 | MBOAT7   | membrane bound O-acyltransferase domain containing 7 [Source:HGNC Symbol;Acc:15505]                            |
| ENSG00000272309 | PDSS2    | prenyl (decaprenyl) diphosphate synthase, subunit 2 [Source:HGNC Symbol;Acc:23041]                             |
| ENSG00000272809 | MBOAT7   | membrane bound O-acyltransferase domain containing 7 [Source:HGNC Symbol;Acc:15505]                            |

| Malacards liver disease |                      |                                                                                                                                 |
|-------------------------|----------------------|---------------------------------------------------------------------------------------------------------------------------------|
| Ensembl.Gene.ID         | Associated.Gene.Name | Description                                                                                                                     |
| ENSG0000001084          | GCLC                 | glutamate-cysteine ligase, catalytic subunit [Source:HGNC Symbol;Acc:4311]                                                      |
| ENSG0000001626          | CFTR                 | cystic fibrosis transmembrane conductance regulator (ATP-binding cassette sub-family C, member 7) [Source:HGNC Symbol;Acc:1884] |
| ENSG0000001631          | KRIT1                | KRIT1, ankyrin repeat containing [Source:HGNC Symbol;Acc:1573]                                                                  |
| ENSG0000002549          | LAP3                 | leucine aminopeptidase 3 [Source:HGNC Symbol;Acc:18449]                                                                         |
| ENSG0000002587          | HS3ST1               | heparan sulfate (glucosamine) 3-O-sulfotransferase 1 [Source:HGNC Symbol;Acc:5194]                                              |
| ENSG0000004779          | NDUFAB1              | NADH dehydrogenase (ubiquinone) 1, alpha/beta subcomplex, 1, 8kDa [Source:HGNC Symbol;Acc:7694]                                 |
| ENSG0000004864          | SLC25A13             | solute carrier family 25 (aspartate/glutamate carrier), member 13 [Source:HGNC Symbol;Acc:10983]                                |
| ENSG0000005381          | MPO                  | myeloperoxidase [Source:HGNC Symbol;Acc:7218]                                                                                   |
| ENSG0000005421          | PON1                 | paraoxonase 1 [Source:HGNC Symbol;Acc:9204]                                                                                     |
| ENSG0000005471          | ABCB4                | ATP-binding cassette, sub-family B (MDR/TAP), member 4 [Source:HGNC Symbol;Acc:45]                                              |
| ENSG0000006075          | CCL3                 | chemokine (C-C motif) ligand 3 [Source:HGNC Symbol;Acc:10627]                                                                   |
| ENSG0000006210          | CX3CL1               | chemokine (C-X3-C motif) ligand 1 [Source:HGNC Symbol;Acc:10647]                                                                |
| ENSG0000006831          | ADIPOR2              | adiponectin receptor 2 [Source:HGNC Symbol;Acc:24041]                                                                           |
| ENSG0000007062          | PROM1                | prominin 1 [Source:HGNC Symbol;Acc:9454]                                                                                        |
| ENSG0000007171          | NOS2                 | nitric oxide synthase 2, inducible [Source:HGNC Symbol;Acc:7873]                                                                |
| ENSG0000007908          | SELE                 | selectin E [Source:HGNC Symbol;Acc:10718]                                                                                       |
| ENSG0000007952          | NOX1                 | NADPH oxidase 1 [Source:HGNC Symbol;Acc:7889]                                                                                   |
| ENSG0000008710          | PKD1                 | polycystic kidney disease 1 (autosomal dominant) [Source:HGNC Symbol;Acc:9008]                                                  |
| ENSG0000008892          | SEC62                | SEC62 homolog (S. cerevisiae) [Source:HGNC Symbol;Acc:11846]                                                                    |
| ENSG0000009950          | MLXIPL               | MLX interacting protein-like [Source:HGNC Symbol;Acc:12744]                                                                     |
| ENSG0000010256          | UQCRC1               | ubiquinol-cytochrome c reductase core protein I [Source:HGNC Symbol;Acc:12585]                                                  |
| ENSG0000010610          | CD4                  | CD4 molecule [Source:HGNC Symbol;Acc:1678]                                                                                      |
| ENSG0000010704          | HFE                  | hemochromatosis [Source:HGNC Symbol;Acc:4886]                                                                                   |
| ENSG0000011405          | PIK3C2A              | phosphatidylinositol-4-phosphate 3-kinase, catalytic subunit type 2 alpha [Source:HGNC Symbol;Acc:8971]                         |
| ENSG0000011422          | PLAUR                | plasminogen activator, urokinase receptor [Source:HGNC Symbol;Acc:9053]                                                         |
| ENSG0000012223          | LTF                  | lactotransferrin [Source:HGNC Symbol;Acc:6720]                                                                                  |
| ENSG0000012504          | NR1H4                | nuclear receptor subfamily 1, group H, member 4 [Source:HGNC Symbol;Acc:7967]                                                   |
| ENSG0000012779          | ALOX5                | arachidonate 5-lipoxygenase [Source:HGNC Symbol;Acc:435]                                                                        |
| ENSG0000014257          | ACPP                 | acid phosphatase, prostate [Source:HGNC Symbol;Acc:125]                                                                         |
| ENSG0000015475          | BID                  | BH3 interacting domain death agonist [Source:HGNC Symbol;Acc:1050]                                                              |
| ENSG0000015520          | NPC1L1               | NPC1-like 1 [Source:HGNC Symbol;Acc:7898]                                                                                       |
| ENSG0000017427          | IGF1                 | insulin-like growth factor 1 (somatomedin C) [Source:HGNC Symbol;Acc:5464]                                                      |
| ENSG0000019991          | HGF                  | hepatocyte growth factor (hepapoietin A, scatter factor) [Source:HGNC Symbol;Acc:4893]                                          |
| ENSG0000023228          | NDUFS1               | NADH dehydrogenase (ubiquinone) Fe-S protein 1, 75kDa (NADH-coenzyme Q reductase) [Source:HGNC Symbol;Acc:7707]                 |
| ENSG0000023839          | ABCC2                | ATP-binding cassette, sub-family C (CFTR/MRP), member 2 [Source:HGNC Symbol;Acc:53]                                             |
| ENSG0000025434          | NR1H3                | nuclear receptor subfamily 1, group H, member 3 [Source:HGNC Symbol;Acc:7966]                                                   |
| ENSG0000025708          | TYMP                 | thymidine phosphorylase [Source:HGNC Symbol;Acc:3148]                                                                           |
| ENSG0000025796          | SEC63                | SEC63 homolog (S. cerevisiae) [Source:HGNC Symbol;Acc:21082]                                                                    |
| ENSG0000026103          | FAS                  | Fas cell surface death receptor [Source:HGNC Symbol;Acc:11920]                                                                  |
| ENSG0000026508          | CD44                 | CD44 molecule (Indian blood group) [Source:HGNC Symbol;Acc:1681]                                                                |
| ENSG0000027697          | IFNGR1               | interferon gamma receptor 1 [Source:HGNC Symbol;Acc:5439]                                                                       |
| ENSG0000028137          | TNFRSF1B             | tumor necrosis factor receptor superfamily, member 1B [Source:HGNC Symbol;Acc:11917]                                            |
| ENSG0000030582          | GRN                  | granulin [Source:HGNC Symbol;Acc:4601]                                                                                          |
| ENSG0000035862          | TIMP2                | TIMP metalloproteinase inhibitor 2 [Source:HGNC Symbol;Acc:11821]                                                               |
| ENSG0000036473          | OTC                  | ornithine carbamoyltransferase [Source:HGNC Symbol;Acc:8512]                                                                    |

|                |          |                                                                                                                     |
|----------------|----------|---------------------------------------------------------------------------------------------------------------------|
| ENSG0000039068 | CDH1     | cadherin 1, type 1, E-cadherin (epithelial) [Source:HGNC Symbol;Acc:1748]                                           |
| ENSG0000041982 | TNC      | tenascin C [Source:HGNC Symbol;Acc:5318]                                                                            |
| ENSG0000042980 | ADAM28   | ADAM metallopeptidase domain 28 [Source:HGNC Symbol;Acc:206]                                                        |
| ENSG0000047457 | CP       | ceruloplasmin (ferroxidase) [Source:HGNC Symbol;Acc:2295]                                                           |
| ENSG0000048649 | RSF1     | remodeling and spacing factor 1 [Source:HGNC Symbol;Acc:18118]                                                      |
| ENSG0000049239 | H6PD     | hexose-6-phosphate dehydrogenase (glucose 1-dehydrogenase) [Source:HGNC Symbol;Acc:4795]                            |
| ENSG0000049247 | UTS2     | urotensin 2 [Source:HGNC Symbol;Acc:12636]                                                                          |
| ENSG0000049540 | ELN      | elastin [Source:HGNC Symbol;Acc:3327]                                                                               |
| ENSG0000049768 | FOXP3    | forkhead box P3 [Source:HGNC Symbol;Acc:6106]                                                                       |
| ENSG0000050748 | MAPK9    | mitogen-activated protein kinase 9 [Source:HGNC Symbol;Acc:6886]                                                    |
| ENSG0000051382 | PIK3CB   | phosphatidylinositol-4,5-bisphosphate 3-kinase, catalytic subunit beta [Source:HGNC Symbol;Acc:8976]                |
| ENSG0000054967 | RELT     | RELT tumor necrosis factor receptor [Source:HGNC Symbol;Acc:13764]                                                  |
| ENSG0000055130 | CUL1     | cullin 1 [Source:HGNC Symbol;Acc:2551]                                                                              |
| ENSG0000055332 | EIF2AK2  | eukaryotic translation initiation factor 2-alpha kinase 2 [Source:HGNC Symbol;Acc:9437]                             |
| ENSG0000057149 | SERPINB3 | serpin peptidase inhibitor, clade B (ovalbumin), member 3 [Source:HGNC Symbol;Acc:10569]                            |
| ENSG0000057593 | F7       | coagulation factor VII (serum prothrombin conversion accelerator) [Source:HGNC Symbol;Acc:3544]                     |
| ENSG0000058262 | SEC61A1  | Sec61 alpha 1 subunit (S. cerevisiae) [Source:HGNC Symbol;Acc:18276]                                                |
| ENSG0000058799 | YIPF1    | Yip1 domain family, member 1 [Source:HGNC Symbol;Acc:25231]                                                         |
| ENSG0000060656 | PTPRU    | protein tyrosine phosphatase, receptor type, U [Source:HGNC Symbol;Acc:9683]                                        |
| ENSG0000062282 | DGAT2    | diacylglycerol O-acyltransferase 2 [Source:HGNC Symbol;Acc:16940]                                                   |
| ENSG0000063438 | AHRR     | aryl-hydrocarbon receptor repressor [Source:HGNC Symbol;Acc:346]                                                    |
| ENSG0000064012 | CASP8    | caspase 8, apoptosis-related cysteine peptidase [Source:HGNC Symbol;Acc:1509]                                       |
| ENSG0000065518 | NDUFB4   | NADH dehydrogenase (ubiquinone) 1 beta subcomplex, 4, 15kDa [Source:HGNC Symbol;Acc:7699]                           |
| ENSG0000065675 | PRKCK    | protein kinase C, theta [Source:HGNC Symbol;Acc:9410]                                                               |
| ENSG0000065978 | YBX1     | Y box binding protein 1 [Source:HGNC Symbol;Acc:8014]                                                               |
| ENSG0000066056 | TIE1     | tyrosine kinase with immunoglobulin-like and EGF-like domains 1 [Source:HGNC Symbol;Acc:11809]                      |
| ENSG0000066926 | FECH     | ferrochelatase [Source:HGNC Symbol;Acc:3647]                                                                        |
| ENSG0000067066 | SP100    | SP100 nuclear antigen [Source:HGNC Symbol;Acc:11206]                                                                |
| ENSG0000067082 | KLF6     | Kruppel-like factor 6 [Source:HGNC Symbol;Acc:2235]                                                                 |
| ENSG0000067182 | TNFRSF1A | tumor necrosis factor receptor superfamily, member 1A [Source:HGNC Symbol;Acc:11916]                                |
| ENSG0000068028 | RASSF1   | Ras association (RalGDS/AF-6) domain family member 1 [Source:HGNC Symbol;Acc:9882]                                  |
| ENSG0000069667 | RORA     | RAR-related orphan receptor A [Source:HGNC Symbol;Acc:10258]                                                        |
| ENSG0000070081 | NUCB2    | nucleobindin 2 [Source:HGNC Symbol;Acc:8044]                                                                        |
| ENSG0000070831 | CDC42    | cell division cycle 42 [Source:HGNC Symbol;Acc:1736]                                                                |
| ENSG0000071889 | FAM3A    | family with sequence similarity 3, member A [Source:HGNC Symbol;Acc:13749]                                          |
| ENSG0000072274 | TFRC     | transferrin receptor [Source:HGNC Symbol;Acc:11763]                                                                 |
| ENSG0000072310 | SREBF1   | sterol regulatory element binding transcription factor 1 [Source:HGNC Symbol;Acc:11289]                             |
| ENSG0000072506 | HSD17B10 | hydroxysteroid (17-beta) dehydrogenase 10 [Source:HGNC Symbol;Acc:4800]                                             |
| ENSG0000073050 | XRCC1    | X-ray repair complementing defective repair in Chinese hamster cells 1 [Source:HGNC Symbol;Acc:12828]               |
| ENSG0000073578 | SDHA     | succinate dehydrogenase complex, subunit A, flavoprotein (Fp) [Source:HGNC Symbol;Acc:10680]                        |
| ENSG0000073734 | ABCB11   | ATP-binding cassette, sub-family B (MDR/TAP), member 11 [Source:HGNC Symbol;Acc:42]                                 |
| ENSG0000073737 | DHRS9    | dehydrogenase/reductase (SDR family) member 9 [Source:HGNC Symbol;Acc:16888]                                        |
| ENSG0000073756 | PTGS2    | prostaglandin-endoperoxide synthase 2 (prostaglandin G/H synthase and cyclooxygenase) [Source:HGNC Symbol;Acc:9605] |
| ENSG0000074582 | BCS1L    | BC1 (ubiquinol-cytochrome c reductase) synthesis-like [Source:HGNC Symbol;Acc:1020]                                 |
| ENSG0000074603 | DPP8     | dipeptidyl-peptidase 8 [Source:HGNC Symbol;Acc:16490]                                                               |
| ENSG0000074695 | LMAN1    | lectin, mannose-binding, 1 [Source:HGNC Symbol;Acc:6631]                                                            |
| ENSG0000074842 | C19orf10 | chromosome 19 open reading frame 10 [Source:HGNC Symbol;Acc:16948]                                                  |

|                |          |                                                                                                                                                |
|----------------|----------|------------------------------------------------------------------------------------------------------------------------------------------------|
| ENSG0000075415 | SLC25A3  | solute carrier family 25 (mitochondrial carrier; phosphate carrier), member 3 [Source:HGNC Symbol;Acc:10989]                                   |
| ENSG0000075651 | PLD1     | phospholipase D1, phosphatidylcholine-specific [Source:HGNC Symbol;Acc:9067]                                                                   |
| ENSG0000076555 | ACACB    | acetyl-CoA carboxylase beta [Source:HGNC Symbol;Acc:85]                                                                                        |
| ENSG0000077092 | RARB     | retinoic acid receptor, beta [Source:HGNC Symbol;Acc:9865]                                                                                     |
| ENSG0000077150 | NFKB2    | nuclear factor of kappa light polypeptide gene enhancer in B-cells 2 (p49/p100) [Source:HGNC Symbol;Acc:7795]                                  |
| ENSG0000077942 | FBLN1    | fibulin 1 [Source:HGNC Symbol;Acc:3600]                                                                                                        |
| ENSG0000078098 | FAP      | fibroblast activation protein, alpha [Source:HGNC Symbol;Acc:3590]                                                                             |
| ENSG0000078401 | EDN1     | endothelin 1 [Source:HGNC Symbol;Acc:3176]                                                                                                     |
| ENSG0000078747 | ITCH     | itchy E3 ubiquitin protein ligase [Source:HGNC Symbol;Acc:13890]                                                                               |
| ENSG0000079112 | CDH17    | cadherin 17, LI cadherin (liver-intestine) [Source:HGNC Symbol;Acc:1756]                                                                       |
| ENSG0000079385 | CEACAM1  | carcinoembryonic antigen-related cell adhesion molecule 1 (biliary glycoprotein) [Source:HGNC Symbol;Acc:1814]                                 |
| ENSG0000079459 | FDFT1    | farnesyl-diphosphate farnesyltransferase 1 [Source:HGNC Symbol;Acc:3629]                                                                       |
| ENSG0000080819 | CPOX     | coproporphyrinogen oxidase [Source:HGNC Symbol;Acc:2321]                                                                                       |
| ENSG0000080824 | HSP90AA1 | heat shock protein 90kDa alpha (cytosolic), class A member 1 [Source:HGNC Symbol;Acc:5253]                                                     |
| ENSG0000081051 | AFP      | alpha-fetoprotein [Source:HGNC Symbol;Acc:317]                                                                                                 |
| ENSG0000081237 | PTPRC    | protein tyrosine phosphatase, receptor type, C [Source:HGNC Symbol;Acc:9666]                                                                   |
| ENSG0000081923 | ATP8B1   | ATPase, aminophospholipid transporter, class I, type 8B, member 1 [Source:HGNC Symbol;Acc:3706]                                                |
| ENSG0000082701 | GSK3B    | glycogen synthase kinase 3 beta [Source:HGNC Symbol;Acc:4617]                                                                                  |
| ENSG0000083807 | SLC27A5  | solute carrier family 27 (fatty acid transporter), member 5 [Source:HGNC Symbol;Acc:10999]                                                     |
| ENSG0000083857 | FAT1     | FAT atypical cadherin 1 [Source:HGNC Symbol;Acc:3595]                                                                                          |
| ENSG0000084207 | GSTP1    | glutathione S-transferase pi 1 [Source:HGNC Symbol;Acc:4638]                                                                                   |
| ENSG0000084453 | SLCO1A2  | solute carrier organic anion transporter family, member 1A2 [Source:HGNC Symbol;Acc:10956]                                                     |
| ENSG0000084674 | APOB     | apolipoprotein B [Source:HGNC Symbol;Acc:603]                                                                                                  |
| ENSG0000084734 | GCKR     | glucokinase (hexokinase 4) regulator [Source:HGNC Symbol;Acc:4196]                                                                             |
| ENSG0000084754 | HADHA    | hydroxyacyl-CoA dehydrogenase/3-ketoacyl-CoA thiolase/enoyl-CoA hydratase (trifunctional protein), alpha subunit [Source:HGNC Symbol;Acc:4801] |
| ENSG0000086991 | NOX4     | NADPH oxidase 4 [Source:HGNC Symbol;Acc:7891]                                                                                                  |
| ENSG0000087074 | PPP1R15A | protein phosphatase 1, regulatory subunit 15A [Source:HGNC Symbol;Acc:14375]                                                                   |
| ENSG0000087086 | FTL      | ferritin, light polypeptide [Source:HGNC Symbol;Acc:3999]                                                                                      |
| ENSG0000087088 | BAX      | BCL2-associated X protein [Source:HGNC Symbol;Acc:959]                                                                                         |
| ENSG0000087237 | CETP     | cholesteryl ester transfer protein, plasma [Source:HGNC Symbol;Acc:1869]                                                                       |
| ENSG0000087245 | MMP2     | matrix metalloproteinase 2 (gelatinase A, 72kDa gelatinase, 72kDa type IV collagenase) [Source:HGNC Symbol;Acc:7166]                           |
| ENSG0000089057 | SLC23A2  | solute carrier family 23 (ascorbic acid transporter), member 2 [Source:HGNC Symbol;Acc:10973]                                                  |
| ENSG0000089250 | NOS1     | nitric oxide synthase 1 (neuronal) [Source:HGNC Symbol;Acc:7872]                                                                               |
| ENSG0000089597 | GANAB    | glucosidase, alpha; neutral AB [Source:HGNC Symbol;Acc:4138]                                                                                   |
| ENSG0000089685 | BIRC5    | baculoviral IAP repeat containing 5 [Source:HGNC Symbol;Acc:593]                                                                               |
| ENSG0000090013 | BLVRB    | biliverdin reductase B (flavin reductase (NADPH)) [Source:HGNC Symbol;Acc:1063]                                                                |
| ENSG0000090266 | NDUFB2   | NADH dehydrogenase (ubiquinone) 1 beta subcomplex, 2, 8kDa [Source:HGNC Symbol;Acc:7697]                                                       |
| ENSG0000090339 | ICAM1    | intercellular adhesion molecule 1 [Source:HGNC Symbol;Acc:5344]                                                                                |
| ENSG0000090382 | LYZ      | lysozyme [Source:HGNC Symbol;Acc:6740]                                                                                                         |
| ENSG0000090534 | THPO     | thrombopoietin [Source:HGNC Symbol;Acc:11795]                                                                                                  |
| ENSG0000090659 | CD209    | CD209 molecule [Source:HGNC Symbol;Acc:1641]                                                                                                   |
| ENSG0000091490 | SEL1L3   | sel-1 suppressor of lin-12-like 3 (C. elegans) [Source:HGNC Symbol;Acc:29108]                                                                  |
| ENSG0000091513 | TF       | transferrin [Source:HGNC Symbol;Acc:11740]                                                                                                     |
| ENSG0000091583 | APOH     | apolipoprotein H (beta-2-glycoprotein I) [Source:HGNC Symbol;Acc:616]                                                                          |
| ENSG0000091831 | ESR1     | estrogen receptor 1 [Source:HGNC Symbol;Acc:3467]                                                                                              |
| ENSG0000091879 | ANGPT2   | angiopoietin 2 [Source:HGNC Symbol;Acc:485]                                                                                                    |
| ENSG0000093010 | COMT     | catechol-O-methyltransferase [Source:HGNC Symbol;Acc:2228]                                                                                     |



|                 |          |                                                                                                                       |
|-----------------|----------|-----------------------------------------------------------------------------------------------------------------------|
| ENSG00000095752 | IL11     | interleukin 11 [Source:HGNC Symbol;Acc:5966]                                                                          |
| ENSG00000096717 | SIRT1    | sirtuin 1 [Source:HGNC Symbol;Acc:14929]                                                                              |
| ENSG00000099194 | SCD      | stearoyl-CoA desaturase (delta-9-desaturase) [Source:HGNC Symbol;Acc:10571]                                           |
| ENSG00000099377 | HSD3B7   | hydroxy-delta-5-steroid dehydrogenase, 3 beta- and steroid delta-isomerase 7 [Source:HGNC Symbol;Acc:18324]           |
| ENSG00000099795 | NDUFB7   | NADH dehydrogenase (ubiquinone) 1 beta subcomplex, 7, 18kDa [Source:HGNC Symbol;Acc:7702]                             |
| ENSG00000099866 | MADCAM1  | mucosal vascular addressin cell adhesion molecule 1 [Source:HGNC Symbol;Acc:6765]                                     |
| ENSG00000099991 | CABIN1   | calcineurin binding protein 1 [Source:HGNC Symbol;Acc:24187]                                                          |
| ENSG00000100031 | GGT1     | gamma-glutamyltransferase 1 [Source:HGNC Symbol;Acc:4250]                                                             |
| ENSG00000100097 | LGALS1   | lectin, galactoside-binding, soluble, 1 [Source:HGNC Symbol;Acc:6561]                                                 |
| ENSG00000100197 | CYP2D6   | cytochrome P450, family 2, subfamily D, polypeptide 6 [Source:HGNC Symbol;Acc:2625]                                   |
| ENSG00000100219 | XBP1     | X-box binding protein 1 [Source:HGNC Symbol;Acc:12801]                                                                |
| ENSG00000100242 | SUN2     | Sad1 and UNC84 domain containing 2 [Source:HGNC Symbol;Acc:14210]                                                     |
| ENSG00000100288 | CHKB     | choline kinase beta [Source:HGNC Symbol;Acc:1938]                                                                     |
| ENSG00000100292 | HMOX1    | heme oxygenase (decycling) 1 [Source:HGNC Symbol;Acc:5013]                                                            |
| ENSG00000100300 | TSPO     | translocator protein (18kDa) [Source:HGNC Symbol;Acc:1158]                                                            |
| ENSG00000100311 | PDGFB    | platelet-derived growth factor beta polypeptide [Source:HGNC Symbol;Acc:8800]                                         |
| ENSG00000100341 | PNPLA5   | patatin-like phospholipase domain containing 5 [Source:HGNC Symbol;Acc:24888]                                         |
| ENSG00000100344 | PNPLA3   | patatin-like phospholipase domain containing 3 [Source:HGNC Symbol;Acc:18590]                                         |
| ENSG00000100347 | SAMM50   | SAMM50 sorting and assembly machinery component [Source:HGNC Symbol;Acc:24276]                                        |
| ENSG00000100385 | IL2RB    | interleukin 2 receptor, beta [Source:HGNC Symbol;Acc:6009]                                                            |
| ENSG00000100453 | GZMB     | granzyme B (granzyme 2, cytotoxic T-lymphocyte-associated serine esterase 1) [Source:HGNC Symbol;Acc:4709]            |
| ENSG00000100526 | CDKN3    | cyclin-dependent kinase inhibitor 3 [Source:HGNC Symbol;Acc:1791]                                                     |
| ENSG00000100644 | HIF1A    | hypoxia inducible factor 1, alpha subunit (basic helix-loop-helix transcription factor) [Source:HGNC Symbol;Acc:4910] |
| ENSG00000100652 | SLC10A1  | solute carrier family 10 (sodium/bile acid cotransporter), member 1 [Source:HGNC Symbol;Acc:10905]                    |
| ENSG00000100979 | PLTP     | phospholipid transfer protein [Source:HGNC Symbol;Acc:9093]                                                           |
| ENSG00000100983 | GSS      | glutathione synthetase [Source:HGNC Symbol;Acc:4624]                                                                  |
| ENSG00000100985 | MMP9     | matrix metalloproteinase 9 (gelatinase B, 92kDa gelatinase, 92kDa type IV collagenase) [Source:HGNC Symbol;Acc:7176]  |
| ENSG00000101000 | PROCR    | protein C receptor, endothelial [Source:HGNC Symbol;Acc:9452]                                                         |
| ENSG00000101017 | CD40     | CD40 molecule, TNF receptor superfamily member 5 [Source:HGNC Symbol;Acc:11919]                                       |
| ENSG00000101076 | HNF4A    | hepatocyte nuclear factor 4, alpha [Source:HGNC Symbol;Acc:5024]                                                      |
| ENSG00000101144 | BMP7     | bone morphogenetic protein 7 [Source:HGNC Symbol;Acc:1074]                                                            |
| ENSG00000101247 | NDUFA5   | NADH dehydrogenase (ubiquinone) complex I, assembly factor 5 [Source:HGNC Symbol;Acc:15899]                           |
| ENSG00000101384 | JAG1     | jagged 1 [Source:HGNC Symbol;Acc:6188]                                                                                |
| ENSG00000101425 | BPI      | bactericidal/permeability-increasing protein [Source:HGNC Symbol;Acc:1095]                                            |
| ENSG00000101439 | CST3     | cystatin C [Source:HGNC Symbol;Acc:2475]                                                                              |
| ENSG00000101444 | AHCY     | adenosylhomocysteinase [Source:HGNC Symbol;Acc:343]                                                                   |
| ENSG00000101981 | F9       | coagulation factor IX [Source:HGNC Symbol;Acc:3551]                                                                   |
| ENSG00000102245 | CD40LG   | CD40 ligand [Source:HGNC Symbol;Acc:11935]                                                                            |
| ENSG00000102265 | TIMP1    | TIMP metalloproteinase inhibitor 1 [Source:HGNC Symbol;Acc:11820]                                                     |
| ENSG00000102384 | CENPI    | centromere protein I [Source:HGNC Symbol;Acc:3968]                                                                    |
| ENSG00000102524 | TNFSF13B | tumor necrosis factor (ligand) superfamily, member 13b [Source:HGNC Symbol;Acc:11929]                                 |
| ENSG00000102755 | FLT1     | fms-related tyrosine kinase 1 [Source:HGNC Symbol;Acc:3763]                                                           |
| ENSG00000103222 | ABCC1    | ATP-binding cassette, sub-family C (CFTR/MRP), member 1 [Source:HGNC Symbol;Acc:51]                                   |
| ENSG00000103375 | AQP8     | aquaporin 8 [Source:HGNC Symbol;Acc:642]                                                                              |
| ENSG00000103876 | FAH      | fumarylacetoacetate hydrolase (fumarylacetoacetase) [Source:HGNC Symbol;Acc:3579]                                     |
| ENSG00000104043 | ATP8B4   | ATPase, class I, type 8B, member 4 [Source:HGNC Symbol;Acc:13536]                                                     |
| ENSG00000104067 | TJP1     | tight junction protein 1 [Source:HGNC Symbol;Acc:11827]                                                               |

|                 |          |                                                                                                                             |
|-----------------|----------|-----------------------------------------------------------------------------------------------------------------------------|
| ENSG00000104267 | CA2      | carbonic anhydrase II [Source:HGNC Symbol;Acc:1373]                                                                         |
| ENSG00000104324 | CPQ      | carboxypeptidase Q [Source:HGNC Symbol;Acc:16910]                                                                           |
| ENSG00000104365 | IKBKB    | inhibitor of kappa light polypeptide gene enhancer in B-cells, kinase beta [Source:HGNC Symbol;Acc:5960]                    |
| ENSG00000104368 | PLAT     | plasminogen activator, tissue [Source:HGNC Symbol;Acc:9051]                                                                 |
| ENSG00000104687 | GSR      | glutathione reductase [Source:HGNC Symbol;Acc:4623]                                                                         |
| ENSG00000104827 | CGB      | chorionic gonadotropin, beta polypeptide [Source:HGNC Symbol;Acc:1886]                                                      |
| ENSG00000104918 | RETN     | resistin [Source:HGNC Symbol;Acc:20389]                                                                                     |
| ENSG00000104938 | CLEC4M   | C-type lectin domain family 4, member M [Source:HGNC Symbol;Acc:13523]                                                      |
| ENSG00000105202 | FBL      | fibrillarin [Source:HGNC Symbol;Acc:3599]                                                                                   |
| ENSG00000105221 | AKT2     | v-akt murine thymoma viral oncogene homolog 2 [Source:HGNC Symbol;Acc:392]                                                  |
| ENSG00000105329 | TGFB1    | transforming growth factor, beta 1 [Source:HGNC Symbol;Acc:11766]                                                           |
| ENSG00000105369 | CD79A    | CD79a molecule, immunoglobulin-associated alpha [Source:HGNC Symbol;Acc:1698]                                               |
| ENSG00000105398 | SULT2A1  | sulfotransferase family, cytosolic, 2A, dehydroepiandrosterone (DHEA)-preferring, member 1 [Source:HGNC Symbol;Acc:11458]   |
| ENSG00000105550 | FGF21    | fibroblast growth factor 21 [Source:HGNC Symbol;Acc:3678]                                                                   |
| ENSG00000105647 | PIK3R2   | phosphoinositide-3-kinase, regulatory subunit 2 (beta) [Source:HGNC Symbol;Acc:8980]                                        |
| ENSG00000105697 | HAMP     | hepcidin antimicrobial peptide [Source:HGNC Symbol;Acc:15598]                                                               |
| ENSG00000105723 | GSK3A    | glycogen synthase kinase 3 alpha [Source:HGNC Symbol;Acc:4616]                                                              |
| ENSG00000105835 | NAMPT    | nicotinamide phosphoribosyltransferase [Source:HGNC Symbol;Acc:30092]                                                       |
| ENSG00000105851 | PIK3CG   | phosphatidylinositol-4,5-bisphosphate 3-kinase, catalytic subunit gamma [Source:HGNC Symbol;Acc:8978]                       |
| ENSG00000105971 | CAV2     | caveolin 2 [Source:HGNC Symbol;Acc:1528]                                                                                    |
| ENSG00000105974 | CAV1     | caveolin 1, caveolae protein, 22kDa [Source:HGNC Symbol;Acc:1527]                                                           |
| ENSG00000105976 | MET      | met proto-oncogene [Source:HGNC Symbol;Acc:7029]                                                                            |
| ENSG00000106211 | HSPB1    | heat shock 27kDa protein 1 [Source:HGNC Symbol;Acc:5246]                                                                    |
| ENSG00000106327 | TFR2     | transferrin receptor 2 [Source:HGNC Symbol;Acc:11762]                                                                       |
| ENSG00000106366 | SERPINE1 | serpin peptidase inhibitor, clade E (nexin, plasminogen activator inhibitor type 1), member 1 [Source:HGNC Symbol;Acc:8583] |
| ENSG00000106459 | NRF1     | nuclear respiratory factor 1 [Source:HGNC Symbol;Acc:7996]                                                                  |
| ENSG00000106538 | RARRES2  | retinoic acid receptor responder (tazarotene induced) 2 [Source:HGNC Symbol;Acc:9868]                                       |
| ENSG00000106617 | PRKAG2   | protein kinase, AMP-activated, gamma 2 non-catalytic subunit [Source:HGNC Symbol;Acc:9386]                                  |
| ENSG00000106991 | ENG      | endoglin [Source:HGNC Symbol;Acc:3349]                                                                                      |
| ENSG00000107562 | CXCL12   | chemokine (C-X-C motif) ligand 12 [Source:HGNC Symbol;Acc:10672]                                                            |
| ENSG00000107643 | MAPK8    | mitogen-activated protein kinase 8 [Source:HGNC Symbol;Acc:6881]                                                            |
| ENSG00000107779 | BMPR1A   | bone morphogenetic protein receptor, type IA [Source:HGNC Symbol;Acc:1076]                                                  |
| ENSG00000108064 | TFAM     | transcription factor A, mitochondrial [Source:HGNC Symbol;Acc:11741]                                                        |
| ENSG00000108176 | DNAJC12  | DnaJ (Hsp40) homolog, subfamily C, member 12 [Source:HGNC Symbol;Acc:28908]                                                 |
| ENSG00000108342 | CSF3     | colony stimulating factor 3 (granulocyte) [Source:HGNC Symbol;Acc:2438]                                                     |
| ENSG00000108479 | GALK1    | galactokinase 1 [Source:HGNC Symbol;Acc:4118]                                                                               |
| ENSG00000108559 | NUP88    | nucleoporin 88kDa [Source:HGNC Symbol;Acc:8067]                                                                             |
| ENSG00000108576 | SLC6A4   | solute carrier family 6 (neurotransmitter transporter), member 4 [Source:HGNC Symbol;Acc:11050]                             |
| ENSG00000108602 | ALDH3A1  | aldehyde dehydrogenase 3 family, member A1 [Source:HGNC Symbol;Acc:405]                                                     |
| ENSG00000108691 | CCL2     | chemokine (C-C motif) ligand 2 [Source:HGNC Symbol;Acc:10618]                                                               |
| ENSG00000108753 | HNF1B    | HNF1 homeobox B [Source:HGNC Symbol;Acc:11630]                                                                              |
| ENSG00000108788 | MLX      | MLX, MAX dimerization protein [Source:HGNC Symbol;Acc:11645]                                                                |
| ENSG00000108846 | ABCC3    | ATP-binding cassette, sub-family C (CFTR/MRP), member 3 [Source:HGNC Symbol;Acc:54]                                         |
| ENSG00000109072 | VTN      | vitronectin [Source:HGNC Symbol;Acc:12724]                                                                                  |
| ENSG00000109320 | NFKB1    | nuclear factor of kappa light polypeptide gene enhancer in B-cells 1 [Source:HGNC Symbol;Acc:7794]                          |
| ENSG00000109339 | MAPK10   | mitogen-activated protein kinase 10 [Source:HGNC Symbol;Acc:6872]                                                           |
| ENSG00000109390 | NDUFC1   | NADH dehydrogenase (ubiquinone) 1, subcomplex unknown, 1, 6kDa [Source:HGNC Symbol;Acc:7705]                                |

|                 |          |                                                                                                                                         |
|-----------------|----------|-----------------------------------------------------------------------------------------------------------------------------------------|
| ENSG00000109471 | IL2      | interleukin 2 [Source:HGNC Symbol;Acc:6001]                                                                                             |
| ENSG00000109610 | SOD3     | superoxide dismutase 3, extracellular [Source:HGNC Symbol;Acc:11181]                                                                    |
| ENSG00000109618 | SEPSECS  | Sep (O-phosphoserine) tRNA:Sec (selenocysteine) tRNA synthase [Source:HGNC Symbol;Acc:30605]                                            |
| ENSG00000109819 | PPARGC1A | peroxisome proliferator-activated receptor gamma, coactivator 1 alpha [Source:HGNC Symbol;Acc:9237]                                     |
| ENSG00000110074 | FOXRED1  | FAD-dependent oxidoreductase domain containing 1 [Source:HGNC Symbol;Acc:26927]                                                         |
| ENSG00000110090 | CPT1A    | carnitine palmitoyltransferase 1A (liver) [Source:HGNC Symbol;Acc:2328]                                                                 |
| ENSG00000110169 | HPX      | hemopexin [Source:HGNC Symbol;Acc:5171]                                                                                                 |
| ENSG00000110245 | APOC3    | apolipoprotein C-III [Source:HGNC Symbol;Acc:610]                                                                                       |
| ENSG00000110435 | PDHX     | pyruvate dehydrogenase complex, component X [Source:HGNC Symbol;Acc:21350]                                                              |
| ENSG00000110651 | CD81     | CD81 molecule [Source:HGNC Symbol;Acc:1701]                                                                                             |
| ENSG00000110680 | CALCA    | calcitonin-related polypeptide alpha [Source:HGNC Symbol;Acc:1437]                                                                      |
| ENSG00000110717 | NDUFS8   | NADH dehydrogenase (ubiquinone) Fe-S protein 8, 23kDa (NADH-coenzyme Q reductase) [Source:HGNC Symbol;Acc:7715]                         |
| ENSG00000110721 | CHKA     | choline kinase alpha [Source:HGNC Symbol;Acc:1937]                                                                                      |
| ENSG00000110799 | VWF      | von Willebrand factor [Source:HGNC Symbol;Acc:12726]                                                                                    |
| ENSG00000110921 | MVK      | mevalonate kinase [Source:HGNC Symbol;Acc:7530]                                                                                         |
| ENSG00000111057 | KRT18    | keratin 18 [Source:HGNC Symbol;Acc:6430]                                                                                                |
| ENSG00000111275 | ALDH2    | aldehyde dehydrogenase 2 family (mitochondrial) [Source:HGNC Symbol;Acc:404]                                                            |
| ENSG00000111424 | VDR      | vitamin D (1,25-dihydroxyvitamin D3) receptor [Source:HGNC Symbol;Acc:12679]                                                            |
| ENSG00000111537 | IFNG     | interferon, gamma [Source:HGNC Symbol;Acc:5438]                                                                                         |
| ENSG00000111640 | GAPDH    | glyceraldehyde-3-phosphate dehydrogenase [Source:HGNC Symbol;Acc:4141]                                                                  |
| ENSG00000111674 | ENO2     | enolase 2 (gamma, neuronal) [Source:HGNC Symbol;Acc:3353]                                                                               |
| ENSG00000111700 | SLCO1B3  | solute carrier organic anion transporter family, member 1B3 [Source:HGNC Symbol;Acc:10961]                                              |
| ENSG00000111725 | PRKAB1   | protein kinase, AMP-activated, beta 1 non-catalytic subunit [Source:HGNC Symbol;Acc:9378]                                               |
| ENSG00000111728 | ST8SIA1  | ST8 alpha-N-acetylneuraminidase alpha-2,8-sialyltransferase 1 [Source:HGNC Symbol;Acc:10869]                                            |
| ENSG00000111732 | AICDA    | activation-induced cytidine deaminase [Source:HGNC Symbol;Acc:13203]                                                                    |
| ENSG00000111775 | COX6A1   | cytochrome c oxidase subunit VIa polypeptide 1 [Source:HGNC Symbol;Acc:2277]                                                            |
| ENSG00000112062 | MAPK14   | mitogen-activated protein kinase 14 [Source:HGNC Symbol;Acc:6876]                                                                       |
| ENSG00000112096 | SOD2     | superoxide dismutase 2, mitochondrial [Source:HGNC Symbol;Acc:11180]                                                                    |
| ENSG00000112115 | IL17A    | interleukin 17A [Source:HGNC Symbol;Acc:5981]                                                                                           |
| ENSG00000112164 | GLP1R    | glucagon-like peptide 1 receptor [Source:HGNC Symbol;Acc:4324]                                                                          |
| ENSG00000112293 | GPLD1    | glycosylphosphatidylinositol specific phospholipase D1 [Source:HGNC Symbol;Acc:4459]                                                    |
| ENSG00000112486 | CCR6     | chemokine (C-C motif) receptor 6 [Source:HGNC Symbol;Acc:1607]                                                                          |
| ENSG00000112592 | TBP      | TATA box binding protein [Source:HGNC Symbol;Acc:11588]                                                                                 |
| ENSG00000112695 | COX7A2   | cytochrome c oxidase subunit VIIa polypeptide 2 (liver) [Source:HGNC Symbol;Acc:2288]                                                   |
| ENSG00000112715 | VEGFA    | vascular endothelial growth factor A [Source:HGNC Symbol;Acc:12680]                                                                     |
| ENSG00000112964 | GHR      | growth hormone receptor [Source:HGNC Symbol;Acc:4263]                                                                                   |
| ENSG00000113083 | LOX      | lysyl oxidase [Source:HGNC Symbol;Acc:6664]                                                                                             |
| ENSG00000113161 | HMGCR    | 3-hydroxy-3-methylglutaryl-CoA reductase [Source:HGNC Symbol;Acc:5006]                                                                  |
| ENSG00000113302 | IL12B    | interleukin 12B (natural killer cell stimulatory factor 2, cytotoxic lymphocyte maturation factor 2, p40) [Source:HGNC Symbol;Acc:5970] |
| ENSG00000113520 | IL4      | interleukin 4 [Source:HGNC Symbol;Acc:6014]                                                                                             |
| ENSG00000113525 | IL5      | interleukin 5 (colony-stimulating factor, eosinophil) [Source:HGNC Symbol;Acc:6016]                                                     |
| ENSG00000113580 | NR3C1    | nuclear receptor subfamily 3, group C, member 1 (glucocorticoid receptor) [Source:HGNC Symbol;Acc:7978]                                 |
| ENSG00000114026 | OGG1     | 8-oxoguanine DNA glycosylase [Source:HGNC Symbol;Acc:8125]                                                                              |
| ENSG00000114200 | BCHE     | butyrylcholinesterase [Source:HGNC Symbol;Acc:983]                                                                                      |
| ENSG00000114480 | GBE1     | glucan (1,4-alpha-), branching enzyme 1 [Source:HGNC Symbol;Acc:4180]                                                                   |
| ENSG00000114737 | CISH     | cytokine inducible SH2-containing protein [Source:HGNC Symbol;Acc:1984]                                                                 |
| ENSG00000114812 | VIPR1    | vasoactive intestinal peptide receptor 1 [Source:HGNC Symbol;Acc:12694]                                                                 |

|                 |          |                                                                                                                 |
|-----------------|----------|-----------------------------------------------------------------------------------------------------------------|
| ENSG00000115008 | IL1A     | interleukin 1, alpha [Source:HGNC Symbol;Acc:5991]                                                              |
| ENSG00000115009 | CCL20    | chemokine (C-C motif) ligand 20 [Source:HGNC Symbol;Acc:10619]                                                  |
| ENSG00000115263 | GCG      | glucagon [Source:HGNC Symbol;Acc:4191]                                                                          |
| ENSG00000115286 | NDUFS7   | NADH dehydrogenase (ubiquinone) Fe-S protein 7, 20kDa (NADH-coenzyme Q reductase) [Source:HGNC Symbol;Acc:7714] |
| ENSG00000115361 | ACADL    | acyl-CoA dehydrogenase, long chain [Source:HGNC Symbol;Acc:88]                                                  |
| ENSG00000115380 | EFEMP1   | EGF containing fibulin-like extracellular matrix protein 1 [Source:HGNC Symbol;Acc:3218]                        |
| ENSG00000115414 | FN1      | fibronectin 1 [Source:HGNC Symbol;Acc:3778]                                                                     |
| ENSG00000115419 | GLS      | glutaminase [Source:HGNC Symbol;Acc:4331]                                                                       |
| ENSG00000115457 | IGFBP2   | insulin-like growth factor binding protein 2, 36kDa [Source:HGNC Symbol;Acc:5471]                               |
| ENSG00000115523 | GNLY     | granulysin [Source:HGNC Symbol;Acc:4414]                                                                        |
| ENSG00000115592 | PRKAG3   | protein kinase, AMP-activated, gamma 3 non-catalytic subunit [Source:HGNC Symbol;Acc:9387]                      |
| ENSG00000115594 | IL1R1    | interleukin 1 receptor, type I [Source:HGNC Symbol;Acc:5993]                                                    |
| ENSG00000115718 | PROC     | protein C (inactivator of coagulation factors Va and VIIIa) [Source:HGNC Symbol;Acc:9451]                       |
| ENSG00000115944 | COX7A2L  | cytochrome c oxidase subunit VIIa polypeptide 2 like [Source:HGNC Symbol;Acc:2289]                              |
| ENSG00000116030 | SUMO1    | small ubiquitin-like modifier 1 [Source:HGNC Symbol;Acc:12502]                                                  |
| ENSG00000116044 | NFE2L2   | nuclear factor, erythroid 2-like 2 [Source:HGNC Symbol;Acc:7782]                                                |
| ENSG00000116209 | TMEM59   | transmembrane protein 59 [Source:HGNC Symbol;Acc:1239]                                                          |
| ENSG00000116237 | ICMT     | isoprenylcysteine carboxyl methyltransferase [Source:HGNC Symbol;Acc:5350]                                      |
| ENSG00000116678 | LEPR     | leptin receptor [Source:HGNC Symbol;Acc:6554]                                                                   |
| ENSG00000116815 | CD58     | CD58 molecule [Source:HGNC Symbol;Acc:1688]                                                                     |
| ENSG00000116984 | MTR      | 5-methyltetrahydrofolate-homocysteine methyltransferase [Source:HGNC Symbol;Acc:7468]                           |
| ENSG00000116996 | ZP4      | zona pellucida glycoprotein 4 [Source:HGNC Symbol;Acc:15770]                                                    |
| ENSG00000117020 | AKT3     | v-akt murine thymoma viral oncogene homolog 3 [Source:HGNC Symbol;Acc:393]                                      |
| ENSG00000117054 | ACADM    | acyl-CoA dehydrogenase, C-4 to C-12 straight chain [Source:HGNC Symbol;Acc:89]                                  |
| ENSG00000117118 | SDHB     | succinate dehydrogenase complex, subunit B, iron sulfur (lp) [Source:HGNC Symbol;Acc:10681]                     |
| ENSG00000117298 | ECE1     | endothelin converting enzyme 1 [Source:HGNC Symbol;Acc:3146]                                                    |
| ENSG00000117335 | CD46     | CD46 molecule, complement regulatory protein [Source:HGNC Symbol;Acc:6953]                                      |
| ENSG00000117394 | SLC2A1   | solute carrier family 2 (facilitated glucose transporter), member 1 [Source:HGNC Symbol;Acc:11005]              |
| ENSG00000117400 | MPL      | myeloproliferative leukemia virus oncogene [Source:HGNC Symbol;Acc:7217]                                        |
| ENSG00000117448 | AKR1A1   | aldo-keto reductase family 1, member A1 (aldehyde reductase) [Source:HGNC Symbol;Acc:380]                       |
| ENSG00000117461 | PIK3R3   | phosphoinositide-3-kinase, regulatory subunit 3 (gamma) [Source:HGNC Symbol;Acc:8981]                           |
| ENSG00000117475 | BLZF1    | basic leucine zipper nuclear factor 1 [Source:HGNC Symbol;Acc:1065]                                             |
| ENSG00000117525 | F3       | coagulation factor III (thromboplastin, tissue factor) [Source:HGNC Symbol;Acc:3541]                            |
| ENSG00000117560 | FASLG    | Fas ligand (TNF superfamily, member 6) [Source:HGNC Symbol;Acc:11936]                                           |
| ENSG00000117594 | HSD11B1  | hydroxysteroid (11-beta) dehydrogenase 1 [Source:HGNC Symbol;Acc:5208]                                          |
| ENSG00000117601 | SERPINC1 | serpin peptidase inhibitor, clade C (antithrombin), member 1 [Source:HGNC Symbol;Acc:775]                       |
| ENSG00000118137 | APOA1    | apolipoprotein A-I [Source:HGNC Symbol;Acc:600]                                                                 |
| ENSG00000118271 | TTR      | transthyretin [Source:HGNC Symbol;Acc:12405]                                                                    |
| ENSG00000118432 | CNR1     | cannabinoid receptor 1 (brain) [Source:HGNC Symbol;Acc:2159]                                                    |
| ENSG00000118513 | MYB      | v-myb avian myeloblastosis viral oncogene homolog [Source:HGNC Symbol;Acc:7545]                                 |
| ENSG00000118520 | ARG1     | arginase 1 [Source:HGNC Symbol;Acc:663]                                                                         |
| ENSG00000118523 | CTGF     | connective tissue growth factor [Source:HGNC Symbol;Acc:2500]                                                   |
| ENSG00000118702 | GHRH     | growth hormone releasing hormone [Source:HGNC Symbol;Acc:4265]                                                  |
| ENSG00000118762 | PKD2     | polycystic kidney disease 2 (autosomal dominant) [Source:HGNC Symbol;Acc:9009]                                  |
| ENSG00000118785 | SPP1     | secreted phosphoprotein 1 [Source:HGNC Symbol;Acc:11255]                                                        |
| ENSG00000119013 | NDUFB3   | NADH dehydrogenase (ubiquinone) 1 beta subcomplex, 3, 12kDa [Source:HGNC Symbol;Acc:7698]                       |
| ENSG00000119125 | GDA      | guanine deaminase [Source:HGNC Symbol;Acc:4212]                                                                 |

|                 |           |                                                                                                                    |
|-----------------|-----------|--------------------------------------------------------------------------------------------------------------------|
| ENSG00000119421 | NDUFA8    | NADH dehydrogenase (ubiquinone) 1 alpha subcomplex, 8, 19kDa [Source:HGNC Symbol;Acc:7692]                         |
| ENSG00000119888 | EPCAM     | epithelial cell adhesion molecule [Source:HGNC Symbol;Acc:11529]                                                   |
| ENSG00000119899 | SLC17A5   | solute carrier family 17 (acidic sugar transporter), member 5 [Source:HGNC Symbol;Acc:10933]                       |
| ENSG00000120053 | GOT1      | glutamic-oxaloacetic transaminase 1, soluble [Source:HGNC Symbol;Acc:4432]                                         |
| ENSG00000120054 | CPN1      | carboxypeptidase N, polypeptide 1 [Source:HGNC Symbol;Acc:2312]                                                    |
| ENSG00000120156 | TEK       | TEK tyrosine kinase, endothelial [Source:HGNC Symbol;Acc:11724]                                                    |
| ENSG00000120217 | CD274     | CD274 molecule [Source:HGNC Symbol;Acc:17635]                                                                      |
| ENSG00000120659 | TNFSF11   | tumor necrosis factor (ligand) superfamily, member 11 [Source:HGNC Symbol;Acc:11926]                               |
| ENSG00000120708 | TGFB1     | transforming growth factor, beta-induced, 68kDa [Source:HGNC Symbol;Acc:11771]                                     |
| ENSG00000120889 | TNFRSF10B | tumor necrosis factor receptor superfamily, member 10b [Source:HGNC Symbol;Acc:11905]                              |
| ENSG00000120915 | EPHX2     | epoxide hydrolase 2, cytoplasmic [Source:HGNC Symbol;Acc:3402]                                                     |
| ENSG00000120937 | NPPB      | natriuretic peptide B [Source:HGNC Symbol;Acc:7940]                                                                |
| ENSG00000121594 | CD80      | CD80 molecule [Source:HGNC Symbol;Acc:1700]                                                                        |
| ENSG00000121691 | CAT       | catalase [Source:HGNC Symbol;Acc:1516]                                                                             |
| ENSG00000121858 | TNFSF10   | tumor necrosis factor (ligand) superfamily, member 10 [Source:HGNC Symbol;Acc:11925]                               |
| ENSG00000121879 | PIK3CA    | phosphatidylinositol-4,5-bisphosphate 3-kinase, catalytic subunit alpha [Source:HGNC Symbol;Acc:8975]              |
| ENSG00000122194 | PLG       | plasminogen [Source:HGNC Symbol;Acc:9071]                                                                          |
| ENSG00000122585 | NPY       | neuropeptide Y [Source:HGNC Symbol;Acc:7955]                                                                       |
| ENSG00000122787 | AKR1D1    | aldo-keto reductase family 1, member D1 [Source:HGNC Symbol;Acc:388]                                               |
| ENSG00000123191 | ATP7B     | ATPase, Cu <sup>++</sup> transporting, beta polypeptide [Source:HGNC Symbol;Acc:870]                               |
| ENSG00000123545 | NDUFA4    | NADH dehydrogenase (ubiquinone) complex I, assembly factor 4 [Source:HGNC Symbol;Acc:21034]                        |
| ENSG00000123561 | SERPINA7  | serpin peptidase inhibitor, clade A (alpha-1 antiproteinase, antitrypsin), member 7 [Source:HGNC Symbol;Acc:11583] |
| ENSG00000124102 | PI3       | peptidase inhibitor 3, skin-derived [Source:HGNC Symbol;Acc:8947]                                                  |
| ENSG00000124107 | SLPI      | secretory leukocyte peptidase inhibitor [Source:HGNC Symbol;Acc:11092]                                             |
| ENSG00000124205 | EDN3      | endothelin 3 [Source:HGNC Symbol;Acc:3178]                                                                         |
| ENSG00000124212 | PTGIS     | prostaglandin I2 (prostacyclin) synthase [Source:HGNC Symbol;Acc:9603]                                             |
| ENSG00000124253 | PCK1      | phosphoenolpyruvate carboxykinase 1 (soluble) [Source:HGNC Symbol;Acc:8724]                                        |
| ENSG00000124299 | PEPD      | peptidase D [Source:HGNC Symbol;Acc:8840]                                                                          |
| ENSG00000124406 | ATP8A1    | ATPase, aminophospholipid transporter (APLT), class I, type 8A, member 1 [Source:HGNC Symbol;Acc:13531]            |
| ENSG00000124491 | F13A1     | coagulation factor XIII, A1 polypeptide [Source:HGNC Symbol;Acc:3531]                                              |
| ENSG00000124713 | GNMT      | glycine N-methyltransferase [Source:HGNC Symbol;Acc:4415]                                                          |
| ENSG00000124762 | CDKN1A    | cyclin-dependent kinase inhibitor 1A (p21, Cip1) [Source:HGNC Symbol;Acc:1784]                                     |
| ENSG00000125166 | GOT2      | glutamic-oxaloacetic transaminase 2, mitochondrial [Source:HGNC Symbol;Acc:4433]                                   |
| ENSG00000125255 | SLC10A2   | solute carrier family 10 (sodium/bile acid cotransporter), member 2 [Source:HGNC Symbol;Acc:10906]                 |
| ENSG00000125257 | ABCC4     | ATP-binding cassette, sub-family C (CFTR/MRP), member 4 [Source:HGNC Symbol;Acc:55]                                |
| ENSG00000125356 | NDUFA1    | NADH dehydrogenase (ubiquinone) 1 alpha subcomplex, 1, 7.5kDa [Source:HGNC Symbol;Acc:7683]                        |
| ENSG00000125414 | MYH2      | myosin, heavy chain 2, skeletal muscle, adult [Source:HGNC Symbol;Acc:7572]                                        |
| ENSG00000125538 | IL1B      | interleukin 1, beta [Source:HGNC Symbol;Acc:5992]                                                                  |
| ENSG00000125798 | FOXA2     | forkhead box A2 [Source:HGNC Symbol;Acc:5022]                                                                      |
| ENSG00000126088 | UROD      | uroporphyrinogen decarboxylase [Source:HGNC Symbol;Acc:12591]                                                      |
| ENSG00000126267 | COX6B1    | cytochrome c oxidase subunit VIb polypeptide 1 (ubiquitous) [Source:HGNC Symbol;Acc:2280]                          |
| ENSG00000126522 | ASL       | argininosuccinate lyase [Source:HGNC Symbol;Acc:746]                                                               |
| ENSG00000126545 | CSN1S1    | casein alpha s1 [Source:HGNC Symbol;Acc:2445]                                                                      |
| ENSG00000126583 | PRKCG     | protein kinase C, gamma [Source:HGNC Symbol;Acc:9402]                                                              |
| ENSG00000126838 | PZP       | pregnancy-zone protein [Source:HGNC Symbol;Acc:9750]                                                               |
| ENSG00000127184 | COX7C     | cytochrome c oxidase subunit VIIc [Source:HGNC Symbol;Acc:2292]                                                    |
| ENSG00000127191 | TRAF2     | TNF receptor-associated factor 2 [Source:HGNC Symbol;Acc:12032]                                                    |

|                 |          |                                                                                                                                      |
|-----------------|----------|--------------------------------------------------------------------------------------------------------------------------------------|
| ENSG00000127318 | IL22     | interleukin 22 [Source:HGNC Symbol;Acc:14900]                                                                                        |
| ENSG00000127472 | PLA2G5   | phospholipase A2, group V [Source:HGNC Symbol;Acc:9038]                                                                              |
| ENSG00000127540 | UQCR11   | ubiquinol-cytochrome c reductase, complex III subunit XI [Source:HGNC Symbol;Acc:30862]                                              |
| ENSG00000127831 | VIL1     | villin 1 [Source:HGNC Symbol;Acc:12690]                                                                                              |
| ENSG00000127884 | ECHS1    | enoyl CoA hydratase, short chain, 1, mitochondrial [Source:HGNC Symbol;Acc:3151]                                                     |
| ENSG00000127951 | FGL2     | fibrinogen-like 2 [Source:HGNC Symbol;Acc:3696]                                                                                      |
| ENSG00000128272 | ATF4     | activating transcription factor 4 [Source:HGNC Symbol;Acc:786]                                                                       |
| ENSG00000128609 | NDUFA5   | NADH dehydrogenase (ubiquinone) 1 alpha subcomplex, 5 [Source:HGNC Symbol;Acc:7688]                                                  |
| ENSG00000128802 | GDF2     | growth differentiation factor 2 [Source:HGNC Symbol;Acc:4217]                                                                        |
| ENSG00000129116 | PALLD    | palladin, cytoskeletal associated protein [Source:HGNC Symbol;Acc:17068]                                                             |
| ENSG00000129167 | TPH1     | tryptophan hydroxylase 1 [Source:HGNC Symbol;Acc:12008]                                                                              |
| ENSG00000129214 | SHBG     | sex hormone-binding globulin [Source:HGNC Symbol;Acc:10839]                                                                          |
| ENSG00000129277 | CCL4     | chemokine (C-C motif) ligand 4 [Source:HGNC Symbol;Acc:10630]                                                                        |
| ENSG00000129988 | LBP      | lipopolysaccharide binding protein [Source:HGNC Symbol;Acc:6517]                                                                     |
| ENSG00000130037 | KCNA5    | potassium voltage-gated channel, shaker-related subfamily, member 5 [Source:HGNC Symbol;Acc:6224]                                    |
| ENSG00000130038 | EFCAB4B  | EF-hand calcium binding domain 4B [Source:HGNC Symbol;Acc:28657]                                                                     |
| ENSG00000130164 | LDLR     | low density lipoprotein receptor [Source:HGNC Symbol;Acc:6547]                                                                       |
| ENSG00000130175 | PRKCSH   | protein kinase C substrate 80K-H [Source:HGNC Symbol;Acc:9411]                                                                       |
| ENSG00000130203 | APOE     | apolipoprotein E [Source:HGNC Symbol;Acc:613]                                                                                        |
| ENSG00000130234 | ACE2     | angiotensin I converting enzyme 2 [Source:HGNC Symbol;Acc:13557]                                                                     |
| ENSG00000130270 | ATP8B3   | ATPase, aminophospholipid transporter, class I, type 8B, member 3 [Source:HGNC Symbol;Acc:13535]                                     |
| ENSG00000130414 | NDUFA10  | NADH dehydrogenase (ubiquinone) 1 alpha subcomplex, 10, 42kDa [Source:HGNC Symbol;Acc:7684]                                          |
| ENSG00000130427 | EPO      | erythropoietin [Source:HGNC Symbol;Acc:3415]                                                                                         |
| ENSG00000130600 | H19      | H19, imprinted maternally expressed transcript (non-protein coding) [Source:HGNC Symbol;Acc:4713]                                    |
| ENSG00000130649 | CYP2E1   | cytochrome P450, family 2, subfamily E, polypeptide 1 [Source:HGNC Symbol;Acc:2631]                                                  |
| ENSG00000130707 | ASS1     | argininosuccinate synthase 1 [Source:HGNC Symbol;Acc:758]                                                                            |
| ENSG00000130988 | RGN      | regucalcin [Source:HGNC Symbol;Acc:9989]                                                                                             |
| ENSG00000131055 | COX4I2   | cytochrome c oxidase subunit IV isoform 2 (lung) [Source:HGNC Symbol;Acc:16232]                                                      |
| ENSG00000131095 | GFAP     | glial fibrillary acidic protein [Source:HGNC Symbol;Acc:4235]                                                                        |
| ENSG00000131143 | COX4I1   | cytochrome c oxidase subunit IV isoform 1 [Source:HGNC Symbol;Acc:2265]                                                              |
| ENSG00000131174 | COX7B    | cytochrome c oxidase subunit VIIb [Source:HGNC Symbol;Acc:2291]                                                                      |
| ENSG00000131187 | F12      | coagulation factor XII (Hageman factor) [Source:HGNC Symbol;Acc:3530]                                                                |
| ENSG00000131269 | ABCB7    | ATP-binding cassette, sub-family B (MDR/TAP), member 7 [Source:HGNC Symbol;Acc:48]                                                   |
| ENSG00000131408 | NR1H2    | nuclear receptor subfamily 1, group H, member 2 [Source:HGNC Symbol;Acc:7965]                                                        |
| ENSG00000131471 | AOC3     | amine oxidase, copper containing 3 [Source:HGNC Symbol;Acc:550]                                                                      |
| ENSG00000131495 | NDUFA2   | NADH dehydrogenase (ubiquinone) 1 alpha subcomplex, 2, 8kDa [Source:HGNC Symbol;Acc:7685]                                            |
| ENSG00000131759 | RARA     | retinoic acid receptor, alpha [Source:HGNC Symbol;Acc:9864]                                                                          |
| ENSG00000131773 | KHDRBS3  | KH domain containing, RNA binding, signal transduction associated 3 [Source:HGNC Symbol;Acc:18117]                                   |
| ENSG00000131791 | PRKAB2   | protein kinase, AMP-activated, beta 2 non-catalytic subunit [Source:HGNC Symbol;Acc:9379]                                            |
| ENSG00000131910 | NR0B2    | nuclear receptor subfamily 0, group B, member 2 [Source:HGNC Symbol;Acc:7961]                                                        |
| ENSG00000131981 | LGALS3   | lectin, galactoside-binding, soluble, 3 [Source:HGNC Symbol;Acc:6563]                                                                |
| ENSG00000132142 | ACACA    | acetyl-CoA carboxylase alpha [Source:HGNC Symbol;Acc:84]                                                                             |
| ENSG00000132170 | PPARG    | peroxisome proliferator-activated receptor gamma [Source:HGNC Symbol;Acc:9236]                                                       |
| ENSG00000132356 | PRKAA1   | protein kinase, AMP-activated, alpha 1 catalytic subunit [Source:HGNC Symbol;Acc:9376]                                               |
| ENSG00000132386 | SERPINF1 | serpin peptidase inhibitor, clade F (alpha-2 antiplasmin, pigment epithelium derived factor), member 1 [Source:HGNC Symbol;Acc:8824] |
| ENSG00000132646 | PCNA     | proliferating cell nuclear antigen [Source:HGNC Symbol;Acc:8729]                                                                     |
| ENSG00000132693 | CRP      | C-reactive protein, pentraxin-related [Source:HGNC Symbol;Acc:2367]                                                                  |

|                 |         |                                                                                                                       |
|-----------------|---------|-----------------------------------------------------------------------------------------------------------------------|
| ENSG00000132855 | ANGPTL3 | angiopoietin-like 3 [Source:HGNC Symbol;Acc:491]                                                                      |
| ENSG00000132906 | CASP9   | caspase 9, apoptosis-related cysteine peptidase [Source:HGNC Symbol;Acc:1511]                                         |
| ENSG00000132932 | ATP8A2  | ATPase, aminophospholipid transporter, class I, type 8A, member 2 [Source:HGNC Symbol;Acc:13533]                      |
| ENSG00000133027 | PEMT    | phosphatidylethanolamine N-methyltransferase [Source:HGNC Symbol;Acc:8830]                                            |
| ENSG00000133028 | SCO1    | SCO1 cytochrome c oxidase assembly protein [Source:HGNC Symbol;Acc:10603]                                             |
| ENSG00000133048 | CHI3L1  | chitinase 3-like 1 (cartilage glycoprotein-39) [Source:HGNC Symbol;Acc:1932]                                          |
| ENSG00000133063 | CHIT1   | chitinase 1 (chitotriosidase) [Source:HGNC Symbol;Acc:1936]                                                           |
| ENSG00000133083 | DCLK1   | doublecortin-like kinase 1 [Source:HGNC Symbol;Acc:2700]                                                              |
| ENSG00000133475 | GGT2    | gamma-glutamyltransferase 2 [Source:HGNC Symbol;Acc:4251]                                                             |
| ENSG00000133703 | KRAS    | Kirsten rat sarcoma viral oncogene homolog [Source:HGNC Symbol;Acc:6407]                                              |
| ENSG00000134001 | EIF2S1  | eukaryotic translation initiation factor 2, subunit 1 alpha, 35kDa [Source:HGNC Symbol;Acc:3265]                      |
| ENSG00000134184 | GSTM1   | glutathione S-transferase mu 1 [Source:HGNC Symbol;Acc:4632]                                                          |
| ENSG00000134202 | GSTM3   | glutathione S-transferase mu 3 (brain) [Source:HGNC Symbol;Acc:4635]                                                  |
| ENSG00000134259 | NGF     | nerve growth factor (beta polypeptide) [Source:HGNC Symbol;Acc:7808]                                                  |
| ENSG00000134318 | ROCK2   | Rho-associated, coiled-coil containing protein kinase 2 [Source:HGNC Symbol;Acc:10252]                                |
| ENSG00000134324 | LPIN1   | lipin 1 [Source:HGNC Symbol;Acc:13345]                                                                                |
| ENSG00000134352 | IL6ST   | interleukin 6 signal transducer (gp130, oncostatin M receptor) [Source:HGNC Symbol;Acc:6021]                          |
| ENSG00000134363 | FST     | follistatin [Source:HGNC Symbol;Acc:3971]                                                                             |
| ENSG00000134460 | IL2RA   | interleukin 2 receptor, alpha [Source:HGNC Symbol;Acc:6008]                                                           |
| ENSG00000134538 | SLCO1B1 | solute carrier organic anion transporter family, member 1B1 [Source:HGNC Symbol;Acc:10959]                            |
| ENSG00000134817 | APLNR   | apelin receptor [Source:HGNC Symbol;Acc:339]                                                                          |
| ENSG00000134827 | TCN1    | transcobalamin I (vitamin B12 binding protein, R binder family) [Source:HGNC Symbol;Acc:11652]                        |
| ENSG00000134852 | CLOCK   | clock circadian regulator [Source:HGNC Symbol;Acc:2082]                                                               |
| ENSG00000134996 | OSTF1   | osteoclast stimulating factor 1 [Source:HGNC Symbol;Acc:8510]                                                         |
| ENSG00000135046 | ANXA1   | annexin A1 [Source:HGNC Symbol;Acc:533]                                                                               |
| ENSG00000135052 | GOLM1   | golgi membrane protein 1 [Source:HGNC Symbol;Acc:15451]                                                               |
| ENSG00000135100 | HNF1A   | HNF1 homeobox A [Source:HGNC Symbol;Acc:11621]                                                                        |
| ENSG00000135218 | CD36    | CD36 molecule (thrombospondin receptor) [Source:HGNC Symbol;Acc:1663]                                                 |
| ENSG00000135423 | GLS2    | glutaminase 2 (liver, mitochondrial) [Source:HGNC Symbol;Acc:29570]                                                   |
| ENSG00000135437 | RDH5    | retinol dehydrogenase 5 (11-cis/9-cis) [Source:HGNC Symbol;Acc:9940]                                                  |
| ENSG00000135517 | MIP     | major intrinsic protein of lens fiber [Source:HGNC Symbol;Acc:7103]                                                   |
| ENSG00000135744 | AGT     | angiotensinogen (serpin peptidase inhibitor, clade A, member 8) [Source:HGNC Symbol;Acc:333]                          |
| ENSG00000135914 | HTR2B   | 5-hydroxytryptamine (serotonin) receptor 2B, G protein-coupled [Source:HGNC Symbol;Acc:5294]                          |
| ENSG00000135929 | CYP27A1 | cytochrome P450, family 27, subfamily A, polypeptide 1 [Source:HGNC Symbol;Acc:2605]                                  |
| ENSG00000135940 | COX5B   | cytochrome c oxidase subunit Vb [Source:HGNC Symbol;Acc:2269]                                                         |
| ENSG00000136068 | FLNB    | filamin B, beta [Source:HGNC Symbol;Acc:3755]                                                                         |
| ENSG00000136160 | EDNRB   | endothelin receptor type B [Source:HGNC Symbol;Acc:3180]                                                              |
| ENSG00000136167 | LCP1    | lymphocyte cytosolic protein 1 (L-plastin) [Source:HGNC Symbol;Acc:6528]                                              |
| ENSG00000136238 | RAC1    | ras-related C3 botulinum toxin substrate 1 (rho family, small GTP binding protein Rac1) [Source:HGNC Symbol;Acc:9801] |
| ENSG00000136244 | IL6     | interleukin 6 (interferon, beta 2) [Source:HGNC Symbol;Acc:6018]                                                      |
| ENSG00000136521 | NDUFB5  | NADH dehydrogenase (ubiquinone) 1 beta subcomplex, 5, 16kDa [Source:HGNC Symbol;Acc:7700]                             |
| ENSG00000136634 | IL10    | interleukin 10 [Source:HGNC Symbol;Acc:5962]                                                                          |
| ENSG00000136689 | IL1RN   | interleukin 1 receptor antagonist [Source:HGNC Symbol;Acc:6000]                                                       |
| ENSG00000136810 | TXN     | thioredoxin [Source:HGNC Symbol;Acc:12435]                                                                            |
| ENSG00000136869 | TLR4    | toll-like receptor 4 [Source:HGNC Symbol;Acc:11850]                                                                   |
| ENSG00000136997 | MYC     | v-myc avian myelocytomatosis viral oncogene homolog [Source:HGNC Symbol;Acc:7553]                                     |
| ENSG00000137077 | CCL21   | chemokine (C-C motif) ligand 21 [Source:HGNC Symbol;Acc:10620]                                                        |

|                 |         |                                                                                                   |
|-----------------|---------|---------------------------------------------------------------------------------------------------|
| ENSG00000137364 | TPMT    | thiopurine S-methyltransferase [Source:HGNC Symbol;Acc:12014]                                     |
| ENSG00000137462 | TLR2    | toll-like receptor 2 [Source:HGNC Symbol;Acc:11848]                                               |
| ENSG00000137496 | IL18BP  | interleukin 18 binding protein [Source:HGNC Symbol;Acc:5987]                                      |
| ENSG00000137561 | TTPA    | tocopherol (alpha) transfer protein [Source:HGNC Symbol;Acc:12404]                                |
| ENSG00000137672 | TRPC6   | transient receptor potential cation channel, subfamily C, member 6 [Source:HGNC Symbol;Acc:12338] |
| ENSG00000137710 | RDX     | radixin [Source:HGNC Symbol;Acc:9944]                                                             |
| ENSG00000137752 | CASP1   | caspase 1, apoptosis-related cysteine peptidase [Source:HGNC Symbol;Acc:1499]                     |
| ENSG00000137801 | THBS1   | thrombospondin 1 [Source:HGNC Symbol;Acc:11785]                                                   |
| ENSG00000137857 | DUOX1   | dual oxidase 1 [Source:HGNC Symbol;Acc:3062]                                                      |
| ENSG00000137869 | CYP19A1 | cytochrome P450, family 19, subfamily A, polypeptide 1 [Source:HGNC Symbol;Acc:2594]              |
| ENSG00000138030 | KHK     | ketoheokinase (fructokinase) [Source:HGNC Symbol;Acc:6315]                                        |
| ENSG00000138061 | CYP1B1  | cytochrome P450, family 1, subfamily B, polypeptide 1 [Source:HGNC Symbol;Acc:2597]               |
| ENSG00000138109 | CYP2C9  | cytochrome P450, family 2, subfamily C, polypeptide 9 [Source:HGNC Symbol;Acc:2623]               |
| ENSG00000138115 | CYP2C8  | cytochrome P450, family 2, subfamily C, polypeptide 8 [Source:HGNC Symbol;Acc:2622]               |
| ENSG00000138207 | RBP4    | retinol binding protein 4, plasma [Source:HGNC Symbol;Acc:9922]                                   |
| ENSG00000138378 | STAT4   | signal transducer and activator of transcription 4 [Source:HGNC Symbol;Acc:11365]                 |
| ENSG00000138398 | PP1G    | peptidylprolyl isomerase G (cyclophilin G) [Source:HGNC Symbol;Acc:14650]                         |
| ENSG00000138449 | SLC40A1 | solute carrier family 40 (iron-regulated transporter), member 1 [Source:HGNC Symbol;Acc:10909]    |
| ENSG00000138684 | IL21    | interleukin 21 [Source:HGNC Symbol;Acc:6005]                                                      |
| ENSG00000138685 | FGF2    | fibroblast growth factor 2 (basic) [Source:HGNC Symbol;Acc:3676]                                  |
| ENSG00000138735 | PDE5A   | phosphodiesterase 5A, cGMP-specific [Source:HGNC Symbol;Acc:8784]                                 |
| ENSG00000138755 | CXCL9   | chemokine (C-X-C motif) ligand 9 [Source:HGNC Symbol;Acc:7098]                                    |
| ENSG00000138798 | EGF     | epidermal growth factor [Source:HGNC Symbol;Acc:3229]                                             |
| ENSG00000138823 | MTTP    | microsomal triglyceride transfer protein [Source:HGNC Symbol;Acc:7467]                            |
| ENSG00000139180 | NDUFA9  | NADH dehydrogenase (ubiquinone) 1 alpha subcomplex, 9, 39kDa [Source:HGNC Symbol;Acc:7693]        |
| ENSG00000139287 | TPH2    | tryptophan hydroxylase 2 [Source:HGNC Symbol;Acc:20692]                                           |
| ENSG00000139329 | LUM     | lumican [Source:HGNC Symbol;Acc:6724]                                                             |
| ENSG00000139508 | SLC46A3 | solute carrier family 46, member 3 [Source:HGNC Symbol;Acc:27501]                                 |
| ENSG00000139567 | ACVRL1  | activin A receptor type II-like 1 [Source:HGNC Symbol;Acc:175]                                    |
| ENSG00000139610 | CELA1   | chymotrypsin-like elastase family, member 1 [Source:HGNC Symbol;Acc:3308]                         |
| ENSG00000139644 | TMBIM6  | transmembrane BAX inhibitor motif containing 6 [Source:HGNC Symbol;Acc:11723]                     |
| ENSG00000140009 | ESR2    | estrogen receptor 2 (ER beta) [Source:HGNC Symbol;Acc:3468]                                       |
| ENSG00000140279 | DUOX2   | dual oxidase 2 [Source:HGNC Symbol;Acc:13273]                                                     |
| ENSG00000140465 | CYP1A1  | cytochrome P450, family 1, subfamily A, polypeptide 1 [Source:HGNC Symbol;Acc:2595]               |
| ENSG00000140505 | CYP1A2  | cytochrome P450, family 1, subfamily A, polypeptide 2 [Source:HGNC Symbol;Acc:2596]               |
| ENSG00000140521 | POLG    | polymerase (DNA directed), gamma [Source:HGNC Symbol;Acc:9179]                                    |
| ENSG00000140740 | UQCRC2  | ubiquinol-cytochrome c reductase core protein II [Source:HGNC Symbol;Acc:12586]                   |
| ENSG00000140990 | NDUFB10 | NADH dehydrogenase (ubiquinone) 1 beta subcomplex, 10, 22kDa [Source:HGNC Symbol;Acc:7696]        |
| ENSG00000141458 | NPC1    | Niemann-Pick disease, type C1 [Source:HGNC Symbol;Acc:7897]                                       |
| ENSG00000141506 | PIK3R5  | phosphoinositide-3-kinase, regulatory subunit 5 [Source:HGNC Symbol;Acc:30035]                    |
| ENSG00000141510 | TP53    | tumor protein p53 [Source:HGNC Symbol;Acc:11998]                                                  |
| ENSG00000141646 | SMAD4   | SMAD family member 4 [Source:HGNC Symbol;Acc:6770]                                                |
| ENSG00000141736 | ERBB2   | v-erb-b2 avian erythroblastic leukemia viral oncogene homolog 2 [Source:HGNC Symbol;Acc:3430]     |
| ENSG00000142168 | SOD1    | superoxide dismutase 1, soluble [Source:HGNC Symbol;Acc:11179]                                    |
| ENSG00000142208 | AKT1    | v-akt murine thymoma viral oncogene homolog 1 [Source:HGNC Symbol;Acc:391]                        |
| ENSG00000142798 | HSPG2   | heparan sulfate proteoglycan 2 [Source:HGNC Symbol;Acc:5273]                                      |
| ENSG00000143149 | ALDH9A1 | aldehyde dehydrogenase 9 family, member A1 [Source:HGNC Symbol;Acc:412]                           |



|                 |         |                                                                                                                            |
|-----------------|---------|----------------------------------------------------------------------------------------------------------------------------|
| ENSG00000143199 | ADCY10  | adenylate cyclase 10 (soluble) [Source:HGNC Symbol;Acc:21285]                                                              |
| ENSG00000143252 | SDHC    | succinate dehydrogenase complex, subunit C, integral membrane protein, 15kDa [Source:HGNC Symbol;Acc:10682]                |
| ENSG00000143257 | NR1I3   | nuclear receptor subfamily 1, group I, member 3 [Source:HGNC Symbol;Acc:7969]                                              |
| ENSG00000143365 | RORC    | RAR-related orphan receptor C [Source:HGNC Symbol;Acc:10260]                                                               |
| ENSG00000143384 | MCL1    | myeloid cell leukemia sequence 1 (BCL2-related) [Source:HGNC Symbol;Acc:6943]                                              |
| ENSG00000143515 | ATP8B2  | ATPase, aminophospholipid transporter, class I, type 8B, member 2 [Source:HGNC Symbol;Acc:13534]                           |
| ENSG00000143627 | PKLR    | pyruvate kinase, liver and RBC [Source:HGNC Symbol;Acc:9020]                                                               |
| ENSG00000143815 | LBR     | lamin B receptor [Source:HGNC Symbol;Acc:6518]                                                                             |
| ENSG00000143819 | EPHX1   | epoxide hydrolase 1, microsomal (xenobiotic) [Source:HGNC Symbol;Acc:3401]                                                 |
| ENSG00000143839 | REN     | renin [Source:HGNC Symbol;Acc:9958]                                                                                        |
| ENSG00000143947 | RPS27A  | ribosomal protein S27a [Source:HGNC Symbol;Acc:10417]                                                                      |
| ENSG00000144231 | POLR2D  | polymerase (RNA) II (DNA directed) polypeptide D [Source:HGNC Symbol;Acc:9191]                                             |
| ENSG00000144381 | HSPD1   | heat shock 60kDa protein 1 (chaperonin) [Source:HGNC Symbol;Acc:5261]                                                      |
| ENSG00000144843 | ADPRH   | ADP-ribosylarginine hydrolase [Source:HGNC Symbol;Acc:269]                                                                 |
| ENSG00000144852 | NR1I2   | nuclear receptor subfamily 1, group I, member 2 [Source:HGNC Symbol;Acc:7968]                                              |
| ENSG00000144891 | AGTR1   | angiotensin II receptor, type 1 [Source:HGNC Symbol;Acc:336]                                                               |
| ENSG00000145192 | AHSG    | alpha-2-HS-glycoprotein [Source:HGNC Symbol;Acc:349]                                                                       |
| ENSG00000145321 | GC      | group-specific component (vitamin D binding protein) [Source:HGNC Symbol;Acc:4187]                                         |
| ENSG00000145384 | FABP2   | fatty acid binding protein 2, intestinal [Source:HGNC Symbol;Acc:3556]                                                     |
| ENSG00000145386 | CCNA2   | cyclin A2 [Source:HGNC Symbol;Acc:1578]                                                                                    |
| ENSG00000145494 | NDUFS6  | NADH dehydrogenase (ubiquinone) Fe-S protein 6, 13kDa (NADH-coenzyme Q reductase) [Source:HGNC Symbol;Acc:7713]            |
| ENSG00000145675 | PIK3R1  | phosphoinositide-3-kinase, regulatory subunit 1 (alpha) [Source:HGNC Symbol;Acc:8979]                                      |
| ENSG00000145692 | BHMT    | betaine--homocysteine S-methyltransferase [Source:HGNC Symbol;Acc:1047]                                                    |
| ENSG00000145777 | TSLP    | thymic stromal lymphopoietin [Source:HGNC Symbol;Acc:30743]                                                                |
| ENSG00000146674 | IGFBP3  | insulin-like growth factor binding protein 3 [Source:HGNC Symbol;Acc:5472]                                                 |
| ENSG00000146678 | IGFBP1  | insulin-like growth factor binding protein 1 [Source:HGNC Symbol;Acc:5469]                                                 |
| ENSG00000146701 | MDH2    | malate dehydrogenase 2, NAD (mitochondrial) [Source:HGNC Symbol;Acc:6971]                                                  |
| ENSG00000147123 | NDUFB11 | NADH dehydrogenase (ubiquinone) 1 beta subcomplex, 11, 17.3kDa [Source:HGNC Symbol;Acc:20372]                              |
| ENSG00000147257 | GPC3    | glypican 3 [Source:HGNC Symbol;Acc:4451]                                                                                   |
| ENSG00000147654 | EBAG9   | estrogen receptor binding site associated, antigen, 9 [Source:HGNC Symbol;Acc:3123]                                        |
| ENSG00000147684 | NDUFB9  | NADH dehydrogenase (ubiquinone) 1 beta subcomplex, 9, 22kDa [Source:HGNC Symbol;Acc:7704]                                  |
| ENSG00000147872 | PLIN2   | perilipin 2 [Source:HGNC Symbol;Acc:248]                                                                                   |
| ENSG00000147889 | CDKN2A  | cyclin-dependent kinase inhibitor 2A [Source:HGNC Symbol;Acc:1787]                                                         |
| ENSG00000148218 | ALAD    | aminolevulinic acid dehydratase [Source:HGNC Symbol;Acc:395]                                                               |
| ENSG00000148346 | LCN2    | lipocalin 2 [Source:HGNC Symbol;Acc:6526]                                                                                  |
| ENSG00000148672 | GLUD1   | glutamate dehydrogenase 1 [Source:HGNC Symbol;Acc:4335]                                                                    |
| ENSG00000148773 | MKI67   | marker of proliferation Ki-67 [Source:HGNC Symbol;Acc:7107]                                                                |
| ENSG00000148795 | CYP17A1 | cytochrome P450, family 17, subfamily A, polypeptide 1 [Source:HGNC Symbol;Acc:2593]                                       |
| ENSG00000148926 | ADM     | adrenomedullin [Source:HGNC Symbol;Acc:259]                                                                                |
| ENSG00000149294 | NCAM1   | neural cell adhesion molecule 1 [Source:HGNC Symbol;Acc:7656]                                                              |
| ENSG00000149968 | MMP3    | matrix metalloproteinase 3 (stromelysin 1, progelatinase) [Source:HGNC Symbol;Acc:7173]                                    |
| ENSG00000150093 | ITGB1   | integrin, beta 1 (fibronectin receptor, beta polypeptide, antigen CD29 includes MDF2, MSK12) [Source:HGNC Symbol;Acc:6153] |
| ENSG00000150526 | MIA2    | melanoma inhibitory activity 2 [Source:HGNC Symbol;Acc:18432]                                                              |
| ENSG00000150768 | DLAT    | dihydrolipoamide S-acetyltransferase [Source:HGNC Symbol;Acc:2896]                                                         |
| ENSG00000150782 | IL18    | interleukin 18 (interferon-gamma-inducing factor) [Source:HGNC Symbol;Acc:5986]                                            |
| ENSG00000150907 | FOXO1   | forkhead box O1 [Source:HGNC Symbol;Acc:3819]                                                                              |
| ENSG00000151224 | MAT1A   | methionine adenosyltransferase I, alpha [Source:HGNC Symbol;Acc:6903]                                                      |

|                 |          |                                                                                                                  |
|-----------------|----------|------------------------------------------------------------------------------------------------------------------|
| ENSG00000151366 | NDUFC2   | NADH dehydrogenase (ubiquinone) 1, subcomplex unknown, 2, 14.5kDa [Source:HGNC Symbol;Acc:7706]                  |
| ENSG00000151413 | NUBPL    | nucleotide binding protein-like [Source:HGNC Symbol;Acc:20278]                                                   |
| ENSG00000151617 | EDNRA    | endothelin receptor type A [Source:HGNC Symbol;Acc:3179]                                                         |
| ENSG00000151651 | ADAM8    | ADAM metallopeptidase domain 8 [Source:HGNC Symbol;Acc:215]                                                      |
| ENSG00000152078 | TMEM56   | transmembrane protein 56 [Source:HGNC Symbol;Acc:26477]                                                          |
| ENSG00000152767 | FARP1    | FERM, RhoGEF (ARHGEF) and pleckstrin domain protein 1 (chondrocyte-derived) [Source:HGNC Symbol;Acc:3591]        |
| ENSG00000153094 | BCL2L11  | BCL2-like 11 (apoptosis facilitator) [Source:HGNC Symbol;Acc:994]                                                |
| ENSG00000153162 | BMP6     | bone morphogenetic protein 6 [Source:HGNC Symbol;Acc:1073]                                                       |
| ENSG00000153904 | DDAH1    | dimethylarginine dimethylaminohydrolase 1 [Source:HGNC Symbol;Acc:2715]                                          |
| ENSG00000153956 | CACNA2D1 | calcium channel, voltage-dependent, alpha 2/delta subunit 1 [Source:HGNC Symbol;Acc:1399]                        |
| ENSG00000154188 | ANGPT1   | angiopoietin 1 [Source:HGNC Symbol;Acc:484]                                                                      |
| ENSG00000154229 | PRKCA    | protein kinase C, alpha [Source:HGNC Symbol;Acc:9393]                                                            |
| ENSG00000154553 | PDLIM3   | PDZ and LIM domain 3 [Source:HGNC Symbol;Acc:20767]                                                              |
| ENSG00000155463 | OXA1L    | oxidase (cytochrome c) assembly 1-like [Source:HGNC Symbol;Acc:8526]                                             |
| ENSG00000156006 | NAT2     | N-acetyltransferase 2 (arylamine N-acetyltransferase) [Source:HGNC Symbol;Acc:7646]                              |
| ENSG00000156096 | UGT2B4   | UDP glucuronosyltransferase 2 family, polypeptide B4 [Source:HGNC Symbol;Acc:12553]                              |
| ENSG00000156170 | NDUFAF6  | NADH dehydrogenase (ubiquinone) complex I, assembly factor 6 [Source:HGNC Symbol;Acc:28625]                      |
| ENSG00000156467 | UQCRCB   | ubiquinol-cytochrome c reductase binding protein [Source:HGNC Symbol;Acc:12582]                                  |
| ENSG00000156885 | COX6A2   | cytochrome c oxidase subunit VIa polypeptide 2 [Source:HGNC Symbol;Acc:2279]                                     |
| ENSG00000157005 | SST      | somatostatin [Source:HGNC Symbol;Acc:11329]                                                                      |
| ENSG00000157017 | GHRL     | ghrelin/obestatin prepropeptide [Source:HGNC Symbol;Acc:18129]                                                   |
| ENSG00000157601 | MX1      | myxovirus (influenza virus) resistance 1, interferon-inducible protein p78 (mouse) [Source:HGNC Symbol;Acc:7532] |
| ENSG00000158125 | XDH      | xanthine dehydrogenase [Source:HGNC Symbol;Acc:12805]                                                            |
| ENSG00000158578 | ALAS2    | aminolevulinic acid, delta-, synthase 2 [Source:HGNC Symbol;Acc:397]                                             |
| ENSG00000158864 | NDUFS2   | NADH dehydrogenase (ubiquinone) Fe-S protein 2, 49kDa (NADH-coenzyme Q reductase) [Source:HGNC Symbol;Acc:7708]  |
| ENSG00000159110 | IFNAR2   | interferon (alpha, beta and omega) receptor 2 [Source:HGNC Symbol;Acc:5433]                                      |
| ENSG00000159216 | RUNX1    | runt-related transcription factor 1 [Source:HGNC Symbol;Acc:10471]                                               |
| ENSG00000159251 | ACTC1    | actin, alpha, cardiac muscle 1 [Source:HGNC Symbol;Acc:143]                                                      |
| ENSG00000159346 | ADIPOR1  | adiponectin receptor 1 [Source:HGNC Symbol;Acc:24040]                                                            |
| ENSG00000159640 | ACE      | angiotensin I converting enzyme [Source:HGNC Symbol;Acc:2707]                                                    |
| ENSG00000159723 | AGRP     | agouti related protein homolog (mouse) [Source:HGNC Symbol;Acc:330]                                              |
| ENSG00000160194 | NDUFV3   | NADH dehydrogenase (ubiquinone) flavoprotein 3, 10kDa [Source:HGNC Symbol;Acc:7719]                              |
| ENSG00000160200 | CBS      | cystathionine-beta-synthase [Source:HGNC Symbol;Acc:1550]                                                        |
| ENSG00000160211 | G6PD     | glucose-6-phosphate dehydrogenase [Source:HGNC Symbol;Acc:4057]                                                  |
| ENSG00000160224 | AIRE     | autoimmune regulator [Source:HGNC Symbol;Acc:360]                                                                |
| ENSG00000160323 | ADAMTS13 | ADAM metallopeptidase with thrombospondin type 1 motif, 13 [Source:HGNC Symbol;Acc:1366]                         |
| ENSG00000160349 | LCN1     | lipocalin 1 [Source:HGNC Symbol;Acc:6525]                                                                        |
| ENSG00000160471 | COX6B2   | cytochrome c oxidase subunit VIb polypeptide 2 (testis) [Source:HGNC Symbol;Acc:24380]                           |
| ENSG00000160712 | IL6R     | interleukin 6 receptor [Source:HGNC Symbol;Acc:6019]                                                             |
| ENSG00000160791 | CCR5     | chemokine (C-C motif) receptor 5 (gene/pseudogene) [Source:HGNC Symbol;Acc:1606]                                 |
| ENSG00000160867 | FGFR4    | fibroblast growth factor receptor 4 [Source:HGNC Symbol;Acc:3691]                                                |
| ENSG00000160868 | CYP3A4   | cytochrome P450, family 3, subfamily A, polypeptide 4 [Source:HGNC Symbol;Acc:2637]                              |
| ENSG00000161011 | SQSTM1   | sequestosome 1 [Source:HGNC Symbol;Acc:11280]                                                                    |
| ENSG00000161082 | CELF5    | CUGBP, Elav-like family member 5 [Source:HGNC Symbol;Acc:14058]                                                  |
| ENSG00000161281 | COX7A1   | cytochrome c oxidase subunit VIIa polypeptide 1 (muscle) [Source:HGNC Symbol;Acc:2287]                           |
| ENSG00000161533 | ACOX1    | acyl-CoA oxidase 1, palmitoyl [Source:HGNC Symbol;Acc:119]                                                       |
| ENSG00000161570 | CCL5     | chemokine (C-C motif) ligand 5 [Source:HGNC Symbol;Acc:10632]                                                    |

|                 |           |                                                                                                                 |
|-----------------|-----------|-----------------------------------------------------------------------------------------------------------------|
| ENSG00000161944 | ASGR2     | asialoglycoprotein receptor 2 [Source:HGNC Symbol;Acc:743]                                                      |
| ENSG00000162344 | FGF19     | fibroblast growth factor 19 [Source:HGNC Symbol;Acc:3675]                                                       |
| ENSG00000162409 | PRKAA2    | protein kinase, AMP-activated, alpha 2 catalytic subunit [Source:HGNC Symbol;Acc:9377]                          |
| ENSG00000162551 | ALPL      | alkaline phosphatase, liver/bone/kidney [Source:HGNC Symbol;Acc:438]                                            |
| ENSG00000162692 | VCAM1     | vascular cell adhesion molecule 1 [Source:HGNC Symbol;Acc:12663]                                                |
| ENSG00000163069 | SGCB      | sarcoglycan, beta (43kDa dystrophin-associated glycoprotein) [Source:HGNC Symbol;Acc:10806]                     |
| ENSG00000163235 | TGFA      | transforming growth factor, alpha [Source:HGNC Symbol;Acc:11765]                                                |
| ENSG00000163251 | FZD5      | frizzled family receptor 5 [Source:HGNC Symbol;Acc:4043]                                                        |
| ENSG00000163273 | NPPC      | natriuretic peptide C [Source:HGNC Symbol;Acc:7941]                                                             |
| ENSG00000163283 | ALPP      | alkaline phosphatase, placental [Source:HGNC Symbol;Acc:439]                                                    |
| ENSG00000163286 | ALPPL2    | alkaline phosphatase, placental-like 2 [Source:HGNC Symbol;Acc:441]                                             |
| ENSG00000163520 | FBLN2     | fibulin 2 [Source:HGNC Symbol;Acc:3601]                                                                         |
| ENSG00000163586 | FABP1     | fatty acid binding protein 1, liver [Source:HGNC Symbol;Acc:3555]                                               |
| ENSG00000163599 | CTLA4     | cytotoxic T-lymphocyte-associated protein 4 [Source:HGNC Symbol;Acc:2505]                                       |
| ENSG00000163631 | ALB       | albumin [Source:HGNC Symbol;Acc:399]                                                                            |
| ENSG00000163735 | CXCL5     | chemokine (C-X-C motif) ligand 5 [Source:HGNC Symbol;Acc:10642]                                                 |
| ENSG00000164062 | APEH      | acylaminoacyl-peptide hydrolase [Source:HGNC Symbol;Acc:586]                                                    |
| ENSG00000164136 | IL15      | interleukin 15 [Source:HGNC Symbol;Acc:5977]                                                                    |
| ENSG00000164182 | NDUFAF2   | NADH dehydrogenase (ubiquinone) complex I, assembly factor 2 [Source:HGNC Symbol;Acc:28086]                     |
| ENSG00000164258 | NDUFS4    | NADH dehydrogenase (ubiquinone) Fe-S protein 4, 18kDa (NADH-coenzyme Q reductase) [Source:HGNC Symbol;Acc:7711] |
| ENSG00000164266 | SPINK1    | serine peptidase inhibitor, Kazal type 1 [Source:HGNC Symbol;Acc:11244]                                         |
| ENSG00000164305 | CASP3     | caspase 3, apoptosis-related cysteine peptidase [Source:HGNC Symbol;Acc:1504]                                   |
| ENSG00000164342 | TLR3      | toll-like receptor 3 [Source:HGNC Symbol;Acc:11849]                                                             |
| ENSG00000164344 | KLKB1     | kallikrein B, plasma (Fletcher factor) 1 [Source:HGNC Symbol;Acc:6371]                                          |
| ENSG00000164362 | TERT      | telomerase reverse transcriptase [Source:HGNC Symbol;Acc:11730]                                                 |
| ENSG00000164399 | IL3       | interleukin 3 (colony-stimulating factor, multiple) [Source:HGNC Symbol;Acc:6011]                               |
| ENSG00000164405 | UQCRCQ    | ubiquinol-cytochrome c reductase, complex III subunit VII, 9.5kDa [Source:HGNC Symbol;Acc:29594]                |
| ENSG00000164532 | TBX20     | T-box 20 [Source:HGNC Symbol;Acc:11598]                                                                         |
| ENSG00000164611 | PTTG1     | pituitary tumor-transforming 1 [Source:HGNC Symbol;Acc:9690]                                                    |
| ENSG00000164690 | SHH       | sonic hedgehog [Source:HGNC Symbol;Acc:10848]                                                                   |
| ENSG00000164761 | TNFRSF11B | tumor necrosis factor receptor superfamily, member 11b [Source:HGNC Symbol;Acc:11909]                           |
| ENSG00000164867 | NOS3      | nitric oxide synthase 3 (endothelial cell) [Source:HGNC Symbol;Acc:7876]                                        |
| ENSG00000164879 | CA3       | carbonic anhydrase III, muscle specific [Source:HGNC Symbol;Acc:1374]                                           |
| ENSG00000164889 | SLC4A2    | solute carrier family 4 (anion exchanger), member 2 [Source:HGNC Symbol;Acc:11028]                              |
| ENSG00000164919 | COX6C     | cytochrome c oxidase subunit VIc [Source:HGNC Symbol;Acc:2285]                                                  |
| ENSG00000164951 | PDP1      | pyruvate dehydrogenase phosphatase catalytic subunit 1 [Source:HGNC Symbol;Acc:9279]                            |
| ENSG00000165168 | CYBB      | cytochrome b-245, beta polypeptide [Source:HGNC Symbol;Acc:2578]                                                |
| ENSG00000165264 | NDUFB6    | NADH dehydrogenase (ubiquinone) 1 beta subcomplex, 6, 17kDa [Source:HGNC Symbol;Acc:7701]                       |
| ENSG00000165471 | MBL2      | mannose-binding lectin (protein C) 2, soluble [Source:HGNC Symbol;Acc:6922]                                     |
| ENSG00000165806 | CASP7     | caspase 7, apoptosis-related cysteine peptidase [Source:HGNC Symbol;Acc:1508]                                   |
| ENSG00000165841 | CYP2C19   | cytochrome P450, family 2, subfamily C, polypeptide 19 [Source:HGNC Symbol;Acc:2621]                            |
| ENSG00000165953 | SERPINA12 | serpin peptidase inhibitor, clade A (alpha-1 antitrypsin), member 12 [Source:HGNC Symbol;Acc:18359]             |
| ENSG00000166035 | LIPC      | lipase, hepatic [Source:HGNC Symbol;Acc:6619]                                                                   |
| ENSG00000166136 | NDUFB8    | NADH dehydrogenase (ubiquinone) 1 beta subcomplex, 8, 19kDa [Source:HGNC Symbol;Acc:7703]                       |
| ENSG00000166501 | PRKCB     | protein kinase C, beta [Source:HGNC Symbol;Acc:9395]                                                            |
| ENSG00000166558 | SLC38A8   | solute carrier family 38, member 8 [Source:HGNC Symbol;Acc:32434]                                               |
| ENSG00000166670 | MMP10     | matrix metalloproteinase 10 (stromelysin 2) [Source:HGNC Symbol;Acc:7156]                                       |

|                 |          |                                                                                                                 |
|-----------------|----------|-----------------------------------------------------------------------------------------------------------------|
| ENSG00000166710 | B2M      | beta-2-microglobulin [Source:HGNC Symbol;Acc:914]                                                               |
| ENSG00000166819 | PLIN1    | perilipin 1 [Source:HGNC Symbol;Acc:9076]                                                                       |
| ENSG00000166949 | SMAD3    | SMAD family member 3 [Source:HGNC Symbol;Acc:6769]                                                              |
| ENSG00000166986 | MARS     | methionyl-tRNA synthetase [Source:HGNC Symbol;Acc:6898]                                                         |
| ENSG00000167165 | UGT1A6   | UDP glucuronosyltransferase 1 family, polypeptide A6 [Source:HGNC Symbol;Acc:12538]                             |
| ENSG00000167244 | IGF2     | insulin-like growth factor 2 (somatomedin A) [Source:HGNC Symbol;Acc:5466]                                      |
| ENSG00000167468 | GPX4     | glutathione peroxidase 4 [Source:HGNC Symbol;Acc:4556]                                                          |
| ENSG00000167580 | AQP2     | aquaporin 2 (collecting duct) [Source:HGNC Symbol;Acc:634]                                                      |
| ENSG00000167693 | NXN      | nucleoredoxin [Source:HGNC Symbol;Acc:18008]                                                                    |
| ENSG00000167701 | GPT      | glutamic-pyruvate transaminase (alanine aminotransferase) [Source:HGNC Symbol;Acc:4552]                         |
| ENSG00000167779 | IGFBP6   | insulin-like growth factor binding protein 6 [Source:HGNC Symbol;Acc:5475]                                      |
| ENSG00000167792 | NDUFV1   | NADH dehydrogenase (ubiquinone) flavoprotein 1, 51kDa [Source:HGNC Symbol;Acc:7716]                             |
| ENSG00000167996 | FTH1     | ferritin, heavy polypeptide 1 [Source:HGNC Symbol;Acc:3976]                                                     |
| ENSG00000168036 | CTNNB1   | catenin (cadherin-associated protein), beta 1, 88kDa [Source:HGNC Symbol;Acc:2514]                              |
| ENSG00000168056 | LTBP3    | latent transforming growth factor beta binding protein 3 [Source:HGNC Symbol;Acc:6716]                          |
| ENSG00000168081 | PNOC     | prepronociceptin [Source:HGNC Symbol;Acc:9163]                                                                  |
| ENSG00000168214 | RBPJ     | recombination signal binding protein for immunoglobulin kappa J region [Source:HGNC Symbol;Acc:5724]            |
| ENSG00000168329 | CX3CR1   | chemokine (C-X3-C motif) receptor 1 [Source:HGNC Symbol;Acc:2558]                                               |
| ENSG00000168509 | HFE2     | hemochromatosis type 2 (juvenile) [Source:HGNC Symbol;Acc:4887]                                                 |
| ENSG00000168610 | STAT3    | signal transducer and activator of transcription 3 (acute-phase response factor) [Source:HGNC Symbol;Acc:11364] |
| ENSG00000168653 | NDUFS5   | NADH dehydrogenase (ubiquinone) Fe-S protein 5, 15kDa (NADH-coenzyme Q reductase) [Source:HGNC Symbol;Acc:7712] |
| ENSG00000168995 | SIGLEC7  | sialic acid binding Ig-like lectin 7 [Source:HGNC Symbol;Acc:10876]                                             |
| ENSG00000169021 | UQCRCF1  | ubiquinol-cytochrome c reductase, Rieske iron-sulfur polypeptide 1 [Source:HGNC Symbol;Acc:12587]               |
| ENSG00000169047 | IRS1     | insulin receptor substrate 1 [Source:HGNC Symbol;Acc:6125]                                                      |
| ENSG00000169174 | PCSK9    | proprotein convertase subtilisin/kexin type 9 [Source:HGNC Symbol;Acc:20001]                                    |
| ENSG00000169245 | CXCL10   | chemokine (C-X-C motif) ligand 10 [Source:HGNC Symbol;Acc:10637]                                                |
| ENSG00000169248 | CXCL11   | chemokine (C-X-C motif) ligand 11 [Source:HGNC Symbol;Acc:10638]                                                |
| ENSG00000169397 | RNASE3   | ribonuclease, RNase A family, 3 [Source:HGNC Symbol;Acc:10046]                                                  |
| ENSG00000169429 | IL8      | interleukin 8 [Source:HGNC Symbol;Acc:6025]                                                                     |
| ENSG00000169704 | GP9      | glycoprotein IX (platelet) [Source:HGNC Symbol;Acc:4444]                                                        |
| ENSG00000169710 | FASN     | fatty acid synthase [Source:HGNC Symbol;Acc:3594]                                                               |
| ENSG00000169814 | BTD      | biotinidase [Source:HGNC Symbol;Acc:1122]                                                                       |
| ENSG00000169856 | ONECUT1  | one cut homeobox 1 [Source:HGNC Symbol;Acc:8138]                                                                |
| ENSG00000169919 | GUSB     | glucuronidase, beta [Source:HGNC Symbol;Acc:4696]                                                               |
| ENSG00000170099 | SERPINA6 | serpin peptidase inhibitor, clade A (alpha-1 antitrypsin), member 6 [Source:HGNC Symbol;Acc:1540]               |
| ENSG00000170312 | CDK1     | cyclin-dependent kinase 1 [Source:HGNC Symbol;Acc:1722]                                                         |
| ENSG00000170323 | FABP4    | fatty acid binding protein 4, adipocyte [Source:HGNC Symbol;Acc:3559]                                           |
| ENSG00000170345 | FOS      | FBJ murine osteosarcoma viral oncogene homolog [Source:HGNC Symbol;Acc:3796]                                    |
| ENSG00000170421 | KRT8     | keratin 8 [Source:HGNC Symbol;Acc:6446]                                                                         |
| ENSG00000170430 | MGMT     | O-6-methylguanine-DNA methyltransferase [Source:HGNC Symbol;Acc:7059]                                           |
| ENSG00000170458 | CD14     | CD14 molecule [Source:HGNC Symbol;Acc:1628]                                                                     |
| ENSG00000170482 | SLC23A1  | solute carrier family 23 (ascorbic acid transporter), member 1 [Source:HGNC Symbol;Acc:10974]                   |
| ENSG00000170516 | COX7B2   | cytochrome c oxidase subunit VIIb2 [Source:HGNC Symbol;Acc:24381]                                               |
| ENSG00000170558 | CDH2     | cadherin 2, type 1, N-cadherin (neuronal) [Source:HGNC Symbol;Acc:1759]                                         |
| ENSG00000170899 | GSTA4    | glutathione S-transferase alpha 4 [Source:HGNC Symbol;Acc:4629]                                                 |
| ENSG00000170906 | NDUFA3   | NADH dehydrogenase (ubiquinone) 1 alpha subcomplex, 3, 9kDa [Source:HGNC Symbol;Acc:7686]                       |
| ENSG00000170927 | PKHD1    | polycystic kidney and hepatic disease 1 (autosomal recessive) [Source:HGNC Symbol;Acc:9016]                     |

|                 |         |                                                                                                                                                          |
|-----------------|---------|----------------------------------------------------------------------------------------------------------------------------------------------------------|
| ENSG00000170956 | CEACAM3 | carcinoembryonic antigen-related cell adhesion molecule 3 [Source:HGNC Symbol;Acc:1815]                                                                  |
| ENSG00000171094 | ALK     | anaplastic lymphoma receptor tyrosine kinase [Source:HGNC Symbol;Acc:427]                                                                                |
| ENSG00000171105 | INSR    | insulin receptor [Source:HGNC Symbol;Acc:6091]                                                                                                           |
| ENSG00000171124 | FUT3    | fucosyltransferase 3 (galactoside 3(4)-L-fucosyltransferase, Lewis blood group) [Source:HGNC Symbol;Acc:4014]                                            |
| ENSG00000171132 | PRKCE   | protein kinase C, epsilon [Source:HGNC Symbol;Acc:9401]                                                                                                  |
| ENSG00000171234 | UGT2B7  | UDP glucuronosyltransferase 2 family, polypeptide B7 [Source:HGNC Symbol;Acc:12554]                                                                      |
| ENSG00000171345 | KRT19   | keratin 19 [Source:HGNC Symbol;Acc:6436]                                                                                                                 |
| ENSG00000171388 | APLN    | apelin [Source:HGNC Symbol;Acc:16665]                                                                                                                    |
| ENSG00000171560 | FGA     | fibrinogen alpha chain [Source:HGNC Symbol;Acc:3661]                                                                                                     |
| ENSG00000171608 | PIK3CD  | phosphatidylinositol-4,5-bisphosphate 3-kinase, catalytic subunit delta [Source:HGNC Symbol;Acc:8977]                                                    |
| ENSG00000171791 | BCL2    | B-cell CLL/lymphoma 2 [Source:HGNC Symbol;Acc:990]                                                                                                       |
| ENSG00000171862 | PTEN    | phosphatase and tensin homolog [Source:HGNC Symbol;Acc:9588]                                                                                             |
| ENSG00000171867 | PRNP    | prion protein [Source:HGNC Symbol;Acc:9449]                                                                                                              |
| ENSG00000171988 | JMJD1C  | jumonji domain containing 1C [Source:HGNC Symbol;Acc:12313]                                                                                              |
| ENSG00000172071 | EIF2AK3 | eukaryotic translation initiation factor 2-alpha kinase 3 [Source:HGNC Symbol;Acc:3255]                                                                  |
| ENSG00000172115 | CYCS    | cytochrome c, somatic [Source:HGNC Symbol;Acc:19986]                                                                                                     |
| ENSG00000172156 | CCL11   | chemokine (C-C motif) ligand 11 [Source:HGNC Symbol;Acc:10610]                                                                                           |
| ENSG00000172215 | CXCR6   | chemokine (C-X-C motif) receptor 6 [Source:HGNC Symbol;Acc:16647]                                                                                        |
| ENSG00000172264 | MACROD2 | MACRO domain containing 2 [Source:HGNC Symbol;Acc:16126]                                                                                                 |
| ENSG00000172724 | CCL19   | chemokine (C-C motif) ligand 19 [Source:HGNC Symbol;Acc:10617]                                                                                           |
| ENSG00000172817 | CYP7B1  | cytochrome P450, family 7, subfamily B, polypeptide 1 [Source:HGNC Symbol;Acc:2652]                                                                      |
| ENSG00000172819 | RARG    | retinoic acid receptor, gamma [Source:HGNC Symbol;Acc:9866]                                                                                              |
| ENSG00000173039 | RELA    | v-rel avian reticuloendotheliosis viral oncogene homolog A [Source:HGNC Symbol;Acc:9955]                                                                 |
| ENSG00000173156 | RHOD    | ras homolog family member D [Source:HGNC Symbol;Acc:670]                                                                                                 |
| ENSG00000173327 | MAP3K11 | mitogen-activated protein kinase kinase kinase 11 [Source:HGNC Symbol;Acc:6850]                                                                          |
| ENSG00000173391 | OLR1    | oxidized low density lipoprotein (lectin-like) receptor 1 [Source:HGNC Symbol;Acc:8133]                                                                  |
| ENSG00000173442 | EHBP1L1 | EH domain binding protein 1-like 1 [Source:HGNC Symbol;Acc:30682]                                                                                        |
| ENSG00000173503 | LTA     | lymphotoxin alpha [Source:HGNC Symbol;Acc:6709]                                                                                                          |
| ENSG00000173660 | UQCRH   | ubiquinol-cytochrome c reductase hinge protein [Source:HGNC Symbol;Acc:12590]                                                                            |
| ENSG00000173905 | GOLIM4  | golgi integral membrane protein 4 [Source:HGNC Symbol;Acc:15448]                                                                                         |
| ENSG00000174059 | CD34    | CD34 molecule [Source:HGNC Symbol;Acc:1662]                                                                                                              |
| ENSG00000174156 | GSTA3   | glutathione S-transferase alpha 3 [Source:HGNC Symbol;Acc:4628]                                                                                          |
| ENSG00000174175 | SELP    | selectin P (granule membrane protein 140kDa, antigen CD62) [Source:HGNC Symbol;Acc:10721]                                                                |
| ENSG00000174697 | LEP     | leptin [Source:HGNC Symbol;Acc:6553]                                                                                                                     |
| ENSG00000174886 | NDUFA11 | NADH dehydrogenase (ubiquinone) 1 alpha subcomplex, 11, 14.7kDa [Source:HGNC Symbol;Acc:20371]                                                           |
| ENSG00000175018 | TEX36   | testis expressed 36 [Source:HGNC Symbol;Acc:31653]                                                                                                       |
| ENSG00000175040 | CHST2   | carbohydrate (N-acetylglucosamine-6-O) sulfotransferase 2 [Source:HGNC Symbol;Acc:1970]                                                                  |
| ENSG00000175164 | ABO     | ABO blood group (transferase A, alpha 1-3-N-acetylgalactosaminyltransferase; transferase B, alpha 1-3-galactosyltransferase) [Source:HGNC Symbol;Acc:79] |
| ENSG00000175197 | DDIT3   | DNA-damage-inducible transcript 3 [Source:HGNC Symbol;Acc:2726]                                                                                          |
| ENSG00000175206 | NPPA    | natriuretic peptide A [Source:HGNC Symbol;Acc:7939]                                                                                                      |
| ENSG00000175387 | SMAD2   | SMAD family member 2 [Source:HGNC Symbol;Acc:6768]                                                                                                       |
| ENSG00000175535 | PNLIP   | pancreatic lipase [Source:HGNC Symbol;Acc:9155]                                                                                                          |
| ENSG00000175564 | UCP3    | uncoupling protein 3 (mitochondrial, proton carrier) [Source:HGNC Symbol;Acc:12519]                                                                      |
| ENSG00000175567 | UCP2    | uncoupling protein 2 (mitochondrial, proton carrier) [Source:HGNC Symbol;Acc:12518]                                                                      |
| ENSG00000175727 | MLXIP   | MLX interacting protein [Source:HGNC Symbol;Acc:17055]                                                                                                   |
| ENSG00000175899 | A2M     | alpha-2-macroglobulin [Source:HGNC Symbol;Acc:7]                                                                                                         |
| ENSG00000176340 | COX8A   | cytochrome c oxidase subunit VIIIA (ubiquitous) [Source:HGNC Symbol;Acc:2294]                                                                            |

|                 |          |                                                                                                                  |
|-----------------|----------|------------------------------------------------------------------------------------------------------------------|
| ENSG00000176715 | ACSF3    | acyl-CoA synthetase family member 3 [Source:HGNC Symbol;Acc:27288]                                               |
| ENSG00000177000 | MTHFR    | methylenetetrahydrofolate reductase (NAD(P)H) [Source:HGNC Symbol;Acc:7436]                                      |
| ENSG00000177239 | MAN1B1   | mannosidase, alpha, class 1B, member 1 [Source:HGNC Symbol;Acc:6823]                                             |
| ENSG00000177426 | TGIF1    | TGFB-induced factor homeobox 1 [Source:HGNC Symbol;Acc:11776]                                                    |
| ENSG00000177575 | CD163    | CD163 molecule [Source:HGNC Symbol;Acc:1631]                                                                     |
| ENSG00000177606 | JUN      | jun proto-oncogene [Source:HGNC Symbol;Acc:6204]                                                                 |
| ENSG00000177663 | IL17RA   | interleukin 17 receptor A [Source:HGNC Symbol;Acc:5985]                                                          |
| ENSG00000178057 | NDUFAF3  | NADH dehydrogenase (ubiquinone) complex I, assembly factor 3 [Source:HGNC Symbol;Acc:29918]                      |
| ENSG00000178127 | NDUFV2   | NADH dehydrogenase (ubiquinone) flavoprotein 2, 24kDa [Source:HGNC Symbol;Acc:7717]                              |
| ENSG00000178607 | ERN1     | endoplasmic reticulum to nucleus signaling 1 [Source:HGNC Symbol;Acc:3449]                                       |
| ENSG00000178726 | THBD     | thrombomodulin [Source:HGNC Symbol;Acc:11784]                                                                    |
| ENSG00000178741 | COX5A    | cytochrome c oxidase subunit Va [Source:HGNC Symbol;Acc:2267]                                                    |
| ENSG00000179091 | CYC1     | cytochrome c-1 [Source:HGNC Symbol;Acc:2579]                                                                     |
| ENSG00000179218 | CALR     | calreticulin [Source:HGNC Symbol;Acc:1455]                                                                       |
| ENSG00000179344 | HLA-DQB1 | major histocompatibility complex, class II, DQ beta 1 [Source:HGNC Symbol;Acc:4944]                              |
| ENSG00000180210 | F2       | coagulation factor II (thrombin) [Source:HGNC Symbol;Acc:3535]                                                   |
| ENSG00000181036 | FCRL6    | Fc receptor-like 6 [Source:HGNC Symbol;Acc:31910]                                                                |
| ENSG00000181092 | ADIPOQ   | adiponectin, C1Q and collagen domain containing [Source:HGNC Symbol;Acc:13633]                                   |
| ENSG00000181143 | MUC16    | mucin 16, cell surface associated [Source:HGNC Symbol;Acc:15582]                                                 |
| ENSG00000181381 | DDX60L   | DEAD (Asp-Glu-Ala-Asp) box polypeptide 60-like [Source:HGNC Symbol;Acc:26429]                                    |
| ENSG00000181804 | SLC9A9   | solute carrier family 9, subfamily A (NHE9, cation proton antiporter 9), member 9 [Source:HGNC Symbol;Acc:20653] |
| ENSG00000181856 | SLC2A4   | solute carrier family 2 (facilitated glucose transporter), member 4 [Source:HGNC Symbol;Acc:11009]               |
| ENSG00000181929 | PRKAG1   | protein kinase, AMP-activated, gamma 1 non-catalytic subunit [Source:HGNC Symbol;Acc:9385]                       |
| ENSG00000182253 | SYNM     | synemin, intermediate filament protein [Source:HGNC Symbol;Acc:24466]                                            |
| ENSG00000182533 | CAV3     | caveolin 3 [Source:HGNC Symbol;Acc:1529]                                                                         |
| ENSG00000182718 | ANXA2    | annexin A2 [Source:HGNC Symbol;Acc:537]                                                                          |
| ENSG00000182871 | COL18A1  | collagen, type XVIII, alpha 1 [Source:HGNC Symbol;Acc:2195]                                                      |
| ENSG00000183340 | JRKL     | jerky homolog-like (mouse) [Source:HGNC Symbol;Acc:6200]                                                         |
| ENSG00000183648 | NDUFB1   | NADH dehydrogenase (ubiquinone) 1 beta subcomplex, 1, 7kDa [Source:HGNC Symbol;Acc:7695]                         |
| ENSG00000184076 | UQCR10   | ubiquinol-cytochrome c reductase, complex III subunit X [Source:HGNC Symbol;Acc:30863]                           |
| ENSG00000184381 | PLA2G6   | phospholipase A2, group VI (cytosolic, calcium-independent) [Source:HGNC Symbol;Acc:9039]                        |
| ENSG00000184557 | SOCS3    | suppressor of cytokine signaling 3 [Source:HGNC Symbol;Acc:19391]                                                |
| ENSG00000184588 | PDE4B    | phosphodiesterase 4B, cAMP-specific [Source:HGNC Symbol;Acc:8781]                                                |
| ENSG00000184674 | GSTT1    | glutathione S-transferase theta 1 [Source:HGNC Symbol;Acc:4641]                                                  |
| ENSG00000184752 | NDUFA12  | NADH dehydrogenase (ubiquinone) 1 alpha subcomplex, 12 [Source:HGNC Symbol;Acc:23987]                            |
| ENSG00000184900 | SUMO3    | small ubiquitin-like modifier 3 [Source:HGNC Symbol;Acc:11124]                                                   |
| ENSG00000184983 | NDUFA6   | NADH dehydrogenase (ubiquinone) 1 alpha subcomplex, 6, 14kDa [Source:HGNC Symbol;Acc:7690]                       |
| ENSG00000185000 | DGAT1    | diacylglycerol O-acyltransferase 1 [Source:HGNC Symbol;Acc:2843]                                                 |
| ENSG00000185010 | F8       | coagulation factor VIII, procoagulant component [Source:HGNC Symbol;Acc:3546]                                    |
| ENSG00000185291 | IL3RA    | interleukin 3 receptor, alpha (low affinity) [Source:HGNC Symbol;Acc:6012]                                       |
| ENSG00000185338 | SOCS1    | suppressor of cytokine signaling 1 [Source:HGNC Symbol;Acc:19383]                                                |
| ENSG00000185591 | SP1      | Sp1 transcription factor [Source:HGNC Symbol;Acc:11205]                                                          |
| ENSG00000185633 | NDUFA4L2 | NADH dehydrogenase (ubiquinone) 1 alpha subcomplex, 4-like 2 [Source:HGNC Symbol;Acc:29836]                      |
| ENSG00000185811 | IKZF1    | IKAROS family zinc finger 1 (Ikaros) [Source:HGNC Symbol;Acc:13176]                                              |
| ENSG00000185947 | ZNF267   | zinc finger protein 267 [Source:HGNC Symbol;Acc:13060]                                                           |
| ENSG00000185950 | IRS2     | insulin receptor substrate 2 [Source:HGNC Symbol;Acc:6126]                                                       |
| ENSG00000186010 | NDUFA13  | NADH dehydrogenase (ubiquinone) 1 alpha subcomplex, 13 [Source:HGNC Symbol;Acc:17194]                            |

|                 |          |                                                                                                                   |
|-----------------|----------|-------------------------------------------------------------------------------------------------------------------|
| ENSG00000186081 | KRT5     | keratin 5 [Source:HGNC Symbol;Acc:6442]                                                                           |
| ENSG00000186350 | RXRA     | retinoid X receptor, alpha [Source:HGNC Symbol;Acc:10477]                                                         |
| ENSG00000186810 | CXCR3    | chemokine (C-X-C motif) receptor 3 [Source:HGNC Symbol;Acc:4540]                                                  |
| ENSG00000186847 | KRT14    | keratin 14 [Source:HGNC Symbol;Acc:6416]                                                                          |
| ENSG00000186951 | PPARA    | peroxisome proliferator-activated receptor alpha [Source:HGNC Symbol;Acc:9232]                                    |
| ENSG00000187045 | TMPRSS6  | transmembrane protease, serine 6 [Source:HGNC Symbol;Acc:16517]                                                   |
| ENSG00000187048 | CYP4A11  | cytochrome P450, family 4, subfamily A, polypeptide 11 [Source:HGNC Symbol;Acc:2642]                              |
| ENSG00000187094 | CCK      | cholecystokinin [Source:HGNC Symbol;Acc:1569]                                                                     |
| ENSG00000187581 | COX8C    | cytochrome c oxidase subunit VIIIc [Source:HGNC Symbol;Acc:24382]                                                 |
| ENSG00000187608 | ISG15    | ISG15 ubiquitin-like modifier [Source:HGNC Symbol;Acc:4053]                                                       |
| ENSG00000187908 | DMBT1    | deleted in malignant brain tumors 1 [Source:HGNC Symbol;Acc:2926]                                                 |
| ENSG00000187955 | COL14A1  | collagen, type XIV, alpha 1 [Source:HGNC Symbol;Acc:2191]                                                         |
| ENSG00000188379 | IFNA2    | interferon, alpha 2 [Source:HGNC Symbol;Acc:5423]                                                                 |
| ENSG00000188389 | PDCD1    | programmed cell death 1 [Source:HGNC Symbol;Acc:8760]                                                             |
| ENSG00000188573 | FBLL1    | fibrillar-like 1 [Source:HGNC Symbol;Acc:35458]                                                                   |
| ENSG00000188612 | SUMO2    | small ubiquitin-like modifier 2 [Source:HGNC Symbol;Acc:11125]                                                    |
| ENSG00000188677 | PARVB    | parvin, beta [Source:HGNC Symbol;Acc:14653]                                                                       |
| ENSG00000188822 | CNR2     | cannabinoid receptor 2 (macrophage) [Source:HGNC Symbol;Acc:2160]                                                 |
| ENSG00000188958 | UTS2B    | urotensin 2B [Source:HGNC Symbol;Acc:30894]                                                                       |
| ENSG00000189043 | NDUFA4   | NADH dehydrogenase (ubiquinone) 1 alpha subcomplex, 4, 9kDa [Source:HGNC Symbol;Acc:7687]                         |
| ENSG00000189108 | IL1RAPL2 | interleukin 1 receptor accessory protein-like 2 [Source:HGNC Symbol;Acc:5997]                                     |
| ENSG00000189221 | MAOA     | monoamine oxidase A [Source:HGNC Symbol;Acc:6833]                                                                 |
| ENSG00000189403 | HMGB1    | high mobility group box 1 [Source:HGNC Symbol;Acc:4983]                                                           |
| ENSG00000196126 | HLA-DRB1 | major histocompatibility complex, class II, DR beta 1 [Source:HGNC Symbol;Acc:4948]                               |
| ENSG00000196136 | SERPINA3 | serpin peptidase inhibitor, clade A (alpha-1 antiproteinase, antitrypsin), member 3 [Source:HGNC Symbol;Acc:16]   |
| ENSG00000196154 | S100A4   | S100 calcium binding protein A4 [Source:HGNC Symbol;Acc:10494]                                                    |
| ENSG00000196415 | PRTN3    | proteinase 3 [Source:HGNC Symbol;Acc:9495]                                                                        |
| ENSG00000196549 | MME      | membrane metallo-endopeptidase [Source:HGNC Symbol;Acc:7154]                                                      |
| ENSG00000196611 | MMP1     | matrix metalloproteinase 1 (interstitial collagenase) [Source:HGNC Symbol;Acc:7155]                               |
| ENSG00000196616 | ADH1B    | alcohol dehydrogenase 1B (class I), beta polypeptide [Source:HGNC Symbol;Acc:250]                                 |
| ENSG00000196660 | SLC30A10 | solute carrier family 30, member 10 [Source:HGNC Symbol;Acc:25355]                                                |
| ENSG00000196735 | HLA-DQA1 | major histocompatibility complex, class II, DQ alpha 1 [Source:HGNC Symbol;Acc:4942]                              |
| ENSG00000196839 | ADA      | adenosine deaminase [Source:HGNC Symbol;Acc:186]                                                                  |
| ENSG00000196954 | CASP4    | caspase 4, apoptosis-related cysteine peptidase [Source:HGNC Symbol;Acc:1505]                                     |
| ENSG00000197110 | IFNL3    | interferon, lambda 3 [Source:HGNC Symbol;Acc:18365]                                                               |
| ENSG00000197249 | SERPINA1 | serpin peptidase inhibitor, clade A (alpha-1 antiproteinase, antitrypsin), member 1 [Source:HGNC Symbol;Acc:8941] |
| ENSG00000197408 | CYP2B6   | cytochrome P450, family 2, subfamily B, polypeptide 6 [Source:HGNC Symbol;Acc:2615]                               |
| ENSG00000197416 | FABP12   | fatty acid binding protein 12 [Source:HGNC Symbol;Acc:34524]                                                      |
| ENSG00000197442 | MAP3K5   | mitogen-activated protein kinase kinase 5 [Source:HGNC Symbol;Acc:6857]                                           |
| ENSG00000197461 | PDGFA    | platelet-derived growth factor alpha polypeptide [Source:HGNC Symbol;Acc:8799]                                    |
| ENSG00000197467 | COL13A1  | collagen, type XIII, alpha 1 [Source:HGNC Symbol;Acc:2190]                                                        |
| ENSG00000197561 | ELANE    | elastase, neutrophil expressed [Source:HGNC Symbol;Acc:3309]                                                      |
| ENSG00000197594 | ENPP1    | ectonucleotide pyrophosphatase/phosphodiesterase 1 [Source:HGNC Symbol;Acc:3356]                                  |
| ENSG00000197632 | SERPINB2 | serpin peptidase inhibitor, clade B (ovalbumin), member 2 [Source:HGNC Symbol;Acc:8584]                           |
| ENSG00000197635 | DPP4     | dipeptidyl-peptidase 4 [Source:HGNC Symbol;Acc:3009]                                                              |
| ENSG00000197646 | PDCD1LG2 | programmed cell death 1 ligand 2 [Source:HGNC Symbol;Acc:18731]                                                   |
| ENSG00000197747 | S100A10  | S100 calcium binding protein A10 [Source:HGNC Symbol;Acc:10487]                                                   |

|                 |          |                                                                                                      |
|-----------------|----------|------------------------------------------------------------------------------------------------------|
| ENSG00000197919 | IFNA1    | interferon, alpha 1 [Source:HGNC Symbol;Acc:5417]                                                    |
| ENSG00000197971 | MBP      | myelin basic protein [Source:HGNC Symbol;Acc:6925]                                                   |
| ENSG00000198099 | ADH4     | alcohol dehydrogenase 4 (class II), pi polypeptide [Source:HGNC Symbol;Acc:252]                      |
| ENSG00000198130 | HIBCH    | 3-hydroxyisobutyryl-CoA hydrolase [Source:HGNC Symbol;Acc:4908]                                      |
| ENSG00000198502 | HLA-DRB5 | major histocompatibility complex, class II, DR beta 5 [Source:HGNC Symbol;Acc:4953]                  |
| ENSG00000198610 | AKR1C4   | aldo-keto reductase family 1, member C4 [Source:HGNC Symbol;Acc:387]                                 |
| ENSG00000198650 | TAT      | tyrosine aminotransferase [Source:HGNC Symbol;Acc:11573]                                             |
| ENSG00000198670 | LPA      | lipoprotein, Lp(a) [Source:HGNC Symbol;Acc:6667]                                                     |
| ENSG00000198681 | MAGEA1   | melanoma antigen family A, 1 (directs expression of antigen MZ2-E) [Source:HGNC Symbol;Acc:6796]     |
| ENSG00000198695 | MT-ND6   | mitochondrially encoded NADH dehydrogenase 6 [Source:HGNC Symbol;Acc:7462]                           |
| ENSG00000198712 | MT-CO2   | mitochondrially encoded cytochrome c oxidase II [Source:HGNC Symbol;Acc:7421]                        |
| ENSG00000198719 | DLL1     | delta-like 1 (Drosophila) [Source:HGNC Symbol;Acc:2908]                                              |
| ENSG00000198727 | MT-CYB   | mitochondrially encoded cytochrome b [Source:HGNC Symbol;Acc:7427]                                   |
| ENSG00000198734 | F5       | coagulation factor V (proaccelerin, labile factor) [Source:HGNC Symbol;Acc:3542]                     |
| ENSG00000198786 | MT-ND5   | mitochondrially encoded NADH dehydrogenase 5 [Source:HGNC Symbol;Acc:7461]                           |
| ENSG00000198804 | MT-CO1   | mitochondrially encoded cytochrome c oxidase I [Source:HGNC Symbol;Acc:7419]                         |
| ENSG00000198840 | MT-ND3   | mitochondrially encoded NADH dehydrogenase 3 [Source:HGNC Symbol;Acc:7458]                           |
| ENSG00000198911 | SREBF2   | sterol regulatory element binding transcription factor 2 [Source:HGNC Symbol;Acc:11290]              |
| ENSG00000198938 | MT-CO3   | mitochondrially encoded cytochrome c oxidase III [Source:HGNC Symbol;Acc:7422]                       |
| ENSG00000202237 | RNU6-53P | RNA, U6 small nuclear 53, pseudogene [Source:HGNC Symbol;Acc:42543]                                  |
| ENSG00000203710 | CR1      | complement component (3b/4b) receptor 1 (Knops blood group) [Source:HGNC Symbol;Acc:2334]            |
| ENSG00000204217 | BMPR2    | bone morphogenetic protein receptor, type II (serine/threonine kinase) [Source:HGNC Symbol;Acc:1078] |
| ENSG00000204267 | TAP2     | transporter 2, ATP-binding cassette, sub-family B (MDR/TAP) [Source:HGNC Symbol;Acc:44]              |
| ENSG00000204305 | AGER     | advanced glycosylation end product-specific receptor [Source:HGNC Symbol;Acc:320]                    |
| ENSG00000204370 | SDHD     | succinate dehydrogenase complex, subunit D, integral membrane protein [Source:HGNC Symbol;Acc:10683] |
| ENSG00000204444 | APOM     | apolipoprotein M [Source:HGNC Symbol;Acc:13916]                                                      |
| ENSG00000204487 | LTB      | lymphotoxin beta (TNF superfamily, member 3) [Source:HGNC Symbol;Acc:6711]                           |
| ENSG00000204490 | TNF      | tumor necrosis factor [Source:HGNC Symbol;Acc:11892]                                                 |
| ENSG00000204525 | HLA-C    | major histocompatibility complex, class I, C [Source:HGNC Symbol;Acc:4933]                           |
| ENSG00000204909 | SPINK9   | serine peptidase inhibitor, Kazal type 9 [Source:HGNC Symbol;Acc:32951]                              |
| ENSG00000205667 | ARSH     | arylsulfatase family, member H [Source:HGNC Symbol;Acc:32488]                                        |
| ENSG00000206073 | SERPINB4 | serpin peptidase inhibitor, clade B (ovalbumin), member 4 [Source:HGNC Symbol;Acc:10570]             |
| ENSG00000206235 | TAP2     | transporter 2, ATP-binding cassette, sub-family B (MDR/TAP) [Source:HGNC Symbol;Acc:44]              |
| ENSG00000206237 | HLA-DQB1 | major histocompatibility complex, class II, DQ beta 1 [Source:HGNC Symbol;Acc:4944]                  |
| ENSG00000206240 | HLA-DRB1 | major histocompatibility complex, class II, DR beta 1 [Source:HGNC Symbol;Acc:4948]                  |
| ENSG00000206299 | TAP2     | transporter 2, ATP-binding cassette, sub-family B (MDR/TAP) [Source:HGNC Symbol;Acc:44]              |
| ENSG00000206302 | HLA-DQB1 | major histocompatibility complex, class II, DQ beta 1 [Source:HGNC Symbol;Acc:4944]                  |
| ENSG00000206305 | HLA-DQA1 | major histocompatibility complex, class II, DQ alpha 1 [Source:HGNC Symbol;Acc:4942]                 |
| ENSG00000206306 | HLA-DRB1 | major histocompatibility complex, class II, DR beta 1 [Source:HGNC Symbol;Acc:4948]                  |
| ENSG00000206320 | AGER     | advanced glycosylation end product-specific receptor [Source:HGNC Symbol;Acc:320]                    |
| ENSG00000206340 | C4A      | complement component 4A (Rodgers blood group) [Source:HGNC Symbol;Acc:1323]                          |
| ENSG00000206409 | APOM     | apolipoprotein M [Source:HGNC Symbol;Acc:13916]                                                      |
| ENSG00000206435 | HLA-C    | major histocompatibility complex, class I, C [Source:HGNC Symbol;Acc:4933]                           |
| ENSG00000206437 | LTB      | lymphotoxin beta (TNF superfamily, member 3) [Source:HGNC Symbol;Acc:6711]                           |
| ENSG00000206439 | TNF      | tumor necrosis factor [Source:HGNC Symbol;Acc:11892]                                                 |
| ENSG00000206450 | HLA-B    | major histocompatibility complex, class I, B [Source:HGNC Symbol;Acc:4932]                           |
| ENSG00000206452 | HLA-C    | major histocompatibility complex, class I, C [Source:HGNC Symbol;Acc:4933]                           |



|                 |          |                                                                                                                 |
|-----------------|----------|-----------------------------------------------------------------------------------------------------------------|
| ENSG00000206503 | HLA-A    | major histocompatibility complex, class I, A [Source:HGNC Symbol;Acc:4931]                                      |
| ENSG00000206505 | HLA-A    | major histocompatibility complex, class I, A [Source:HGNC Symbol;Acc:4931]                                      |
| ENSG00000207778 | MIR122   | microRNA 122 [Source:HGNC Symbol;Acc:31501]                                                                     |
| ENSG00000207865 | MIR34A   | microRNA 34a [Source:HGNC Symbol;Acc:31635]                                                                     |
| ENSG00000213341 | CHUK     | conserved helix-loop-helix ubiquitous kinase [Source:HGNC Symbol;Acc:1974]                                      |
| ENSG00000213398 | LCAT     | lecithin-cholesterol acyltransferase [Source:HGNC Symbol;Acc:6522]                                              |
| ENSG00000213619 | NDUFS3   | NADH dehydrogenase (ubiquinone) Fe-S protein 3, 30kDa (NADH-coenzyme Q reductase) [Source:HGNC Symbol;Acc:7710] |
| ENSG00000213809 | KLRK1    | killer cell lectin-like receptor subfamily K, member 1 [Source:HGNC Symbol;Acc:18788]                           |
| ENSG00000213918 | DNASE1   | deoxyribonuclease I [Source:HGNC Symbol;Acc:2956]                                                               |
| ENSG00000218772 | FAM8A6P  | family with sequence similarity 8, member A6 pseudogene [Source:HGNC Symbol;Acc:16377]                          |
| ENSG00000223448 | LTB      | lymphotoxin beta (TNF superfamily, member 3) [Source:HGNC Symbol;Acc:6711]                                      |
| ENSG00000223481 | TAP2     | transporter 2, ATP-binding cassette, sub-family B (MDR/TAP) [Source:HGNC Symbol;Acc:44]                         |
| ENSG00000223496 | EXOSC6   | exosome component 6 [Source:HGNC Symbol;Acc:19055]                                                              |
| ENSG00000223532 | HLA-B    | major histocompatibility complex, class I, B [Source:HGNC Symbol;Acc:4932]                                      |
| ENSG00000223919 | LTA      | lymphotoxin alpha [Source:HGNC Symbol;Acc:6709]                                                                 |
| ENSG00000223952 | TNF      | tumor necrosis factor [Source:HGNC Symbol;Acc:11892]                                                            |
| ENSG00000223980 | HLA-A    | major histocompatibility complex, class I, A [Source:HGNC Symbol;Acc:4931]                                      |
| ENSG00000224290 | APOM     | apolipoprotein M [Source:HGNC Symbol;Acc:13916]                                                                 |
| ENSG00000224320 | HLA-A    | major histocompatibility complex, class I, A [Source:HGNC Symbol;Acc:4931]                                      |
| ENSG00000224586 | GPX5     | glutathione peroxidase 5 (epididymal androgen-related protein) [Source:HGNC Symbol;Acc:4557]                    |
| ENSG00000224608 | HLA-B    | major histocompatibility complex, class I, B [Source:HGNC Symbol;Acc:4932]                                      |
| ENSG00000225145 | HLA-S    | major histocompatibility complex, class I, S (pseudogene) [Source:HGNC Symbol;Acc:19395]                        |
| ENSG00000225691 | HLA-C    | major histocompatibility complex, class I, C [Source:HGNC Symbol;Acc:4933]                                      |
| ENSG00000225824 | HLA-DQB1 | major histocompatibility complex, class II, DQ beta 1 [Source:HGNC Symbol;Acc:4944]                             |
| ENSG00000225851 | HLA-S    | major histocompatibility complex, class I, S (pseudogene) [Source:HGNC Symbol;Acc:19395]                        |
| ENSG00000225890 | HLA-DQA1 | major histocompatibility complex, class II, DQ alpha 1 [Source:HGNC Symbol;Acc:4942]                            |
| ENSG00000225967 | TAP2     | transporter 2, ATP-binding cassette, sub-family B (MDR/TAP) [Source:HGNC Symbol;Acc:44]                         |
| ENSG00000226027 | HLA-S    | major histocompatibility complex, class I, S (pseudogene) [Source:HGNC Symbol;Acc:19395]                        |
| ENSG00000226215 | APOM     | apolipoprotein M [Source:HGNC Symbol;Acc:13916]                                                                 |
| ENSG00000226275 | LTA      | lymphotoxin alpha [Source:HGNC Symbol;Acc:6709]                                                                 |
| ENSG00000226979 | LTA      | lymphotoxin alpha [Source:HGNC Symbol;Acc:6709]                                                                 |
| ENSG00000227357 | HLA-DRB4 | major histocompatibility complex, class II, DR beta 4 [Source:HGNC Symbol;Acc:4952]                             |
| ENSG00000227507 | LTB      | lymphotoxin beta (TNF superfamily, member 3) [Source:HGNC Symbol;Acc:6711]                                      |
| ENSG00000227567 | APOM     | apolipoprotein M [Source:HGNC Symbol;Acc:13916]                                                                 |
| ENSG00000227715 | HLA-A    | major histocompatibility complex, class I, A [Source:HGNC Symbol;Acc:4931]                                      |
| ENSG00000227746 | C4A      | complement component 4A (Rodgers blood group) [Source:HGNC Symbol;Acc:1323]                                     |
| ENSG00000228080 | HLA-DRB1 | major histocompatibility complex, class II, DR beta 1 [Source:HGNC Symbol;Acc:4948]                             |
| ENSG00000228179 | HLA-S    | major histocompatibility complex, class I, S (pseudogene) [Source:HGNC Symbol;Acc:19395]                        |
| ENSG00000228284 | HLA-DQA1 | major histocompatibility complex, class II, DQ alpha 1 [Source:HGNC Symbol;Acc:4942]                            |
| ENSG00000228299 | HLA-C    | major histocompatibility complex, class I, C [Source:HGNC Symbol;Acc:4933]                                      |
| ENSG00000228321 | TNF      | tumor necrosis factor [Source:HGNC Symbol;Acc:11892]                                                            |
| ENSG00000228582 | TAP2     | transporter 2, ATP-binding cassette, sub-family B (MDR/TAP) [Source:HGNC Symbol;Acc:44]                         |
| ENSG00000228849 | TNF      | tumor necrosis factor [Source:HGNC Symbol;Acc:11892]                                                            |
| ENSG00000228964 | HLA-B    | major histocompatibility complex, class I, B [Source:HGNC Symbol;Acc:4932]                                      |
| ENSG00000228978 | TNF      | tumor necrosis factor [Source:HGNC Symbol;Acc:11892]                                                            |
| ENSG00000229058 | AGER     | advanced glycosylation end product-specific receptor [Source:HGNC Symbol;Acc:320]                               |
| ENSG00000229074 | HLA-DRB1 | major histocompatibility complex, class II, DR beta 1 [Source:HGNC Symbol;Acc:4948]                             |

|                 |          |                                                                                                               |
|-----------------|----------|---------------------------------------------------------------------------------------------------------------|
| ENSG00000229215 | HLA-A    | major histocompatibility complex, class I, A [Source:HGNC Symbol;Acc:4931]                                    |
| ENSG00000229690 | MTCO2P1  | MT-CO2 pseudogene 1 [Source:HGNC Symbol;Acc:16564]                                                            |
| ENSG00000230108 | TNF      | tumor necrosis factor [Source:HGNC Symbol;Acc:11892]                                                          |
| ENSG00000230279 | LTA      | lymphotoxin alpha [Source:HGNC Symbol;Acc:6709]                                                               |
| ENSG00000230514 | AGER     | advanced glycosylation end product-specific receptor [Source:HGNC Symbol;Acc:320]                             |
| ENSG00000231268 | AGER     | advanced glycosylation end product-specific receptor [Source:HGNC Symbol;Acc:320]                             |
| ENSG00000231286 | HLA-DQB1 | major histocompatibility complex, class II, DQ beta 1 [Source:HGNC Symbol;Acc:4944]                           |
| ENSG00000231314 | LTB      | lymphotoxin beta (TNF superfamily, member 3) [Source:HGNC Symbol;Acc:6711]                                    |
| ENSG00000231408 | LTA      | lymphotoxin alpha [Source:HGNC Symbol;Acc:6709]                                                               |
| ENSG00000231834 | HLA-A    | major histocompatibility complex, class I, A [Source:HGNC Symbol;Acc:4931]                                    |
| ENSG00000231939 | HLA-DQB1 | major histocompatibility complex, class II, DQ beta 1 [Source:HGNC Symbol;Acc:4944]                           |
| ENSG00000231974 | APOM     | apolipoprotein M [Source:HGNC Symbol;Acc:13916]                                                               |
| ENSG00000232062 | HLA-DQA1 | major histocompatibility complex, class II, DQ alpha 1 [Source:HGNC Symbol;Acc:4942]                          |
| ENSG00000232126 | HLA-B    | major histocompatibility complex, class I, B [Source:HGNC Symbol;Acc:4932]                                    |
| ENSG00000232326 | TAP2     | transporter 2, ATP-binding cassette, sub-family B (MDR/TAP) [Source:HGNC Symbol;Acc:44]                       |
| ENSG00000232810 | TNF      | tumor necrosis factor [Source:HGNC Symbol;Acc:11892]                                                          |
| ENSG00000233135 | RPS27P18 | ribosomal protein S27 pseudogene 18 [Source:HGNC Symbol;Acc:36296]                                            |
| ENSG00000233209 | HLA-DQB1 | major histocompatibility complex, class II, DQ beta 1 [Source:HGNC Symbol;Acc:4944]                           |
| ENSG00000233276 | GPX1     | glutathione peroxidase 1 [Source:HGNC Symbol;Acc:4553]                                                        |
| ENSG00000233841 | HLA-C    | major histocompatibility complex, class I, C [Source:HGNC Symbol;Acc:4933]                                    |
| ENSG00000234729 | AGER     | advanced glycosylation end product-specific receptor [Source:HGNC Symbol;Acc:320]                             |
| ENSG00000234745 | HLA-B    | major histocompatibility complex, class I, B [Source:HGNC Symbol;Acc:4932]                                    |
| ENSG00000235657 | HLA-A    | major histocompatibility complex, class I, A [Source:HGNC Symbol;Acc:4931]                                    |
| ENSG00000235754 | APOM     | apolipoprotein M [Source:HGNC Symbol;Acc:13916]                                                               |
| ENSG00000236237 | LTB      | lymphotoxin beta (TNF superfamily, member 3) [Source:HGNC Symbol;Acc:6711]                                    |
| ENSG00000236418 | HLA-DQA1 | major histocompatibility complex, class II, DQ alpha 1 [Source:HGNC Symbol;Acc:4942]                          |
| ENSG00000236884 | HLA-DRB1 | major histocompatibility complex, class II, DR beta 1 [Source:HGNC Symbol;Acc:4948]                           |
| ENSG00000236925 | LTB      | lymphotoxin beta (TNF superfamily, member 3) [Source:HGNC Symbol;Acc:6711]                                    |
| ENSG00000237022 | HLA-C    | major histocompatibility complex, class I, C [Source:HGNC Symbol;Acc:4933]                                    |
| ENSG00000237405 | AGER     | advanced glycosylation end product-specific receptor [Source:HGNC Symbol;Acc:320]                             |
| ENSG00000237559 | HLA-S    | major histocompatibility complex, class I, S (pseudogene) [Source:HGNC Symbol;Acc:19395]                      |
| ENSG00000237599 | TAP2     | transporter 2, ATP-binding cassette, sub-family B (MDR/TAP) [Source:HGNC Symbol;Acc:44]                       |
| ENSG00000238114 | LTB      | lymphotoxin beta (TNF superfamily, member 3) [Source:HGNC Symbol;Acc:6711]                                    |
| ENSG00000238130 | LTA      | lymphotoxin alpha [Source:HGNC Symbol;Acc:6709]                                                               |
| ENSG00000240583 | AQP1     | aquaporin 1 (Colton blood group) [Source:HGNC Symbol;Acc:633]                                                 |
| ENSG00000240972 | MIF      | macrophage migration inhibitory factor (glycosylation-inhibiting factor) [Source:HGNC Symbol;Acc:7097]        |
| ENSG00000241119 | UGT1A9   | UDP glucuronosyltransferase 1 family, polypeptide A9 [Source:HGNC Symbol;Acc:12541]                           |
| ENSG00000242110 | AMACR    | alpha-methylacyl-CoA racemase [Source:HGNC Symbol;Acc:451]                                                    |
| ENSG00000242252 | BGLAP    | bone gamma-carboxyglutamate (gla) protein [Source:HGNC Symbol;Acc:1043]                                       |
| ENSG00000242366 | UGT1A1   | UDP glucuronosyltransferase 1 family, polypeptide A1 [Source:HGNC Symbol;Acc:12530]                           |
| ENSG00000242515 | UGT1A10  | UDP glucuronosyltransferase 1 family, polypeptide A10 [Source:HGNC Symbol;Acc:12531]                          |
| ENSG00000243509 | TNFRSF6B | tumor necrosis factor receptor superfamily, member 6b, decoy [Source:HGNC Symbol;Acc:11921]                   |
| ENSG00000243772 | KIR2DL3  | killer cell immunoglobulin-like receptor, two domains, long cytoplasmic tail, 3 [Source:HGNC Symbol;Acc:6331] |
| ENSG00000243955 | GSTA1    | glutathione S-transferase alpha 1 [Source:HGNC Symbol;Acc:4626]                                               |
| ENSG00000244067 | GSTA2    | glutathione S-transferase alpha 2 [Source:HGNC Symbol;Acc:4627]                                               |
| ENSG00000244122 | UGT1A7   | UDP glucuronosyltransferase 1 family, polypeptide A7 [Source:HGNC Symbol;Acc:12539]                           |
| ENSG00000244207 | C4A      | complement component 4A (Rodgers blood group) [Source:HGNC Symbol;Acc:1323]                                   |

|                 |               |                                                                                                                                                          |
|-----------------|---------------|----------------------------------------------------------------------------------------------------------------------------------------------------------|
| ENSG00000244474 | UGT1A4        | UDP glucuronosyltransferase 1 family, polypeptide A4 [Source:HGNC Symbol;Acc:12536]                                                                      |
| ENSG00000244731 | C4A           | complement component 4A (Rodgers blood group) [Source:HGNC Symbol;Acc:1323]                                                                              |
| ENSG00000244734 | HBB           | hemoglobin, beta [Source:HGNC Symbol;Acc:4827]                                                                                                           |
| ENSG00000245848 | CEBPA         | CCAAT/enhancer binding protein (C/EBP), alpha [Source:HGNC Symbol;Acc:1833]                                                                              |
| ENSG00000248144 | ADH1C         | alcohol dehydrogenase 1C (class I), gamma polypeptide [Source:HGNC Symbol;Acc:251]                                                                       |
| ENSG00000250251 | PKD1P6        | polycystic kidney disease 1 (autosomal dominant) pseudogene 6 [Source:HGNC Symbol;Acc:30070]                                                             |
| ENSG00000253915 | MAPRE1P1      | MAPRE1 pseudogene 1 [Source:HGNC Symbol;Acc:29624]                                                                                                       |
| ENSG00000254345 | IGKV2D-23     | immunoglobulin kappa variable 2D-23 (pseudogene) [Source:HGNC Symbol;Acc:5796]                                                                           |
| ENSG00000254647 | INS           | insulin [Source:HGNC Symbol;Acc:6081]                                                                                                                    |
| ENSG00000255974 | CYP2A6        | cytochrome P450, family 2, subfamily A, polypeptide 6 [Source:HGNC Symbol;Acc:2610]                                                                      |
| ENSG00000256062 | ABO           | ABO blood group (transferase A, alpha 1-3-N-acetylgalactosaminyltransferase; transferase B, alpha 1-3-galactosyltransferase) [Source:HGNC Symbol;Acc:79] |
| ENSG00000257017 | HP            | haptoglobin [Source:HGNC Symbol;Acc:5141]                                                                                                                |
| ENSG00000259112 | NDUFC2-KCTD14 | NDUFC2-KCTD14 readthrough [Source:HGNC Symbol;Acc:42956]                                                                                                 |
| ENSG00000259207 | ITGB3         | integrin, beta 3 (platelet glycoprotein IIIa, antigen CD61) [Source:HGNC Symbol;Acc:6156]                                                                |
| ENSG00000259384 | GH1           | growth hormone 1 [Source:HGNC Symbol;Acc:4261]                                                                                                           |
| ENSG00000260099 | ADAMTS13      | ADAM metalloproteinase with thrombospondin type 1 motif, 13 [Source:HGNC Symbol;Acc:1366]                                                                |
| ENSG00000261698 | DGAT1         | diacylglycerol O-acyltransferase 1 [Source:HGNC Symbol;Acc:2843]                                                                                         |
| ENSG00000261701 | HPR           | haptoglobin-related protein [Source:HGNC Symbol;Acc:5156]                                                                                                |
| ENSG00000261912 | KIR2DL3       | killer cell immunoglobulin-like receptor, two domains, long cytoplasmic tail, 3 [Source:HGNC Symbol;Acc:6331]                                            |
| ENSG00000262062 | VTN           | vitronectin [Source:HGNC Symbol;Acc:12724]                                                                                                               |
| ENSG00000262077 | MLXIPL        | MLX interacting protein-like [Source:HGNC Symbol;Acc:12744]                                                                                              |
| ENSG00000262184 | ELN           | elastin [Source:HGNC Symbol;Acc:3327]                                                                                                                    |
| ENSG00000262279 | NCAM1         | neural cell adhesion molecule 1 [Source:HGNC Symbol;Acc:7656]                                                                                            |
| ENSG00000262418 | PTPRC         | protein tyrosine phosphatase, receptor type, C [Source:HGNC Symbol;Acc:9666]                                                                             |
| ENSG00000262552 | ALOX5         | arachidonate 5-lipoxygenase [Source:HGNC Symbol;Acc:435]                                                                                                 |
| ENSG00000262785 | PKLR          | pyruvate kinase, liver and RBC [Source:HGNC Symbol;Acc:9020]                                                                                             |
| ENSG00000262847 | MDH2          | malate dehydrogenase 2, NAD (mitochondrial) [Source:HGNC Symbol;Acc:6971]                                                                                |
| ENSG00000262933 | CALCA         | calcitonin-related polypeptide alpha [Source:HGNC Symbol;Acc:1437]                                                                                       |
| ENSG00000263005 | RASSF1        | Ras association (RalGDS/AF-6) domain family member 1 [Source:HGNC Symbol;Acc:9882]                                                                       |
| ENSG00000263027 | KIR2DL3       | killer cell immunoglobulin-like receptor, two domains, long cytoplasmic tail, 3 [Source:HGNC Symbol;Acc:6331]                                            |
| ENSG00000263032 | DLAT          | dihydrolipoamide S-acetyltransferase [Source:HGNC Symbol;Acc:2896]                                                                                       |
| ENSG00000263298 | ABCB11        | ATP-binding cassette, sub-family B (MDR/TAP), member 11 [Source:HGNC Symbol;Acc:42]                                                                      |
| ENSG00000263313 | MMP3          | matrix metalloproteinase 3 (stromelysin 1, progelatinase) [Source:HGNC Symbol;Acc:7173]                                                                  |
| ENSG00000263761 | GDF2          | growth differentiation factor 2 [Source:HGNC Symbol;Acc:4217]                                                                                            |
| ENSG00000264424 | MYH4          | myosin, heavy chain 4, skeletal muscle [Source:HGNC Symbol;Acc:7574]                                                                                     |
| ENSG00000265970 | HFE2          | hemochromatosis type 2 (juvenile) [Source:HGNC Symbol;Acc:4887]                                                                                          |
| ENSG00000266198 | PRKAB2        | protein kinase, AMP-activated, beta 2 non-catalytic subunit [Source:HGNC Symbol;Acc:9379]                                                                |
| ENSG00000266359 | AKR1C4        | aldo-keto reductase family 1, member C4 [Source:HGNC Symbol;Acc:387]                                                                                     |
| ENSG00000267195 | MIR212        | microRNA 212 [Source:HGNC Symbol;Acc:31589]                                                                                                              |
| ENSG00000267496 | FAM215A       | family with sequence similarity 215, member A (non-protein coding) [Source:HGNC Symbol;Acc:17505]                                                        |
| ENSG00000267855 | NDUFA7        | NADH dehydrogenase (ubiquinone) 1 alpha subcomplex, 7, 14.5kDa [Source:HGNC Symbol;Acc:7691]                                                             |
| ENSG00000268188 | HSD17B10      | hydroxysteroid (17-beta) dehydrogenase 10 [Source:HGNC Symbol;Acc:4800]                                                                                  |
| ENSG00000268765 | CYBB          | cytochrome b-245, beta polypeptide [Source:HGNC Symbol;Acc:2578]                                                                                         |
| ENSG00000268779 | CD4           | CD4 molecule [Source:HGNC Symbol;Acc:1678]                                                                                                               |
| ENSG00000269002 | FOXP3         | forkhead box P3 [Source:HGNC Symbol;Acc:6106]                                                                                                            |
| ENSG00000269083 | COX7B         | cytochrome c oxidase subunit VIIb [Source:HGNC Symbol;Acc:2291]                                                                                          |
| ENSG00000269087 | G6PD          | glucose-6-phosphate dehydrogenase [Source:HGNC Symbol;Acc:4057]                                                                                          |

|                 |              |                                                                                                                 |
|-----------------|--------------|-----------------------------------------------------------------------------------------------------------------|
| ENSG00000269261 | F8           | coagulation factor VIII, procoagulant component [Source:HGNC Symbol;Acc:3546]                                   |
| ENSG00000269512 | IL1RAPL2     | interleukin 1 receptor accessory protein-like 2 [Source:HGNC Symbol;Acc:5997]                                   |
| ENSG00000269528 | ENO2         | enolase 2 (gamma, neuronal) [Source:HGNC Symbol;Acc:3353]                                                       |
| ENSG00000269571 | RXRRA        | retinoid X receptor, alpha [Source:HGNC Symbol;Acc:10477]                                                       |
| ENSG00000270141 | TERC         | telomerase RNA component [Source:HGNC Symbol;Acc:11727]                                                         |
| ENSG00000270272 | NDUFB11      | NADH dehydrogenase (ubiquinone) 1 beta subcomplex, 11, 17.3kDa [Source:HGNC Symbol;Acc:20372]                   |
| ENSG00000270349 | RGN          | regucalcin [Source:HGNC Symbol;Acc:9989]                                                                        |
| ENSG00000270787 | KIR2DL3      | killer cell immunoglobulin-like receptor, two domains, long cytoplasmic tail, 3 [Source:HGNC Symbol;Acc:6331]   |
| ENSG00000271016 | NDUFA3       | NADH dehydrogenase (ubiquinone) 1 alpha subcomplex, 3, 9kDa [Source:HGNC Symbol;Acc:7686]                       |
| ENSG00000271092 | TMEM56-RWDD3 | TMEM56-RWDD3 readthrough [Source:HGNC Symbol;Acc:49388]                                                         |
| ENSG00000271503 | CCL5         | chemokine (C-C motif) ligand 5 [Source:HGNC Symbol;Acc:10632]                                                   |
| ENSG00000272000 | CYP2D6       | cytochrome P450, family 2, subfamily D, polypeptide 6 [Source:HGNC Symbol;Acc:2625]                             |
| ENSG00000272517 | TGFA         | transforming growth factor, alpha [Source:HGNC Symbol;Acc:11765]                                                |
| ENSG00000272553 | NDUFA3       | NADH dehydrogenase (ubiquinone) 1 alpha subcomplex, 3, 9kDa [Source:HGNC Symbol;Acc:7686]                       |
| ENSG00000272611 | CEACAM3      | carcinoembryonic antigen-related cell adhesion molecule 3 [Source:HGNC Symbol;Acc:1815]                         |
| ENSG00000272765 | NDUFA6       | NADH dehydrogenase (ubiquinone) 1 alpha subcomplex, 6, 14kDa [Source:HGNC Symbol;Acc:7690]                      |
| ENSG00000272985 | CD79A        | CD79a molecule, immunoglobulin-associated alpha [Source:HGNC Symbol;Acc:1698]                                   |
| ENSG00000273052 | NDUFA3       | NADH dehydrogenase (ubiquinone) 1 alpha subcomplex, 3, 9kDa [Source:HGNC Symbol;Acc:7686]                       |
| ENSG00000273095 | NDUFA3       | NADH dehydrogenase (ubiquinone) 1 alpha subcomplex, 3, 9kDa [Source:HGNC Symbol;Acc:7686]                       |
| ENSG00000273126 | NDUFA3       | NADH dehydrogenase (ubiquinone) 1 alpha subcomplex, 3, 9kDa [Source:HGNC Symbol;Acc:7686]                       |
| ENSG00000273178 | NDUFA3       | NADH dehydrogenase (ubiquinone) 1 alpha subcomplex, 3, 9kDa [Source:HGNC Symbol;Acc:7686]                       |
| ENSG00000273397 | NDUFA6       | NADH dehydrogenase (ubiquinone) 1 alpha subcomplex, 6, 14kDa [Source:HGNC Symbol;Acc:7690]                      |
| ENSG00000273426 | NDUFA3       | NADH dehydrogenase (ubiquinone) 1 alpha subcomplex, 3, 9kDa [Source:HGNC Symbol;Acc:7686]                       |
| ENSG00000273427 | NDUFA3       | NADH dehydrogenase (ubiquinone) 1 alpha subcomplex, 3, 9kDa [Source:HGNC Symbol;Acc:7686]                       |
| ENSG00000273453 | NDUFA3       | NADH dehydrogenase (ubiquinone) 1 alpha subcomplex, 3, 9kDa [Source:HGNC Symbol;Acc:7686]                       |
| LRG_11          | LRG_11       | cyclin-dependent kinase inhibitor 2A [Source:HGNC Symbol;Acc:1787]                                              |
| LRG_112         | LRG_112      | signal transducer and activator of transcription 3 (acute-phase response factor) [Source:HGNC Symbol;Acc:11364] |
| LRG_117         | LRG_117      | toll-like receptor 3 [Source:HGNC Symbol;Acc:11849]                                                             |
| LRG_13          | LRG_13       | calcitonin-related polypeptide alpha [Source:HGNC Symbol;Acc:1437]                                              |
| LRG_134         | LRG_134      | Fas cell surface death receptor [Source:HGNC Symbol;Acc:11920]                                                  |
| LRG_137         | LRG_137      | complement component 4A (Rodgers blood group) [Source:HGNC Symbol;Acc:1323]                                     |
| LRG_141         | LRG_141      | CD40 ligand [Source:HGNC Symbol;Acc:11935]                                                                      |
| LRG_142         | LRG_142      | CD81 molecule [Source:HGNC Symbol;Acc:1701]                                                                     |
| LRG_145         | LRG_145      | coagulation factor XII (Hageman factor) [Source:HGNC Symbol;Acc:3530]                                           |
| LRG_148         | LRG_148      | glucose-6-phosphate dehydrogenase [Source:HGNC Symbol;Acc:4057]                                                 |
| LRG_154         | LRG_154      | mannose-binding lectin (protein C) 2, soluble [Source:HGNC Symbol;Acc:6922]                                     |
| LRG_155         | LRG_155      | CD46 molecule, complement regulatory protein [Source:HGNC Symbol;Acc:6953]                                      |
| LRG_156         | LRG_156      | mevalonate kinase [Source:HGNC Symbol;Acc:7530]                                                                 |
| LRG_16          | LRG_16       | adenosine deaminase [Source:HGNC Symbol;Acc:186]                                                                |
| LRG_168         | LRG_168      | thrombomodulin [Source:HGNC Symbol;Acc:11784]                                                                   |
| LRG_17          | LRG_17       | activation-induced cytidine deaminase [Source:HGNC Symbol;Acc:13203]                                            |
| LRG_18          | LRG_18       | autoimmune regulator [Source:HGNC Symbol;Acc:360]                                                               |
| LRG_188         | LRG_188      | interleukin 1 receptor antagonist [Source:HGNC Symbol;Acc:6000]                                                 |
| LRG_191         | LRG_191      | phosphatidylinositol-4,5-bisphosphate 3-kinase, catalytic subunit delta [Source:HGNC Symbol;Acc:8977]           |
| LRG_193         | LRG_193      | tumor necrosis factor receptor superfamily, member 1A [Source:HGNC Symbol;Acc:11916]                            |
| LRG_204         | LRG_204      | sarcoglycan, beta (43kDa dystrophin-associated glycoprotein) [Source:HGNC Symbol;Acc:10806]                     |
| LRG_215         | LRG_215      | epithelial cell adhesion molecule [Source:HGNC Symbol;Acc:11529]                                                |

|         |         |                                                                                                                                         |
|---------|---------|-----------------------------------------------------------------------------------------------------------------------------------------|
| LRG_248 | LRG_248 | heat shock 27kDa protein 1 [Source:HGNC Symbol;Acc:5246]                                                                                |
| LRG_260 | LRG_260 | nerve growth factor (beta polypeptide) [Source:HGNC Symbol;Acc:7808]                                                                    |
| LRG_274 | LRG_274 | low density lipoprotein receptor [Source:HGNC Symbol;Acc:6547]                                                                          |
| LRG_275 | LRG_275 | proprotein convertase subtilisin/kexin type 9 [Source:HGNC Symbol;Acc:20001]                                                            |
| LRG_283 | LRG_283 | leptin receptor [Source:HGNC Symbol;Acc:6554]                                                                                           |
| LRG_298 | LRG_298 | bone morphogenetic protein receptor, type IA [Source:HGNC Symbol;Acc:1076]                                                              |
| LRG_301 | LRG_301 | cadherin 1, type 1, E-cadherin (epithelial) [Source:HGNC Symbol;Acc:1748]                                                               |
| LRG_311 | LRG_311 | phosphatase and tensin homolog [Source:HGNC Symbol;Acc:9588]                                                                            |
| LRG_316 | LRG_316 | succinate dehydrogenase complex, subunit B, iron sulfur (lp) [Source:HGNC Symbol;Acc:10681]                                             |
| LRG_317 | LRG_317 | succinate dehydrogenase complex, subunit C, integral membrane protein, 15kDa [Source:HGNC Symbol;Acc:10682]                             |
| LRG_318 | LRG_318 | SMAD family member 4 [Source:HGNC Symbol;Acc:6770]                                                                                      |
| LRG_321 | LRG_321 | tumor protein p53 [Source:HGNC Symbol;Acc:11998]                                                                                        |
| LRG_329 | LRG_329 | caveolin 3 [Source:HGNC Symbol;Acc:1529]                                                                                                |
| LRG_34  | LRG_34  | caspace 8, apoptosis-related cysteine peptidase [Source:HGNC Symbol;Acc:1509]                                                           |
| LRG_343 | LRG_343 | telomerase reverse transcriptase [Source:HGNC Symbol;Acc:11730]                                                                         |
| LRG_347 | LRG_347 | telomerase RNA component [Source:HGNC Symbol;Acc:11727]                                                                                 |
| LRG_354 | LRG_354 | itchy E3 ubiquitin protein ligase [Source:HGNC Symbol;Acc:13890]                                                                        |
| LRG_355 | LRG_355 | interleukin 17 receptor A [Source:HGNC Symbol;Acc:5985]                                                                                 |
| LRG_388 | LRG_388 | actin, alpha, cardiac muscle 1 [Source:HGNC Symbol;Acc:143]                                                                             |
| LRG_40  | LRG_40  | CD40 molecule, TNF receptor superfamily member 5 [Source:HGNC Symbol;Acc:11919]                                                         |
| LRG_415 | LRG_415 | synemin, intermediate filament protein [Source:HGNC Symbol;Acc:24466]                                                                   |
| LRG_42  | LRG_42  | CD79a molecule, immunoglobulin-associated alpha [Source:HGNC Symbol;Acc:1698]                                                           |
| LRG_437 | LRG_437 | calcium channel, voltage-dependent, alpha 2/delta subunit 1 [Source:HGNC Symbol;Acc:1399]                                               |
| LRG_450 | LRG_450 | hydroxysteroid (17-beta) dehydrogenase 10 [Source:HGNC Symbol;Acc:4800]                                                                 |
| LRG_456 | LRG_456 | CCAAT/enhancer binding protein (C/EBP), alpha [Source:HGNC Symbol;Acc:1833]                                                             |
| LRG_482 | LRG_482 | runt-related transcription factor 1 [Source:HGNC Symbol;Acc:10471]                                                                      |
| LRG_488 | LRG_488 | anaplastic lymphoma receptor tyrosine kinase [Source:HGNC Symbol;Acc:427]                                                               |
| LRG_505 | LRG_505 | glypican 3 [Source:HGNC Symbol;Acc:4451]                                                                                                |
| LRG_510 | LRG_510 | myeloproliferative leukemia virus oncogene [Source:HGNC Symbol;Acc:7217]                                                                |
| LRG_522 | LRG_522 | HNF1 homeobox A [Source:HGNC Symbol;Acc:11621]                                                                                          |
| LRG_53  | LRG_53  | cytochrome b-245, beta polypeptide [Source:HGNC Symbol;Acc:2578]                                                                        |
| LRG_57  | LRG_57  | elastase, neutrophil expressed [Source:HGNC Symbol;Acc:3309]                                                                            |
| LRG_58  | LRG_58  | Fas ligand (TNF superfamily, member 6) [Source:HGNC Symbol;Acc:11936]                                                                   |
| LRG_62  | LRG_62  | forkhead box P3 [Source:HGNC Symbol;Acc:6106]                                                                                           |
| LRG_66  | LRG_66  | interferon gamma receptor 1 [Source:HGNC Symbol;Acc:5439]                                                                               |
| LRG_71  | LRG_71  | interleukin 12B (natural killer cell stimulatory factor 2, cytotoxic lymphocyte maturation factor 2, p40) [Source:HGNC Symbol;Acc:5970] |
| LRG_717 | LRG_717 | aquaporin 2 (collecting duct) [Source:HGNC Symbol;Acc:634]                                                                              |
| LRG_73  | LRG_73  | interleukin 2 receptor, alpha [Source:HGNC Symbol;Acc:6008]                                                                             |
| LRG_84  | LRG_84  | myeloperoxidase [Source:HGNC Symbol;Acc:7218]                                                                                           |
